# Supplementary material for: Learning heritable multimodal brain representation via contrastive learning
Source: Research Square preprint supplement (doi:10.21203/rs.3.rs-8866615/v1), 2026-04-24
Supplement: Supplementary file 1 [file 8d83aa1a32b1fa6c41f2ac89.xlsx]

## Sheet: Table1-Overlap of MM-UDIP loci 
GenomicLocus	uniqID	rsID	chr	pos	p	start	end	nSNPs	nGWASSNPs	nIndSigSNPs	IndSigSNPs	nLeadSNPs	LeadSNPs	SOURCE	LeadSNP	symbol	ensg	entrezID	HUGO	pLI	ncRVIS	posMapSNPs	posMapMaxCADD	minGwasP	GWAS_Trait	GWAS_Study	GWAS_PMID	GWAS_P_min	GWAS_OrBeta_top	nearestGene	dist	func	CADD	RDB	posMapFilt	eqtlMapFilt	ciMapFilt
2; 1	1:47974123:C:T; 1:47980916:G:T	rs61784835; rs6658111	1	47974123; 47980916	1.10482e-16; 1.2486e-18	47974123	47980916	4; 14	3; 13	2; 3	rs61784835;rs12143164; rs6658111;rs72688340;rs12118339	1; 1	rs61784835; rs6658111	mocov2_T2; mocov2_T1	rs61784835; rs6658111										Vertex-wise sulcal depth; Whole brain restricted directional diffusion (multivariate analysis); Whole brain restricted isotropic diffusion (multivariate analysis); Vertex-wise cortical thickness; Whole brain free water diffusion (multivariate analysis); Vertex-wise sulcal depth; Whole brain restricted directional diffusion (multivariate analysis); Whole brain restricted isotropic diffusion (multi…	The genetic architecture of human cortical folding.; Multivariate genome-wide association study on tissue-sensitive diffusion metrics highlights pathways that shape the human brain.; The genetic architecture of human cortical folding.; Multivariate genome-wide association study on tissue-sensitive diffusion metrics highlights pathways that shape the human brain.	34910505; 35505052; 34910505; 35505052	5e-324; 5e-324		AL356458.1; AL356458.1	5811; 12604	intergenic; intergenic	15.12; 11.75	4.0; 5.0	0.0; 0.0	0.0; 0.0	0.0; 0.0
2; 3	1:215137222:A:C; 1:215139887:A:T	rs6540873; rs1452628	1	215137222; 215139887	1.78949e-13; 2.83802e-12	215135413	215153067	20; 21	19; 20	1; 1	rs6540873; rs1452628	1; 1	rs6540873; rs1452628	mocov2_T1; mocov2_T2	rs6540873; rs1452628										Vertex-wise cortical thickness; Whole brain free water diffusion (multivariate analysis); Whole brain restricted directional diffusion (multivariate analysis); Whole brain restricted isotropic diffusion (multivariate analysis); Vertex-wise sulcal depth; Vertex-wise cortical thickness; Whole brain free water diffusion (multivariate analysis); Whole brain restricted directional diffusion (multivari…	The genetic architecture of human cortical folding.; Multivariate genome-wide association study on tissue-sensitive diffusion metrics highlights pathways that shape the human brain.; The genetic architecture of human cortical folding.; Multivariate genome-wide association study on tissue-sensitive diffusion metrics highlights pathways that shape the human brain.	34910505; 35505052; 34910505; 35505052	6e-142; 6e-142	25.37; 25.37	RP11-323K10.1; RP11-323K10.1	20338; 23003	intergenic; intergenic	6.348; 8.027	6.0	0.0; 0.0	0.0; 0.0	0.0; 0.0
5; 4	2:65977031:C:G; 2:65977031:C:G	rs6546176; rs6546176	2	65977031; 65977031	8.35324e-18; 5.07143e-15	65943823	65999623	69; 68	61; 60	2; 2	rs6546176;rs6709906; rs6546176;rs12989218	1; 1	rs6546176; rs6546176	mocov2_T1; mocov2_T2	rs6546176; rs6546176										Vertex-wise sulcal depth; Whole brain restricted directional diffusion (multivariate analysis); Vertex-wise cortical surface area; Brain shape (segment 22); Vertex-wise cortical thickness; Vertex-wise sulcal depth; Whole brain restricted directional diffusion (multivariate analysis); Vertex-wise cortical surface area; Brain shape (segment 22); Vertex-wise cortical thickness	The genetic architecture of human cortical folding.; Multivariate genome-wide association study on tissue-sensitive diffusion metrics highlights pathways that shape the human brain.; Shared heritability of human face and brain shape.; The genetic architecture of human cortical folding.; Multivariate genome-wide association study on tissue-sensitive diffusion metrics highlights pathways that shape…	34910505; 35505052; 33821002; 34910505; 35505052; 33821002	1e-240; 1e-240	33.13; 18.79; 33.13; 18.79	AC074391.1; AC074391.1	0; 0	ncRNA_intronic; ncRNA_intronic	0.909; 0.909	5.0; 5.0	0.0; 0.0	0.0; 0.0	0.0; 0.0
6; 5	2:71961307:C:T; 2:71961307:C:T	rs12466122; rs12466122	2	71961307; 71961307	1.78038e-13; 1.43902e-12	71951050	72009917	66; 66	59; 59	2; 2	rs12466122;rs13033431; rs12466122;rs13033431	1; 1	rs12466122; rs12466122	mocov2_T1; mocov2_T2	rs12466122; rs12466122										Whole brain restricted isotropic diffusion (multivariate analysis); Vertex-wise sulcal depth; Height; Whole brain restricted directional diffusion (multivariate analysis); Appendicular lean mass; Whole brain restricted isotropic diffusion (multivariate analysis); Vertex-wise sulcal depth; Height; Whole brain restricted directional diffusion (multivariate analysis); Appendicular lean mass	Multivariate genome-wide association study on tissue-sensitive diffusion metrics highlights pathways that shape the human brain.; The genetic architecture of human cortical folding.; Leveraging Polygenic Functional Enrichment to Improve GWAS Power.; The genetic architecture of appendicular lean mass characterized by association analysis in the UK Biobank study.; Multivariate genome-wide associati…	35505052; 34910505; 30595370; 33097823; 35505052; 34910505; 30595370; 33097823	6e-26; 6e-26	10.53; 10.53	DYSF; DYSF	47408; 47408	intergenic; intergenic	0.134; 0.134	7.0; 7.0	0.0; 0.0	0.0; 0.0	0.0; 0.0
9; 9	3:190640134:A:T; 3:190641068:G:T	rs4308324; rs58531798	3	190640134; 190641068	4.02188e-13; 4.72269e-14	190592836	190678743	169; 183	120; 131	1; 1	rs4308324; rs58531798	1; 1	rs4308324; rs58531798	mocov2_T1; mocov2_T2	rs4308324; rs58531798	GMNC; GMNC	ENSG00000205835; ENSG00000205835	647309; 647309.0	GMNC; GMNC		1.10405959; 1.10405959	19.0; 28.0	12.4; 12.4	9.05408e-09; 6.57697e-09	Vertex-wise sulcal depth; Brain morphology (MOSTest); Vertex-wise cortical thickness; Vertex-wise cortical surface area; Vertex-wise sulcal depth; Brain morphology (MOSTest); Vertex-wise cortical thickness; Vertex-wise cortical surface area	The genetic architecture of human cortical folding.; Boosting Schizophrenia Genetics by Utilizing Genetic Overlap With Brain Morphology.; Understanding the genetic determinants of the brain with MOSTest.; The genetic architecture of human cortical folding.; Boosting Schizophrenia Genetics by Utilizing Genetic Overlap With Brain Morphology.; Understanding the genetic determinants of the brain with…	34910505; 35164939; 32665545; 34910505; 35164939; 32665545	9.999999999999999e-129; 9.999999999999999e-129	24.13; 18.66; 24.13; 18.66	GMNC; GMNC	29915; 30849	intergenic; intergenic	3.265; 2.779	7.0; 7.0	0.0; 0.0	0.0; 0.0	0.0; 0.0
10; 10	4:103188709:C:T; 4:103198082:A:G	rs13107325; rs13135092	4	103188709; 103198082	8.82769e-17; 1.30637e-14	103001649	103387161	30; 25	30; 25	4; 2	rs13107325;rs34333163;rs34592089;rs6855246; rs13135092;rs34333163	1; 1	rs13107325; rs13135092	mocov2_T1; mocov2_T2	rs13107325; rs13135092	BANK1; SLC39A8; BANK1; SLC39A8	ENSG00000153064; ENSG00000138821; ENSG00000153064; ENSG00000138821	55024; 64116; 55024.0; 64116.0	BANK1; SLC39A8; BANK1; SLC39A8	0.4457837395106335; 0.4457837395106335	-0.254000016; -0.254000016	16.0; 11.0	23.1; 23.1	8.82769e-17; 1.30637e-14	High density lipoprotein cholesterol levels; Vertex-wise cortical thickness; Brain morphology (MOSTest); Liver fibrosis and steatohepatitis severity (MRI cT1 measure); Whole brain restricted isotropic diffusion (multivariate analysis); High density lipoprotein cholesterol levels; Vertex-wise cortical thickness; Brain morphology (MOSTest); Liver fibrosis and steatohepatitis severity (MRI cT1 measu…	The power of genetic diversity in genome-wide association studies of lipids.; The genetic architecture of human cortical folding.; Boosting Schizophrenia Genetics by Utilizing Genetic Overlap With Brain Morphology.; Genome-wide and Mendelian randomisation studies of liver MRI yield insights into the pathogenesis of steatohepatitis.; Multivariate genome-wide association study on tissue-sensitive d…	34887591; 34910505; 35164939; 32247823; 35505052; 34887591; 34910505; 35164939; 32247823; 35505052	1e-185; 1e-185	28.2; 28.2	SLC39A8; SLC39A8	0; 0	exonic; intronic	23.1; 10.31	5.0; 6.0	1.0; 1.0	0.0; 0.0	0.0; 0.0
12; 13	6:126751921:C:T; 6:126851160:C:T	rs9401881; rs1490384	6	126751921; 126851160	5.05279e-11; 5.03317e-14	126659043	127080700	252; 255	205; 208	1; 2	rs9401881; rs1490384;rs58321169	1; 1	rs9401881; rs1490384	mocov2_T1; mocov2_T2	rs9401881; rs1490384	CENPW; CENPW	ENSG00000203760; ENSG00000203760	387103; 387103.0	CENPW; CENPW	0.50013630684411; 0.50013630684411	-0.442381075; -0.442381075	17.0; 15.0	10.05; 10.05	9.57936e-11; 1.5799e-11	Height; Vertex-wise sulcal depth; Appendicular lean mass; Vertex-wise cortical thickness; Height; Vertex-wise sulcal depth; Appendicular lean mass; Vertex-wise cortical surface area	Leveraging Polygenic Functional Enrichment to Improve GWAS Power.; The genetic architecture of human cortical folding.; The genetic architecture of appendicular lean mass characterized by association analysis in the UK Biobank study.; A cross-population atlas of genetic associations for 220 human phenotypes.; Leveraging Polygenic Functional Enrichment to Improve GWAS Power.; The genetic architect…	30595370; 34910505; 33097823; 34594039; 30595370; 34910505; 33097823; 34594039	3e-166; 3e-166	27.02; 0.0462; 27.02; 0.0462	MIR588; MIR588	53855; 45300	intergenic; intergenic	13.44; 18.6	7.0; 7.0	0.0; 0.0	0.0; 0.0	0.0; 0.0
13; 14	6:151021722:A:G; 6:151021722:A:G	rs12206172; rs12206172	6	151021722; 151021722	3.20153e-12; 2.28546e-11	151015996	151026312	44; 26	39; 22	2; 1	rs12206172;rs2279629; rs12206172	1; 1	rs12206172; rs12206172	mocov2_T1; mocov2_T2	rs12206172; rs12206172	PLEKHG1; PLEKHG1	ENSG00000120278; ENSG00000120278	57480; 57480.0	PLEKHG1; PLEKHG1	0.0001786774083035; 0.0001786774083035	1.445662511; 1.445662511	44.0; 26.0	17.23; 17.23	3.20153e-12; 2.28546e-11	Whole brain restricted isotropic diffusion (multivariate analysis); Whole brain free water diffusion (multivariate analysis); White matter hyperintensities; Vertex-wise cortical thickness; White matter hyperintensity volume; Whole brain restricted isotropic diffusion (multivariate analysis); Whole brain free water diffusion (multivariate analysis); White matter hyperintensities; Vertex-wise corti…	Multivariate genome-wide association study on tissue-sensitive diffusion metrics highlights pathways that shape the human brain.; Genome-wide association study of MRI markers of cerebral small vessel disease in 42,310 participants.; The genetic architecture of human cortical folding.; Cerebral small vessel disease genomics and its implications across the lifespan.; Multivariate genome-wide associ…	35505052; 32358547; 34910505; 33293549; 35505052; 32358547; 34910505; 33293549	1.0000000000000001e-23; 1.0000000000000001e-23	7.807; 7.807	PLEKHG1; PLEKHG1	0; 0	intronic; intronic	4.875; 4.875	7.0; 7.0	1.0; 1.0	0.0; 0.0	0.0; 0.0
14; 15	6:151857594:A:G; 6:151872448:G:T	rs6931664; rs9479068	6	151857594; 151872448	6.17876e-13; 6.3873e-12	151847381	151912703	98; 98	87; 87	3; 3	rs6931664;rs66775662;rs4870045; rs9479068;rs66775662;rs4870045	1; 1	rs6931664; rs9479068	mocov2_T1; mocov2_T2	rs6931664; rs9479068	CCDC170; CCDC170	ENSG00000120262; ENSG00000120262	80129; 80129.0	CCDC170; CCDC170	1.02112361613873e-19; 1.02112361613873e-19	1.380677467; 1.380677467	98.0; 98.0	16.75; 16.75	6.17876e-13; 6.3873e-12	Heel bone mineral density; Heel bone mineral density	Identification of 613 new loci associated with heel bone mineral density and a polygenic risk score for bone mineral density, osteoporosis and fracture.; Leveraging Polygenic Functional Enrichment to Improve GWAS Power.; Identification of 613 new loci associated with heel bone mineral density and a polygenic risk score for bone mineral density, osteoporosis and fracture.; Leveraging Polygenic Fun…	30048462; 30595370; 30048462; 30595370	0.0; 0.0	0.0883992; 0.0883992	CCDC170; CCDC170	0; 0	intronic; intronic	3.742; 6.997	5.0	1.0; 1.0	0.0; 0.0	0.0; 0.0
15; 16	7:2863574:A:G; 7:2863574:A:G	rs2107964; rs2107964	7	2863574; 2863574	3.0693e-18; 3.53786e-21	2752152	2912928	222; 230	180; 186	3; 5	rs2107964;rs1713913;rs798512; rs2107964;rs1713913;rs1183079;rs798512;rs7790322	1; 1	rs2107964; rs2107964	mocov2_T1; mocov2_T2	rs2107964; rs2107964	AMZ1; GNA12; AMZ1; GNA12	ENSG00000174945; ENSG00000146535; ENSG00000174945; ENSG00000146535	155185; 2768; 155185.0; 2768.0	AMZ1; GNA12; AMZ1; GNA12	0.4541349910779825; 0.4541349910779825	2.216605784; 2.216605784	284.0; 291.0	13.96; 13.96	3.0693e-18; 3.53786e-21	Height; Appendicular lean mass; Height; Appendicular lean mass	Leveraging Polygenic Functional Enrichment to Improve GWAS Power.; A cross-population atlas of genetic associations for 220 human phenotypes.; Defining the role of common variation in the genomic and biological architecture of adult human height.; The genetic architecture of appendicular lean mass characterized by association analysis in the UK Biobank study.; Characterizing rare and low-frequenc…	30595370; 34594039; 25282103; 33097823; 31562340; 30595370; 34594039; 25282103; 33097823; 31562340	2e-241; 2e-241	0.0391; 0.057; 0.0391; 0.057	GNA12; GNA12	0; 0	intronic; intronic	0.846; 0.846	6.0; 6.0	1.0; 1.0	0.0; 0.0	0.0; 0.0
16; 17	7:19611753:C:T; 7:19611753:C:T	rs10807794; rs10807794	7	19611753; 19611753	1.27035e-15; 1.17071e-17	19548842	19654201	307; 280	265; 246	4; 2	rs10807794;rs6461447;rs12668640;rs4719563; rs10807794;rs6461447	1; 1	rs10807794; rs10807794	mocov2_T1; mocov2_T2	rs10807794; rs10807794										Vertex-wise sulcal depth; Whole brain restricted directional diffusion (multivariate analysis); Whole brain restricted isotropic diffusion (multivariate analysis); Vertex-wise cortical thickness; Whole brain free water diffusion (multivariate analysis); Vertex-wise sulcal depth; Whole brain restricted directional diffusion (multivariate analysis); Whole brain restricted isotropic diffusion (multi…	The genetic architecture of human cortical folding.; Multivariate genome-wide association study on tissue-sensitive diffusion metrics highlights pathways that shape the human brain.; The genetic architecture of human cortical folding.; Multivariate genome-wide association study on tissue-sensitive diffusion metrics highlights pathways that shape the human brain.	34910505; 35505052; 34910505; 35505052	3e-267; 3e-267	34.93; 34.93	AC007091.1; AC007091.1	0; 0	ncRNA_intronic; ncRNA_intronic	0.154; 0.154	5.0; 5.0	0.0; 0.0	0.0; 0.0	0.0; 0.0
19; 18	7:120974765:A:G; 7:120974765:A:G	rs3801387; rs3801387	7	120974765; 120974765	1.12328e-46; 1.53088e-60	120748257	121040782	205; 250	176; 213	15; 18	rs79162867;rs76042375;rs2140648;rs798906;rs10233441;rs17509082;rs2707520;rs2707518;rs12668590;rs17284876;rs13247600;rs12706326;rs9769381;rs3801387;rs2908004; rs4731007;rs798906;rs10233441;rs17509082;rs2707520;rs2707518;rs17356657;rs17284876;rs798908;rs76042375;rs2110279;rs79162867;rs13247600;rs9769381;rs3801387;rs1541509;rs2536189;rs2952565	5; 6	rs79162867;rs2140648;rs13247600;rs9769381;rs3801387; rs4731007;rs798908;rs13247600;rs9769381;rs3801387;rs2952565	mocov2_T1; mocov2_T2	rs79162867; rs4731007	CPED1; WNT16; FAM3C; CPED1; WNT16; FAM3C	ENSG00000106034; ENSG00000002745; ENSG00000196937; ENSG00000106034; ENSG00000002745; ENSG00000196937	79974; 51384; 10447; 79974.0; 51384.0; 10447.0	CPED1; WNT16; FAM3C; CPED1; WNT16; FAM3C	0.0004220777688709; 0.0004220777688709	-0.7898043156666666; -0.7898043156666666	201.0; 246.0	21.0; 23.4	1.12328e-46; 1.53088e-60	Heel bone mineral density; Heel bone mineral density	Identification of 613 new loci associated with heel bone mineral density and a polygenic risk score for bone mineral density, osteoporosis and fracture.; Identification of 153 new loci associated with heel bone mineral density and functional involvement of GPC6 in osteoporosis.; Leveraging Polygenic Functional Enrichment to Improve GWAS Power.; Genotype-by-environment interactions inferred from g…	30048462; 28869591; 30595370; 31453325; 30048462; 28869591; 30595370; 31453325	0.0; 0.0	0.17; 0.179756; 0.17; 0.179756	CPED1; CPED1	0; 0	intronic; intronic	5.961; 0.187	4.0; 6.0	1.0; 1.0	0.0; 0.0	0.0; 0.0
20; 19	7:151498679:C:T; 7:151498679:C:T	rs4128399; rs4128399	7	151498679; 151498679	4.84702e-12; 2.69633e-13	151492906	151504459	8; 8	7; 7	2; 2	rs4128399;rs13224758; rs4128399;rs12703159	1; 1	rs4128399; rs4128399	mocov2_T1; mocov2_T2	rs4128399; rs4128399	PRKAG2; PRKAG2	ENSG00000106617; ENSG00000106617	51422; 51422.0	PRKAG2; PRKAG2	0.977557428638321; 0.977557428638321	1.331830924; 1.331830924	8.0; 8.0	8.138; 8.138	4.84702e-12; 2.69633e-13	Whole brain restricted isotropic diffusion (multivariate analysis); Whole brain free water diffusion (multivariate analysis); Whole brain restricted directional diffusion (multivariate analysis); Vertex-wise sulcal depth; Vertex-wise cortical thickness; Whole brain restricted isotropic diffusion (multivariate analysis); Whole brain free water diffusion (multivariate analysis); Whole brain restric…	Multivariate genome-wide association study on tissue-sensitive diffusion metrics highlights pathways that shape the human brain.; The genetic architecture of human cortical folding.; Multivariate genome-wide association study on tissue-sensitive diffusion metrics highlights pathways that shape the human brain.; The genetic architecture of human cortical folding.	35505052; 34910505; 35505052; 34910505	2e-69; 2e-69		PRKAG2; PRKAG2	0; 0	intronic; intronic	0.584; 0.584	7.0; 7.0	1.0; 1.0	0.0; 0.0	0.0; 0.0
22; 21	8:119952750:A:C; 8:119952750:A:C	rs6469788; rs6469788	8	119952750; 119952750	2.91261e-13; 2.30804e-14	119886923	120063542	154; 158	128; 132	2; 3	rs6469788;rs1485302; rs6469788;rs1385499;rs1485302	1; 1	rs6469788; rs6469788	mocov2_T1; mocov2_T2	rs6469788; rs6469788	TNFRSF11B; COLEC10; TNFRSF11B; COLEC10	ENSG00000164761; ENSG00000184374; ENSG00000164761; ENSG00000184374	4982; 10584; 4982.0; 10584.0	TNFRSF11B; COLEC10; TNFRSF11B; COLEC10	0.185383087500096; 0.185383087500096	-0.044626199; -0.044626199	137.0; 137.0	20.6; 20.6	2.91261e-13; 2.30804e-14	Liver enzyme levels (alkaline phosphatase); Serum alkaline phosphatase levels; Lumbar spine bone mineral density; Total body bone mineral density; Liver enzyme levels (alkaline phosphatase); Serum alkaline phosphatase levels; Lumbar spine bone mineral density; Total body bone mineral density	Genetic analysis in European ancestry individuals identifies 517 loci associated with liver enzymes.; A cross-population atlas of genetic associations for 220 human phenotypes.; Genome-wide association study of serum liver enzymes implicates diverse metabolic and liver pathology.; Genome-wide meta-analysis identifies 56 bone mineral density loci and reveals 14 loci associated with risk of fractur…	33972514; 34594039; 33547301; 22504420; 29304378; 33972514; 34594039; 33547301; 22504420; 29304378	3.9999999999999997e-128; 3.9999999999999997e-128	0.00543394; 0.0463; 19.5; 0.00543394; 0.0463; 19.5	TNFRSF11B; TNFRSF11B	0; 0	intronic; intronic	2.068; 2.068	7.0; 7.0	1.0; 1.0	0.0; 0.0	0.0; 0.0
23; 22	9:113665419:A:G; 9:113665419:A:G	rs1409682; rs1409682	9	113665419; 113665419	7.15575e-13; 1.06096e-11	113648136	113776692	101; 105	84; 88	3; 3	rs1409682;rs10817124;rs10817103; rs1409682;rs10817124;rs10980625	1; 1	rs1409682; rs1409682	mocov2_T1; mocov2_T2	rs1409682; rs1409682	LPAR1; LPAR1	ENSG00000198121; ENSG00000198121	1902; 1902.0	LPAR1; LPAR1	0.0014189810556421; 0.0014189810556421	0.680565103; 0.680565103	101.0; 105.0	16.43; 16.43	7.15575e-13; 1.06096e-11	Whole brain free water diffusion (multivariate analysis); Vertex-wise cortical thickness; Vertex-wise sulcal depth; Whole brain restricted isotropic diffusion (multivariate analysis); Central corneal thickness; Whole brain free water diffusion (multivariate analysis); Vertex-wise cortical thickness; Vertex-wise sulcal depth; Whole brain restricted isotropic diffusion (multivariate analysis); Cent…	Multivariate genome-wide association study on tissue-sensitive diffusion metrics highlights pathways that shape the human brain.; The genetic architecture of human cortical folding.; A multiethnic genome-wide analysis of 44,039 individuals identifies 41 new loci associated with central corneal thickness.; Multivariate genome-wide association study on tissue-sensitive diffusion metrics highlights …	35505052; 34910505; 32528159; 35505052; 34910505; 32528159	9e-47; 9e-47	11.82; 10.04; 11.82; 10.04	LPAR1; LPAR1	0; 0	intronic; intronic	3.386; 3.386		1.0; 1.0	0.0; 0.0	0.0; 0.0
26; 24	11:27301437:A:G; 11:27301437:A:G	rs7115024; rs7115024	11	27301437; 27301437	1.42081e-10; 6.57185e-11	27265644	27338712	127; 127	109; 109	1; 1	rs7115024; rs7115024	1; 1	rs7115024; rs7115024	mocov2_T1; mocov2_T2	rs7115024; rs7115024										Heel bone mineral density; Heel bone mineral density	Leveraging Polygenic Functional Enrichment to Improve GWAS Power.; Identification of 613 new loci associated with heel bone mineral density and a polygenic risk score for bone mineral density, osteoporosis and fracture.; An atlas of genetic influences on osteoporosis in humans and mice.; Leveraging Polygenic Functional Enrichment to Improve GWAS Power.; Identification of 613 new loci associated w…	30595370; 30048462; 30598549; 30595370; 30048462; 30598549	6e-135; 6e-135	0.0503959; 0.0504377; 0.0503959; 0.0504377	CCDC34; CCDC34	50936; 50936	intergenic; intergenic	2.462; 2.462	7.0; 7.0	0.0; 0.0	0.0; 0.0	0.0; 0.0
27; 25	11:110956784:A:T; 11:110956784:A:T	rs321414; rs321414	11	110956784; 110956784	1.83141e-12; 2.20877e-11	110945939	111040637	59; 59	54; 54	1; 1	rs321414; rs321414	1; 1	rs321414; rs321414	mocov2_T1; mocov2_T2	rs321414; rs321414										Vertex-wise sulcal depth; Vertex-wise cortical thickness; Whole brain restricted isotropic diffusion (multivariate analysis); Whole brain restricted directional diffusion (multivariate analysis); Whole brain free water diffusion (multivariate analysis); Vertex-wise sulcal depth; Vertex-wise cortical thickness; Whole brain restricted isotropic diffusion (multivariate analysis); Whole brain restric…	The genetic architecture of human cortical folding.; Multivariate genome-wide association study on tissue-sensitive diffusion metrics highlights pathways that shape the human brain.; The genetic architecture of human cortical folding.; Multivariate genome-wide association study on tissue-sensitive diffusion metrics highlights pathways that shape the human brain.	34910505; 35505052; 34910505; 35505052	2e-121; 2e-121	23.44; 15.53; 23.44; 15.53	RP11-89C3.3; RP11-89C3.3	3809; 3809	intergenic; intergenic	3.327; 3.327	5.0; 5.0	0.0; 0.0	0.0; 0.0	0.0; 0.0
29; 26	12:28238905:A:G; 12:28238905:A:G	rs61920200; rs61920200	12	28238905; 28238905	4.05618e-13; 1.34584e-12	28220482	28740649	993; 877	830; 733	7; 4	rs61920200;rs7305790;rs7961407;rs1511548;rs10843210;rs11049546;rs1002863; rs61920200;rs12229872;rs6898699;rs4930826	2; 2	rs61920200;rs10843210; rs61920200;rs4930826	mocov2_T1; mocov2_T2	rs61920200; rs61920200	CCDC91; CCDC91	ENSG00000123106; ENSG00000123106	55297; 55297.0	CCDC91; CCDC91	3.15157303302004e-05; 3.15157303302004e-05	0.458621643; 0.458621643	941.0; 812.0	19.67; 19.67	8.5004e-12; 2.12633e-11	Height; Vertex-wise sulcal depth; Lung function (FVC); Whole brain restricted isotropic diffusion (multivariate analysis); Height; Vertex-wise sulcal depth; Lung function (FVC); Whole brain restricted isotropic diffusion (multivariate analysis)	Leveraging Polygenic Functional Enrichment to Improve GWAS Power.; The genetic architecture of human cortical folding.; New genetic signals for lung function highlight pathways and chronic obstructive pulmonary disease associations across multiple ancestries.; Multivariate genome-wide association study on tissue-sensitive diffusion metrics highlights pathways that shape the human brain.; Leveragi…	30595370; 34910505; 30804560; 35505052; 30595370; 34910505; 30804560; 35505052	2.9999999999999998e-114; 2.9999999999999998e-114	20.5; 20.5	CCDC91; CCDC91	47276; 47276	intergenic; intergenic	3.21; 3.21	7.0; 7.0	0.0; 0.0	0.0; 0.0	0.0; 0.0
30; 27	12:53657467:A:G; 12:53657467:A:G	rs10783562; rs10783562	12	53657467; 53657467	8.3348e-13; 7.96716e-13	53649874	53752204	70; 70	58; 58	1; 1	rs10783562; rs10783562	1; 1	rs10783562; rs10783562	mocov2_T1; mocov2_T2	rs10783562; rs10783562	MFSD5; ESPL1; PFDN5; C12orf10; AAAS; SP7; MFSD5; ESPL1; PFDN5; C12orf10; AAAS; SP7	ENSG00000182544; ENSG00000135476; ENSG00000123349; ENSG00000139637; ENSG00000094914; ENSG00000170374; ENSG00000182544; ENSG00000135476; ENSG00000123349; ENSG00000139637; ENSG00000094914; ENSG00000170374	84975; 9700; 5204; 60314; 8086; 121340; 84975.0; 9700.0; 5204.0; 60314.0; 8086.0; 121340.0	MFSD5; ESPL1; PFDN5; C12orf10; AAAS; SP7; MFSD5; ESPL1; PFDN5; C12orf10; AAAS; SP7	0.3014995795073187; 0.3014995795073187	-0.1335908585; -0.1335908585	93.0; 93.0	23.7; 23.7	8.3348e-13; 7.96716e-13	Liver enzyme levels (alkaline phosphatase); Serum alkaline phosphatase levels; Lumbar spine bone mineral density; Liver enzyme levels (alkaline phosphatase); Serum alkaline phosphatase levels; Lumbar spine bone mineral density	Genetic analysis in European ancestry individuals identifies 517 loci associated with liver enzymes.; A cross-population atlas of genetic associations for 220 human phenotypes.; Genetics of 35 blood and urine biomarkers in the UK Biobank.; Genome-wide meta-analysis identifies 56 bone mineral density loci and reveals 14 loci associated with risk of fracture.; Genome-wide association study of serum…	33972514; 34594039; 33462484; 22504420; 33547301; 33972514; 34594039; 33462484; 22504420; 33547301	1e-41; 1e-41	0.00327436; 0.0281; 0.0279; 0.00327436; 0.0281; 0.0279	ESPL1; ESPL1	4615; 4615	intergenic; intergenic	0.014; 0.014	7.0; 7.0	1.0; 1.0	0.0; 0.0	0.0; 0.0
31; 28	12:65905126:C:T; 12:65905126:C:T	rs79487293; rs79487293	12	65905126; 65905126	3.40414e-13; 9.52235e-11	65905126	65905126	1; 1	1; 1	1; 1	rs79487293; rs79487293	1; 1	rs79487293; rs79487293	mocov2_T1; mocov2_T2	rs79487293; rs79487293										Vertex-wise sulcal depth; Vertex-wise cortical thickness; Whole brain restricted isotropic diffusion (multivariate analysis); Whole brain restricted directional diffusion (multivariate analysis); Whole brain free water diffusion (multivariate analysis); Vertex-wise sulcal depth; Vertex-wise cortical thickness; Whole brain restricted isotropic diffusion (multivariate analysis); Whole brain restric…	The genetic architecture of human cortical folding.; Multivariate genome-wide association study on tissue-sensitive diffusion metrics highlights pathways that shape the human brain.; The genetic architecture of human cortical folding.; Multivariate genome-wide association study on tissue-sensitive diffusion metrics highlights pathways that shape the human brain.	34910505; 35505052; 34910505; 35505052	3e-110; 3e-110	22.31; 14.0; 22.31; 14.0	RP11-230G5.2; RP11-230G5.2	0; 0	ncRNA_intronic; ncRNA_intronic	17.35; 17.35	4.0; 4.0	0.0; 0.0	0.0; 0.0	0.0; 0.0
32; 29	12:106476805:C:T; 12:106476805:C:T	rs12146713; rs12146713	12	106476805; 106476805	1.87509e-17; 1.24314e-15	106476805	106510413	153; 3	139; 3	3; 1	rs2248542;rs12146713;rs17038091; rs12146713	2; 1	rs2248542;rs12146713; rs12146713	mocov2_T1; mocov2_T2	rs2248542; rs12146713	NUAK1; NUAK1	ENSG00000074590; ENSG00000074590	9891; 9891.0	NUAK1; NUAK1	0.189029672518911; 0.189029672518911	0.541314246; 0.541314246	18.0; 3.0	19.59; 19.59	1.87509e-17; 1.24314e-15	Vertex-wise sulcal depth; Whole brain restricted isotropic diffusion (multivariate analysis); Whole brain free water diffusion (multivariate analysis); Whole brain restricted directional diffusion (multivariate analysis); Vertex-wise cortical surface area; Vertex-wise sulcal depth; Whole brain restricted isotropic diffusion (multivariate analysis); Whole brain free water diffusion (multivariate a…	The genetic architecture of human cortical folding.; Multivariate genome-wide association study on tissue-sensitive diffusion metrics highlights pathways that shape the human brain.; The genetic architecture of human cortical folding.; Multivariate genome-wide association study on tissue-sensitive diffusion metrics highlights pathways that shape the human brain.	34910505; 35505052; 34910505; 35505052	1e-260; 1e-260	34.48; 34.48	ST13P3; NUAK1	40436; 0	intergenic; intronic	2.204; 19.59	5.0; 5.0	0.0; 1.0	0.0; 0.0	0.0; 0.0
33; 30	14:54422399:C:G; 14:54425052:A:C	rs2738265; rs2761887	14	54422399; 54425052	7.87559e-13; 2.88544e-10	54419965	54435054	16; 16	11; 11	1; 1	rs2738265; rs2761887	1; 1	rs2738265; rs2761887	mocov2_T1; mocov2_T2	rs2738265; rs2761887	BMP4; BMP4	ENSG00000125378; ENSG00000125378	652; 652.0	BMP4; BMP4	0.967466005226941; 0.967466005226941	-0.512221976; -0.512221976	16.0; 16.0	16.33; 16.33	7.87559e-13; 2.88544e-10	Heel bone mineral density; Spherical equivalent; Whole brain restricted isotropic diffusion (multivariate analysis); Bone stiffness index; Heel bone mineral density; Spherical equivalent; Whole brain restricted isotropic diffusion (multivariate analysis); Bone stiffness index	Identification of 613 new loci associated with heel bone mineral density and a polygenic risk score for bone mineral density, osteoporosis and fracture.; An atlas of genetic influences on osteoporosis in humans and mice.; Association of Myopia and Intraocular Pressure With Retinal Detachment in European Descent Participants of the UK Biobank Cohort: A Mendelian Randomization Study.; Multivariate …	30048462; 30598549; 32352494; 35505052; 36329257; 30048462; 30598549; 32352494; 35505052; 36329257	2e-110; 2e-110	0.0476138; 0.0280415; 0.12; 0.0476138; 0.0280415; 0.12	BMP4; BMP4	0; 0	intronic; intronic	8.101; 2.442	4.0	1.0; 1.0	0.0; 0.0	0.0; 0.0
35; 31	16:87225101:A:G; 16:87225101:A:G	rs9937293; rs9937293	16	87225101; 87225101	4.29416e-16; 3.06658e-16	87220694	87258088	77; 83	67; 72	4; 4	rs9937293;rs4240791;rs1108048;rs12919133; rs9937293;rs4240789;rs1108048;rs10863183	1; 1	rs9937293; rs9937293	mocov2_T1; mocov2_T2	rs9937293; rs9937293	C16orf95; C16orf95	ENSG00000260456; ENSG00000260456	100506581; 100506581.0	C16orf95; C16orf95		0.915813928; 0.915813928	77.0; 83.0	16.49; 16.49	4.29416e-16; 3.06658e-16	Vertex-wise sulcal depth; Vertex-wise cortical thickness; Vertex-wise cortical surface area; Whole brain free water diffusion (multivariate analysis); Whole brain restricted isotropic diffusion (multivariate analysis); Vertex-wise sulcal depth; Vertex-wise cortical thickness; Vertex-wise cortical surface area; Whole brain free water diffusion (multivariate analysis); Whole brain restricted isotro…	The genetic architecture of human cortical folding.; Multivariate genome-wide association study on tissue-sensitive diffusion metrics highlights pathways that shape the human brain.; The genetic architecture of human cortical folding.; Multivariate genome-wide association study on tissue-sensitive diffusion metrics highlights pathways that shape the human brain.	34910505; 35505052; 34910505; 35505052	5e-324; 5e-324	33.41; 26.92; 33.41; 26.92	C16orf95; C16orf95	0; 0	intergenic; intergenic	1.793; 1.793	7.0; 7.0	1.0; 1.0	0.0; 0.0	0.0; 0.0
Supp Table 1 Overlap of MM-UDIP loci T1 T2

## Sheet: Table2-New loci MM-UDIP
GenomicLocus	uniqID	rsID	chr	pos	p	start	end	nSNPs	nGWASSNPs	nIndSigSNPs	IndSigSNPs	nLeadSNPs	LeadSNPs	SOURCE	Unique to ViT	Unique to CNN	Unique to IDP	ensg	GWAS_Trait	GWAS_Study	GWAS_PMID	GWAS_P_min
1	1:22706434:C:T	rs6684375	1	22706434	8.4188e-11	22556214	22836474	38	38	1	rs6684375	1	rs6684375	mocov2_T2	TRUE	TRUE	TRUE		Heel bone mineral density; Heel bone mineral density; Heel bone mineral density; Heel bone mineral density; Femoral neck bone mineral density	Leveraging Polygenic Functional Enrichment to Improve GWAS Power.; An atlas of genetic influences on osteoporosis in humans and mice.; Identification of 613 new loci associated with heel bone mineral density and a polygenic risk score for bone mineral density, osteoporosis and fracture.; Identification of 613 new loci associated with heel bone mineral density and a polygenic risk score for bone m…	30595370; 30598549; 30048462; 30048462; 22504420	6e-147; 1e-139; 1.0000000000000001e-126; 2.0000000000000002e-126; 7e-57
1; 2	1:47980916:G:T; 1:47974123:C:T	rs6658111; rs61784835	1	47980916; 47974123	1.2486e-18; 1.10482e-16	47820825	48118333	14; 4	13; 3	3; 2	rs6658111;rs72688340;rs12118339; rs61784835;rs12143164	1; 1	rs6658111; rs61784835	mocov2_T1; mocov2_T2	FALSE	FALSE	FALSE		Vertex-wise sulcal depth; Whole brain restricted directional diffusion (multivariate analysis); Whole brain restricted isotropic diffusion (multivariate analysis); Vertex-wise cortical thickness; Whole brain free water diffusion (multivariate analysis); Vertex-wise sulcal depth; Whole brain restricted directional diffusion (multivariate analysis); Whole brain restricted isotropic diffusion (multi…	The genetic architecture of human cortical folding.; Multivariate genome-wide association study on tissue-sensitive diffusion metrics highlights pathways that shape the human brain.; Multivariate genome-wide association study on tissue-sensitive diffusion metrics highlights pathways that shape the human brain.; The genetic architecture of human cortical folding.; Multivariate genome-wide associat…	34910505; 35505052; 35505052; 34910505; 35505052; 34910505; 35505052; 35505052; 34910505; 35505052	5e-324; 8e-265; 2.0000000000000003e-237; 4e-229; 2.0000000000000002e-212; 5e-324; 8e-265; 2.0000000000000003e-237; 4e-229; 2.0000000000000002e-212
3; 2	1:215139887:A:T; 1:215137222:A:C	rs1452628; rs6540873	1	215139887; 215137222	2.83802e-12; 1.78949e-13	215009041	215278068	21; 20	20; 19	1; 1	rs1452628; rs6540873	1; 1	rs1452628; rs6540873	mocov2_T2; mocov2_T1	FALSE	FALSE	TRUE		Vertex-wise cortical thickness; Whole brain free water diffusion (multivariate analysis); Whole brain restricted directional diffusion (multivariate analysis); Whole brain restricted isotropic diffusion (multivariate analysis); Vertex-wise sulcal depth; Vertex-wise cortical thickness; Whole brain free water diffusion (multivariate analysis); Whole brain restricted directional diffusion (multivari…	The genetic architecture of human cortical folding.; Multivariate genome-wide association study on tissue-sensitive diffusion metrics highlights pathways that shape the human brain.; Multivariate genome-wide association study on tissue-sensitive diffusion metrics highlights pathways that shape the human brain.; Multivariate genome-wide association study on tissue-sensitive diffusion metrics highl…	34910505; 35505052; 35505052; 35505052; 34910505; 34910505; 35505052; 35505052; 35505052; 34910505	5.9999999999999995e-142; 9e-80; 2e-73; 6e-63; 9e-35; 5.9999999999999995e-142; 9e-80; 2e-73; 6e-63; 9e-35
3	2:18711415:C:T	rs4832441	2	18711415	4.87443e-12	18577074	18847425	15	14	1	rs4832441	1	rs4832441	mocov2_T1	FALSE	FALSE	TRUE		Whole brain restricted isotropic diffusion (multivariate analysis); Whole brain restricted directional diffusion (multivariate analysis); Whole brain free water diffusion (multivariate analysis); Vertex-wise cortical thickness; Sex hormone-binding globulin levels adjusted for BMI	Multivariate genome-wide association study on tissue-sensitive diffusion metrics highlights pathways that shape the human brain.; Multivariate genome-wide association study on tissue-sensitive diffusion metrics highlights pathways that shape the human brain.; Multivariate genome-wide association study on tissue-sensitive diffusion metrics highlights pathways that shape the human brain.; The genet…	35505052; 35505052; 35505052; 34910505; 32042192	5e-36; 9e-31; 1e-27; 7e-14; 5e-11
4	2:33764176:A:G	rs13388394	2	33764176	3.3613e-11	33639176	33889177	1	1	1	rs13388394	1	rs13388394	mocov2_T1	TRUE	TRUE	FALSE	RASGRP3	wg rh intensity-contrast parahippocampal; White matter microstructure (mode of anisotropy); aseg rh volume Cerebellum-White-Matter; Brain morphology (MOSTest); Subcortical volume (MOSTest)	An expanded set of genome-wide association studies of brain imaging phenotypes in UK Biobank.; Large-scale GWAS reveals genetic architecture of brain white matter microstructure and genetic overlap with cognitive and mental health traits (n = 17,706).; An expanded set of genome-wide association studies of brain imaging phenotypes in UK Biobank.; Boosting Schizophrenia Genetics by Utilizing Geneti…	33875891; 31666681; 33875891; 35164939; 32665545	3e-14; 5e-11; 6e-10; 1e-09; 2e-09
4; 5	2:65977031:C:G; 2:65977031:C:G	rs6546176; rs6546176	2	65977031; 65977031	5.07143e-15; 8.35324e-18	65818194	66124624	68; 69	60; 61	2; 2	rs6546176;rs12989218; rs6546176;rs6709906	1; 1	rs6546176; rs6546176	mocov2_T2; mocov2_T1	FALSE	FALSE	TRUE		Vertex-wise sulcal depth; Whole brain restricted directional diffusion (multivariate analysis); Vertex-wise cortical surface area; Brain shape (segment 22); Vertex-wise cortical thickness; Vertex-wise sulcal depth; Whole brain restricted directional diffusion (multivariate analysis); Vertex-wise cortical surface area; Brain shape (segment 22); Vertex-wise cortical thickness	The genetic architecture of human cortical folding.; Multivariate genome-wide association study on tissue-sensitive diffusion metrics highlights pathways that shape the human brain.; The genetic architecture of human cortical folding.; Shared heritability of human face and brain shape.; The genetic architecture of human cortical folding.; The genetic architecture of human cortical folding.; Multi…	34910505; 35505052; 34910505; 33821002; 34910505; 34910505; 35505052; 34910505; 33821002; 34910505	1e-240; 2e-99; 1e-78; 1e-74; 1.0000000000000001e-72; 1e-240; 2e-99; 1e-78; 1e-74; 1.0000000000000001e-72
6; 5	2:71961307:C:T; 2:71961307:C:T	rs12466122; rs12466122	2	71961307; 71961307	1.78038e-13; 1.43902e-12	71826050	72134918	66; 66	59; 59	2; 2	rs12466122;rs13033431; rs12466122;rs13033431	1; 1	rs12466122; rs12466122	mocov2_T1; mocov2_T2	FALSE	FALSE	TRUE		Whole brain restricted isotropic diffusion (multivariate analysis); Vertex-wise sulcal depth; Height; Whole brain restricted directional diffusion (multivariate analysis); Appendicular lean mass; Whole brain restricted isotropic diffusion (multivariate analysis); Vertex-wise sulcal depth; Height; Whole brain restricted directional diffusion (multivariate analysis); Appendicular lean mass	Multivariate genome-wide association study on tissue-sensitive diffusion metrics highlights pathways that shape the human brain.; The genetic architecture of human cortical folding.; Leveraging Polygenic Functional Enrichment to Improve GWAS Power.; Multivariate genome-wide association study on tissue-sensitive diffusion metrics highlights pathways that shape the human brain.; The genetic archite…	35505052; 34910505; 30595370; 35505052; 33097823; 35505052; 34910505; 30595370; 35505052; 33097823	6e-26; 6e-26; 8e-20; 9e-14; 6e-13; 6e-26; 6e-26; 8e-20; 9e-14; 6e-13
6	3:66027343:A:G	rs73833356	3	66027343	8.01482e-14	65902343	66174889	36	32	1	rs73833356	1	rs73833356	mocov2_T2	FALSE	FALSE	TRUE	MAGI1	Vertex-wise sulcal depth; Vertex-wise cortical surface area; Whole brain restricted directional diffusion (multivariate analysis); Whole brain restricted isotropic diffusion (multivariate analysis); Brain shape (segment 1)	The genetic architecture of human cortical folding.; The genetic architecture of human cortical folding.; Multivariate genome-wide association study on tissue-sensitive diffusion metrics highlights pathways that shape the human brain.; Multivariate genome-wide association study on tissue-sensitive diffusion metrics highlights pathways that shape the human brain.; Shared heritability of human face…	34910505; 34910505; 35505052; 35505052; 33821002	6.000000000000001e-107; 3e-41; 5.0000000000000004e-29; 6e-23; 9.000000000000001e-23
7	3:133466374:A:G	rs4428180	3	133466374	9.89488e-11	133308523	133604201	28	27	2	rs4428180;rs8177186	1	rs4428180	mocov2_T2	TRUE	TRUE	TRUE	TF	IDP SWI T2star left putamen; IDP SWI T2star right putamen; Whole brain restricted isotropic diffusion (multivariate analysis); IDP SWI T2star right pallidum; IDP SWI T2star left caudate	An expanded set of genome-wide association studies of brain imaging phenotypes in UK Biobank.; An expanded set of genome-wide association studies of brain imaging phenotypes in UK Biobank.; Multivariate genome-wide association study on tissue-sensitive diffusion metrics highlights pathways that shape the human brain.; An expanded set of genome-wide association studies of brain imaging phenotypes …	33875891; 33875891; 35505052; 33875891; 33875891	2.0000000000000003e-45; 8e-41; 6e-27; 3e-25; 4.0000000000000004e-24
7	3:138696439:C:T	rs9809852	3	138696439	3.43729e-10	138571439	138821440	1	1	1	rs9809852	1	rs9809852	mocov2_T1	TRUE	FALSE	TRUE		Vertex-wise sulcal depth; Vertex-wise cortical thickness; Cortical thickness; Cortical surface area; Vertex-wise cortical surface area	The genetic architecture of human cortical folding.; The genetic architecture of human cortical folding.; Vertex-wise multivariate genome-wide association study identifies 780 unique genetic loci associated with cortical morphology.; Vertex-wise multivariate genome-wide association study identifies 780 unique genetic loci associated with cortical morphology.; The genetic architecture of human cor…	34910505; 34910505; 34560273; 34560273; 34910505	7e-59; 2e-27; 1e-17; 1e-17; 1e-17
8	3:147032401:A:G	rs60852193	3	147032401	2.67327e-10	146895326	147201792	34	31	1	rs60852193	1	rs60852193	mocov2_T2	TRUE	FALSE	FALSE		Non-HDL cholesterol levels; Total cholesterol levels; Low density lipoprotein cholesterol levels; Oily fish consumption; Non-HDL cholesterol levels	The power of genetic diversity in genome-wide association studies of lipids.; The power of genetic diversity in genome-wide association studies of lipids.; Phenotypic and Genetic Characterization of Lower LDL-C and Increased Type-2 Diabetes Risk in the UK Biobank.; Genome-wide association study of dietary intake in the UK biobank study and its associations with schizophrenia and other traits.; Th…	34887591; 34887591; 32493714; 32066663; 34887591	4e-10; 4e-09; 1e-08; 2e-08; 2e-08
8	3:177310993:G:T	rs35614773	3	177310993	5.91875e-12	177148816	177470127	153	119	3	rs35614773;rs4857613;rs7613181	1	rs35614773	mocov2_T1	FALSE	FALSE	TRUE		Vertex-wise cortical thickness; Whole brain restricted isotropic diffusion (multivariate analysis); Brain morphology (MOSTest); Cortical thickness; Central corneal thickness	The genetic architecture of human cortical folding.; Multivariate genome-wide association study on tissue-sensitive diffusion metrics highlights pathways that shape the human brain.; Boosting Schizophrenia Genetics by Utilizing Genetic Overlap With Brain Morphology.; Vertex-wise multivariate genome-wide association study identifies 780 unique genetic loci associated with cortical morphology.; A m…	34910505; 35505052; 35164939; 34560273; 32528159	1.0000000000000001e-49; 2.0000000000000002e-39; 6e-23; 1e-17; 4e-16
9; 9	3:190640134:A:T; 3:190641068:G:T	rs4308324; rs58531798	3	190640134; 190641068	4.02188e-13; 4.72269e-14	190467836	190803744	169; 183	120; 131	1; 1	rs4308324; rs58531798	1; 1	rs4308324; rs58531798	mocov2_T1; mocov2_T2	FALSE	FALSE	FALSE	GMNC; GMNC	Vertex-wise sulcal depth; Brain morphology (MOSTest); Vertex-wise cortical thickness; Brain morphology (MOSTest); Vertex-wise cortical surface area; Vertex-wise sulcal depth; Brain morphology (MOSTest); Vertex-wise cortical thickness; Brain morphology (MOSTest); Vertex-wise cortical surface area	The genetic architecture of human cortical folding.; Boosting Schizophrenia Genetics by Utilizing Genetic Overlap With Brain Morphology.; The genetic architecture of human cortical folding.; Understanding the genetic determinants of the brain with MOSTest.; The genetic architecture of human cortical folding.; The genetic architecture of human cortical folding.; Boosting Schizophrenia Genetics by …	34910505; 35164939; 34910505; 32665545; 34910505; 34910505; 35164939; 34910505; 32665545; 34910505	9.999999999999999e-129; 9.000000000000001e-105; 1e-77; 1.0000000000000001e-72; 1e-71; 9.999999999999999e-129; 9.000000000000001e-105; 1e-77; 1.0000000000000001e-72; 1e-71
10; 10	4:103198082:A:G; 4:103188709:C:T	rs13135092; rs13107325	4	103198082; 103188709	1.30637e-14; 8.82769e-17	102577364	103512162	25; 30	25; 30	2; 4	rs13135092;rs34333163; rs13107325;rs34333163;rs34592089;rs6855246	1; 1	rs13135092; rs13107325	mocov2_T2; mocov2_T1	FALSE	FALSE	FALSE	BANK1; SLC39A8; BANK1; SLC39A8	High density lipoprotein cholesterol levels; Vertex-wise cortical thickness; Brain morphology (MOSTest); Liver fibrosis and steatohepatitis severity (MRI cT1 measure); Whole brain restricted isotropic diffusion (multivariate analysis); High density lipoprotein cholesterol levels; Vertex-wise cortical thickness; Brain morphology (MOSTest); Liver fibrosis and steatohepatitis severity (MRI cT1 measu…	The power of genetic diversity in genome-wide association studies of lipids.; The genetic architecture of human cortical folding.; Boosting Schizophrenia Genetics by Utilizing Genetic Overlap With Brain Morphology.; Genome-wide and Mendelian randomisation studies of liver MRI yield insights into the pathogenesis of steatohepatitis.; Multivariate genome-wide association study on tissue-sensitive d…	34887591; 34910505; 35164939; 32247823; 35505052; 34887591; 34910505; 35164939; 32247823; 35505052	1e-185; 6e-175; 6e-169; 1e-133; 6.000000000000001e-125; 1e-185; 6e-175; 6e-169; 1e-133; 6.000000000000001e-125
11	5:171128464:C:T	rs6555969	5	171128464	1.30846e-12	171002549	171291686	12	7	1	rs6555969	1	rs6555969	mocov2_T1	FALSE	FALSE	TRUE		Vertex-wise sulcal depth; Whole brain restricted isotropic diffusion (multivariate analysis); Vertex-wise cortical surface area; Whole brain restricted directional diffusion (multivariate analysis); Brain shape (segment 1)	The genetic architecture of human cortical folding.; Multivariate genome-wide association study on tissue-sensitive diffusion metrics highlights pathways that shape the human brain.; The genetic architecture of human cortical folding.; Multivariate genome-wide association study on tissue-sensitive diffusion metrics highlights pathways that shape the human brain.; Shared heritability of human face…	34910505; 35505052; 34910505; 35505052; 33821002	1e-96; 7.999999999999999e-32; 1e-27; 9.999999999999999e-26; 1e-18
11	6:25804921:A:T	rs78833965	6	25804921	5.30613e-12	25491453	26248503	14	14	2	rs78833965;rs1800562	1	rs78833965	mocov2_T2	FALSE	TRUE	FALSE	CARMIL1; SLC17A1; SLC17A3; SLC17A2; HFE; H4C3; H1-6; H2BC4; H2AC6	Mean corpuscular volume; Mean corpuscular hemoglobin; Mean corpuscular volume; Mean corpuscular hemoglobin concentration; Mean corpuscular volume	The Polygenic and Monogenic Basis of Blood Traits and Diseases.; The Allelic Landscape of Human Blood Cell Trait Variation and Links to Common Complex Disease.; The Allelic Landscape of Human Blood Cell Trait Variation and Links to Common Complex Disease.; Trans-ethnic and Ancestry-Specific Blood-Cell Genetics in 746,667 Individuals from 5 Global Populations.; A cross-population atlas of genetic …	32888494; 27863252; 27863252; 32888493; 34594039	0.0; 0.0; 0.0; 0.0; 0.0
12	6:29352297:A:C	rs238871	6	29352297	1.32185e-10	29102117	29479810	77	69	1	rs238871	1	rs238871	mocov2_T2	TRUE	FALSE	FALSE	OR14J1; OR5V1; OR12D3; OR12D2	Platelet-to-lymphocyte ratio; Waist circumference adjusted for body mass index; Insomnia; Platelet-to-lymphocyte ratio	Genetic determinants of blood-cell traits influence susceptibility to childhood acute lymphoblastic leukemia.; GWAS of allometric body-shape indices in UK Biobank identifies loci suggesting associations with morphogenesis, organogenesis, adrenal cell renewal and cancer.; Genome-wide meta-analysis of insomnia prioritizes genes associated with metabolic and psychiatric pathways.; Genetic determinan…	34469753; 34021172; 35835914; 34469753	5e-24; 2e-10; 9e-09; 5e-08
13; 12	6:126851160:C:T; 6:126751921:C:T	rs1490384; rs9401881	6	126851160; 126751921	5.03317e-14; 5.05279e-11	126532472	127205701	255; 252	208; 205	2; 1	rs1490384;rs58321169; rs9401881	1; 1	rs1490384; rs9401881	mocov2_T2; mocov2_T1	FALSE	FALSE	FALSE	CENPW; CENPW	Height; Vertex-wise sulcal depth; Appendicular lean mass; Height; Vertex-wise cortical thickness; Height; Vertex-wise sulcal depth; Appendicular lean mass; Height; Vertex-wise cortical surface area	Leveraging Polygenic Functional Enrichment to Improve GWAS Power.; The genetic architecture of human cortical folding.; The genetic architecture of appendicular lean mass characterized by association analysis in the UK Biobank study.; A cross-population atlas of genetic associations for 220 human phenotypes.; The genetic architecture of human cortical folding.; Leveraging Polygenic Functional Enr…	30595370; 34910505; 33097823; 34594039; 34910505; 30595370; 34910505; 33097823; 34594039; 34910505	3e-166; 8e-161; 9.999999999999999e-131; 2e-103; 9.999999999999999e-92; 3e-166; 8e-161; 9.999999999999999e-131; 2e-103; 3e-102
13; 14	6:151021722:A:G; 6:151021722:A:G	rs12206172; rs12206172	6	151021722; 151021722	3.20153e-12; 2.28546e-11	150890996	151166353	44; 26	39; 22	2; 1	rs12206172;rs2279629; rs12206172	1; 1	rs12206172; rs12206172	mocov2_T1; mocov2_T2	TRUE	TRUE	TRUE	PLEKHG1; PLEKHG1	Whole brain restricted isotropic diffusion (multivariate analysis); Whole brain free water diffusion (multivariate analysis); White matter hyperintensities; Vertex-wise cortical thickness; White matter hyperintensity volume; Whole brain restricted isotropic diffusion (multivariate analysis); Whole brain free water diffusion (multivariate analysis); White matter hyperintensities; Vertex-wise corti…	Multivariate genome-wide association study on tissue-sensitive diffusion metrics highlights pathways that shape the human brain.; Multivariate genome-wide association study on tissue-sensitive diffusion metrics highlights pathways that shape the human brain.; Genome-wide association study of MRI markers of cerebral small vessel disease in 42,310 participants.; The genetic architecture of human co…	35505052; 35505052; 32358547; 34910505; 33293549; 35505052; 35505052; 32358547; 34910505; 33293549	1.0000000000000001e-23; 3e-18; 9e-17; 2e-16; 7e-15; 1.0000000000000001e-23; 3e-18; 9e-17; 2e-16; 7e-15
15; 14	6:151872448:G:T; 6:151857594:A:G	rs9479068; rs6931664	6	151872448; 151857594	6.3873e-12; 6.17876e-13	151722381	152037704	98; 98	87; 87	3; 3	rs9479068;rs66775662;rs4870045; rs6931664;rs66775662;rs4870045	1; 1	rs9479068; rs6931664	mocov2_T2; mocov2_T1	FALSE	TRUE	TRUE	CCDC170; CCDC170	Heel bone mineral density; Heel bone mineral density; Heel bone mineral density; Heel bone mineral density; Heel bone mineral density; Heel bone mineral density; Heel bone mineral density; Heel bone mineral density; Heel bone mineral density; Heel bone mineral density	Identification of 613 new loci associated with heel bone mineral density and a polygenic risk score for bone mineral density, osteoporosis and fracture.; Leveraging Polygenic Functional Enrichment to Improve GWAS Power.; Identification of 613 new loci associated with heel bone mineral density and a polygenic risk score for bone mineral density, osteoporosis and fracture.; Identification of 613 ne…	30048462; 30595370; 30048462; 30048462; 30048462; 30048462; 30595370; 30048462; 30048462; 30048462	0.0; 1e-300; 1e-300; 1e-300; 5.0000000000000005e-255; 0.0; 1e-300; 1e-300; 1e-300; 5.0000000000000005e-255
15; 16	7:2863574:A:G; 7:2863574:A:G	rs2107964; rs2107964	7	2863574; 2863574	3.0693e-18; 3.53786e-21	2627152	3037929	222; 230	180; 186	3; 5	rs2107964;rs1713913;rs798512; rs2107964;rs1713913;rs1183079;rs798512;rs7790322	1; 1	rs2107964; rs2107964	mocov2_T1; mocov2_T2	FALSE	FALSE	FALSE	AMZ1; GNA12; AMZ1; GNA12	Height; Height; Height; Appendicular lean mass; Height; Height; Height; Height; Appendicular lean mass; Height	Leveraging Polygenic Functional Enrichment to Improve GWAS Power.; A cross-population atlas of genetic associations for 220 human phenotypes.; Defining the role of common variation in the genomic and biological architecture of adult human height.; The genetic architecture of appendicular lean mass characterized by association analysis in the UK Biobank study.; Characterizing rare and low-frequenc…	30595370; 34594039; 25282103; 33097823; 31562340; 30595370; 34594039; 25282103; 33097823; 31562340	2e-241; 1e-168; 2e-71; 3e-68; 2.9999999999999998e-55; 2e-241; 1e-168; 2e-71; 3e-68; 2.9999999999999998e-55
16; 17	7:19611753:C:T; 7:19611753:C:T	rs10807794; rs10807794	7	19611753; 19611753	1.27035e-15; 1.17071e-17	19423842	19779202	307; 280	265; 246	4; 2	rs10807794;rs6461447;rs12668640;rs4719563; rs10807794;rs6461447	1; 1	rs10807794; rs10807794	mocov2_T1; mocov2_T2	FALSE	FALSE	FALSE		Vertex-wise sulcal depth; Whole brain restricted directional diffusion (multivariate analysis); Whole brain restricted isotropic diffusion (multivariate analysis); Vertex-wise cortical thickness; Whole brain free water diffusion (multivariate analysis); Vertex-wise sulcal depth; Whole brain restricted directional diffusion (multivariate analysis); Whole brain restricted isotropic diffusion (multi…	The genetic architecture of human cortical folding.; Multivariate genome-wide association study on tissue-sensitive diffusion metrics highlights pathways that shape the human brain.; Multivariate genome-wide association study on tissue-sensitive diffusion metrics highlights pathways that shape the human brain.; The genetic architecture of human cortical folding.; Multivariate genome-wide associat…	34910505; 35505052; 35505052; 34910505; 35505052; 34910505; 35505052; 35505052; 34910505; 35505052	3e-267; 2e-98; 4e-89; 6e-82; 1e-65; 3e-267; 2e-98; 4e-89; 6e-82; 1e-65
17	7:33204682:C:T	rs62449325	7	33204682	7.7689e-12	33041801	33469750	43	36	1	rs62449325	1	rs62449325	mocov2_T1	FALSE	FALSE	TRUE	BBS9	Vertex-wise sulcal depth; Vertex-wise cortical surface area; Whole brain restricted directional diffusion (multivariate analysis); Sagittal craniosynostosis; Whole brain restricted isotropic diffusion (multivariate analysis)	The genetic architecture of human cortical folding.; The genetic architecture of human cortical folding.; Multivariate genome-wide association study on tissue-sensitive diffusion metrics highlights pathways that shape the human brain.; A genome-wide association study identifies susceptibility loci for nonsyndromic sagittal craniosynostosis near BMP2 and within BBS9.; Multivariate genome-wide asso…	34910505; 34910505; 35505052; 23160099; 35505052	1e-107; 6e-35; 3e-23; 6e-20; 9e-18
18	7:96210219:C:T	rs201650162	7	96210219	2.35289e-12	96025233	96379520	141	114	1	rs201650162	1	rs201650162	mocov2_T1	FALSE	FALSE	FALSE	SEM1	Vertex-wise sulcal depth; Vertex-wise cortical surface area; Vertex-wise cortical thickness; Whole brain restricted directional diffusion (multivariate analysis); Facial morphology (segment 54)	The genetic architecture of human cortical folding.; The genetic architecture of human cortical folding.; The genetic architecture of human cortical folding.; Multivariate genome-wide association study on tissue-sensitive diffusion metrics highlights pathways that shape the human brain.; Insights into the genetic architecture of the human face.	34910505; 34910505; 34910505; 35505052; 33288918	5e-324; 6e-153; 4e-93; 3e-82; 8e-74
18; 19	7:120974765:A:G; 7:120974765:A:G	rs3801387; rs3801387	7	120974765; 120974765	1.53088e-60; 1.12328e-46	120578161	121165783	250; 205	213; 176	18; 15	rs4731007;rs798906;rs10233441;rs17509082;rs2707520;rs2707518;rs17356657;rs17284876;rs798908;rs76042375;rs2110279;rs79162867;rs13247600;rs9769381;rs3801387;rs1541509;rs2536189;rs2952565; rs79162867;rs76042375;rs2140648;rs798906;rs10233441;rs17509082;rs2707520;rs2707518;rs12668590;rs17284876;rs13247600;rs12706326;rs9769381;rs3801387;rs2908004	6; 5	rs4731007;rs798908;rs13247600;rs9769381;rs3801387;rs2952565; rs79162867;rs2140648;rs13247600;rs9769381;rs3801387	mocov2_T2; mocov2_T1	FALSE	FALSE	FALSE	CPED1; WNT16; FAM3C; CPED1; WNT16; FAM3C	Heel bone mineral density; Heel bone mineral density; Heel bone mineral density; Heel bone mineral density; Heel bone mineral density; Heel bone mineral density; Heel bone mineral density; Heel bone mineral density; Heel bone mineral density; Heel bone mineral density	Identification of 613 new loci associated with heel bone mineral density and a polygenic risk score for bone mineral density, osteoporosis and fracture.; Identification of 153 new loci associated with heel bone mineral density and functional involvement of GPC6 in osteoporosis.; Identification of 613 new loci associated with heel bone mineral density and a polygenic risk score for bone mineral de…	30048462; 28869591; 30048462; 30595370; 31453325; 30048462; 28869591; 30048462; 30595370; 31453325	0.0; 5e-324; 1e-300; 1e-300; 1e-300; 0.0; 5e-324; 1e-300; 1e-300; 1e-300
20; 19	7:151498679:C:T; 7:151498679:C:T	rs4128399; rs4128399	7	151498679; 151498679	4.84702e-12; 2.69633e-13	151367906	151629499	8; 8	7; 7	2; 2	rs4128399;rs13224758; rs4128399;rs12703159	1; 1	rs4128399; rs4128399	mocov2_T1; mocov2_T2	FALSE	FALSE	TRUE	PRKAG2; PRKAG2	Whole brain restricted isotropic diffusion (multivariate analysis); Whole brain free water diffusion (multivariate analysis); Whole brain restricted directional diffusion (multivariate analysis); Vertex-wise sulcal depth; Vertex-wise cortical thickness; Whole brain restricted isotropic diffusion (multivariate analysis); Whole brain free water diffusion (multivariate analysis); Whole brain restric…	Multivariate genome-wide association study on tissue-sensitive diffusion metrics highlights pathways that shape the human brain.; Multivariate genome-wide association study on tissue-sensitive diffusion metrics highlights pathways that shape the human brain.; Multivariate genome-wide association study on tissue-sensitive diffusion metrics highlights pathways that shape the human brain.; The genet…	35505052; 35505052; 35505052; 34910505; 34910505; 35505052; 35505052; 35505052; 34910505; 34910505	2e-69; 2e-59; 1e-41; 1e-35; 4e-31; 2e-69; 2e-59; 1e-41; 1e-35; 4e-31
20	8:9090902:A:G	rs330060	8	9090902	1.90872e-10	7963230	9274747	177	156	2	rs330060;rs876954	1	rs330060	mocov2_T2	TRUE	FALSE	FALSE	ENSG00000182319; MFHAS1; ENSG00000253426	Heel bone mineral density; Heel bone mineral density; Heel bone mineral density; Heel bone mineral density; Liver enzyme levels (alkaline phosphatase)	Identification of 613 new loci associated with heel bone mineral density and a polygenic risk score for bone mineral density, osteoporosis and fracture.; An atlas of genetic influences on osteoporosis in humans and mice.; Identification of 613 new loci associated with heel bone mineral density and a polygenic risk score for bone mineral density, osteoporosis and fracture.; Identification of 613 n…	30048462; 30598549; 30048462; 30048462; 33972514	2.0000000000000002e-126; 1e-90; 4.0000000000000004e-82; 8.000000000000001e-82; 1.0000000000000001e-66
21	8:74265667:A:G	rs28591268	8	74265667	5.54226e-11	74137063	74393827	9	7	1	rs28591268	1	rs28591268	mocov2_T1	TRUE	TRUE	TRUE
21; 22	8:119952750:A:C; 8:119952750:A:C	rs6469788; rs6469788	8	119952750; 119952750	2.30804e-14; 2.91261e-13	119761923	120188543	158; 154	132; 128	3; 2	rs6469788;rs1385499;rs1485302; rs6469788;rs1485302	1; 1	rs6469788; rs6469788	mocov2_T2; mocov2_T1	FALSE	FALSE	TRUE	TNFRSF11B; COLEC10; TNFRSF11B; COLEC10	Liver enzyme levels (alkaline phosphatase); Serum alkaline phosphatase levels; Serum alkaline phosphatase levels; Lumbar spine bone mineral density; Total body bone mineral density; Liver enzyme levels (alkaline phosphatase); Serum alkaline phosphatase levels; Serum alkaline phosphatase levels; Lumbar spine bone mineral density; Total body bone mineral density	Genetic analysis in European ancestry individuals identifies 517 loci associated with liver enzymes.; A cross-population atlas of genetic associations for 220 human phenotypes.; Genome-wide association study of serum liver enzymes implicates diverse metabolic and liver pathology.; Genome-wide meta-analysis identifies 56 bone mineral density loci and reveals 14 loci associated with risk of fractur…	33972514; 34594039; 33547301; 22504420; 29304378; 33972514; 34594039; 33547301; 22504420; 29304378	3.9999999999999997e-128; 6e-113; 9.999999999999999e-85; 3e-39; 4.999999999999999e-32; 3.9999999999999997e-128; 6e-113; 9.999999999999999e-85; 3e-39; 4.999999999999999e-32
22; 23	9:113665419:A:G; 9:113665419:A:G	rs1409682; rs1409682	9	113665419; 113665419	1.06096e-11; 7.15575e-13	113523136	113909558	105; 101	88; 84	3; 3	rs1409682;rs10817124;rs10980625; rs1409682;rs10817124;rs10817103	1; 1	rs1409682; rs1409682	mocov2_T2; mocov2_T1	FALSE	FALSE	TRUE	LPAR1; LPAR1	Whole brain free water diffusion (multivariate analysis); Vertex-wise cortical thickness; Vertex-wise sulcal depth; Whole brain restricted isotropic diffusion (multivariate analysis); Central corneal thickness; Whole brain free water diffusion (multivariate analysis); Vertex-wise cortical thickness; Vertex-wise sulcal depth; Whole brain restricted isotropic diffusion (multivariate analysis); Cent…	Multivariate genome-wide association study on tissue-sensitive diffusion metrics highlights pathways that shape the human brain.; The genetic architecture of human cortical folding.; The genetic architecture of human cortical folding.; Multivariate genome-wide association study on tissue-sensitive diffusion metrics highlights pathways that shape the human brain.; A multiethnic genome-wide analysi…	35505052; 34910505; 34910505; 35505052; 32528159; 35505052; 34910505; 34910505; 35505052; 32528159	9e-47; 3e-32; 1.0000000000000001e-23; 1e-22; 3e-21; 9e-47; 3e-32; 1.0000000000000001e-23; 1e-22; 3e-21
23	9:114063446:C:T	rs4978988	9	114063446	1.08477e-10	113922460	114188447	3	3	1	rs4978988	1	rs4978988	mocov2_T2	FALSE	FALSE	TRUE		White matter hyperintensity volume; White matter hyperintensity volume	Cerebral small vessel disease genomics and its implications across the lifespan.; Cerebral small vessel disease genomics and its implications across the lifespan.	33293549; 33293549	2e-06; 4e-06
24	10:50290482:A:G	rs34289781	10	50290482	1.87901e-13	50128187	50497348	103	91	1	rs34289781	1	rs34289781	mocov2_T1	FALSE	FALSE	FALSE	VSTM4; FAM170B; TMEM273	Vertex-wise sulcal depth; Vertex-wise cortical thickness; Whole brain restricted directional diffusion (multivariate analysis); Brain shape (segment 7); Heel bone mineral density	The genetic architecture of human cortical folding.; The genetic architecture of human cortical folding.; Multivariate genome-wide association study on tissue-sensitive diffusion metrics highlights pathways that shape the human brain.; Shared heritability of human face and brain shape.; Leveraging Polygenic Functional Enrichment to Improve GWAS Power.	34910505; 34910505; 35505052; 33821002; 30595370	6e-80; 5e-33; 1.0000000000000001e-24; 2e-20; 8e-08
25	10:118676964:A:G	rs4638225	10	118676964	3.6534e-11	118497128	118903080	56	48	1	rs4638225	1	rs4638225	mocov2_T1	TRUE	TRUE	TRUE	ENO4; SHTN1	Vertex-wise sulcal depth; Vertex-wise cortical surface area; Brain morphology (MOSTest); Vertex-wise cortical thickness; Whole brain restricted isotropic diffusion (multivariate analysis)	The genetic architecture of human cortical folding.; The genetic architecture of human cortical folding.; Boosting Schizophrenia Genetics by Utilizing Genetic Overlap With Brain Morphology.; The genetic architecture of human cortical folding.; Multivariate genome-wide association study on tissue-sensitive diffusion metrics highlights pathways that shape the human brain.	34910505; 34910505; 35164939; 34910505; 35505052	6e-113; 2e-58; 4e-36; 5e-34; 4.0000000000000003e-28
26; 24	11:27301437:A:G; 11:27301437:A:G	rs7115024; rs7115024	11	27301437; 27301437	1.42081e-10; 6.57185e-11	27140644	27463713	127; 127	109; 109	1; 1	rs7115024; rs7115024	1; 1	rs7115024; rs7115024	mocov2_T1; mocov2_T2	FALSE	FALSE	FALSE		Heel bone mineral density; Heel bone mineral density; Heel bone mineral density; Heel bone mineral density; Heel bone mineral density; Heel bone mineral density; Heel bone mineral density; Heel bone mineral density; Heel bone mineral density; Heel bone mineral density	Leveraging Polygenic Functional Enrichment to Improve GWAS Power.; Identification of 613 new loci associated with heel bone mineral density and a polygenic risk score for bone mineral density, osteoporosis and fracture.; Identification of 613 new loci associated with heel bone mineral density and a polygenic risk score for bone mineral density, osteoporosis and fracture.; An atlas of genetic infl…	30595370; 30048462; 30048462; 30598549; 30048462; 30595370; 30048462; 30048462; 30598549; 30048462	6e-135; 2e-134; 3e-134; 9.999999999999999e-116; 6e-115; 6e-135; 2e-134; 3e-134; 9.999999999999999e-116; 6e-115
25; 27	11:110956784:A:T; 11:110956784:A:T	rs321414; rs321414	11	110956784; 110956784	2.20877e-11; 1.83141e-12	110820939	111165638	59; 59	54; 54	1; 1	rs321414; rs321414	1; 1	rs321414; rs321414	mocov2_T2; mocov2_T1	FALSE	FALSE	TRUE		Vertex-wise sulcal depth; Vertex-wise cortical thickness; Whole brain restricted isotropic diffusion (multivariate analysis); Whole brain restricted directional diffusion (multivariate analysis); Whole brain free water diffusion (multivariate analysis); Vertex-wise sulcal depth; Vertex-wise cortical thickness; Whole brain restricted isotropic diffusion (multivariate analysis); Whole brain restric…	The genetic architecture of human cortical folding.; The genetic architecture of human cortical folding.; Multivariate genome-wide association study on tissue-sensitive diffusion metrics highlights pathways that shape the human brain.; Multivariate genome-wide association study on tissue-sensitive diffusion metrics highlights pathways that shape the human brain.; Multivariate genome-wide associat…	34910505; 34910505; 35505052; 35505052; 35505052; 34910505; 34910505; 35505052; 35505052; 35505052	2e-121; 1.9999999999999998e-54; 4e-38; 3e-33; 9e-28; 2e-121; 1.9999999999999998e-54; 4e-38; 3e-33; 9e-28
28	11:130282078:C:T	rs2875238	11	130282078	5.64188e-11	130141117	130407079	10	10	1	rs2875238	1	rs2875238	mocov2_T1	FALSE	FALSE	TRUE	ADAMTS8	Pulse pressure; Pulse pressure; Pulse pressure; Pulse pressure; Pulse pressure	A cross-population atlas of genetic associations for 220 human phenotypes.; Genome-wide association analyses using electronic health records identify new loci influencing blood pressure variation.; Trans-ethnic association study of blood pressure determinants in over 750,000 individuals.; High Blood Pressure and Intraocular Pressure: A Mendelian Randomization Study.; Genome-wide association analy…	34594039; 27841878; 30578418; 35762941; 27841878	5e-85; 8e-69; 5e-67; 1.9999999999999999e-63; 5.999999999999999e-62
29; 26	12:28238905:A:G; 12:28238905:A:G	rs61920200; rs61920200	12	28238905; 28238905	4.05618e-13; 1.34584e-12	28095482	28865650	993; 877	830; 733	7; 4	rs61920200;rs7305790;rs7961407;rs1511548;rs10843210;rs11049546;rs1002863; rs61920200;rs12229872;rs6898699;rs4930826	2; 2	rs61920200;rs10843210; rs61920200;rs4930826	mocov2_T1; mocov2_T2	FALSE	FALSE	FALSE	CCDC91; CCDC91	Height; Vertex-wise sulcal depth; Lung function (FVC); Lung function (FVC); Whole brain restricted isotropic diffusion (multivariate analysis); Height; Vertex-wise sulcal depth; Lung function (FVC); Lung function (FVC); Whole brain restricted isotropic diffusion (multivariate analysis)	Leveraging Polygenic Functional Enrichment to Improve GWAS Power.; The genetic architecture of human cortical folding.; Leveraging Polygenic Functional Enrichment to Improve GWAS Power.; New genetic signals for lung function highlight pathways and chronic obstructive pulmonary disease associations across multiple ancestries.; Multivariate genome-wide association study on tissue-sensitive diffusio…	30595370; 34910505; 30595370; 30804560; 35505052; 30595370; 34910505; 30595370; 30804560; 35505052	2.9999999999999998e-114; 2e-93; 5.000000000000001e-66; 1e-58; 2e-44; 2.9999999999999998e-114; 2e-93; 5.000000000000001e-66; 1e-58; 2e-44
27; 30	12:53657467:A:G; 12:53657467:A:G	rs10783562; rs10783562	12	53657467; 53657467	7.96716e-13; 8.3348e-13	53524874	53877205	70; 70	58; 58	1; 1	rs10783562; rs10783562	1; 1	rs10783562; rs10783562	mocov2_T2; mocov2_T1	TRUE	TRUE	TRUE	MFSD5; ESPL1; PFDN5; MYG1; AAAS; SP7; MFSD5; ESPL1; PFDN5; MYG1; AAAS; SP7	Liver enzyme levels (alkaline phosphatase); Serum alkaline phosphatase levels; Serum alkaline phosphatase levels; Lumbar spine bone mineral density; Serum alkaline phosphatase levels; Liver enzyme levels (alkaline phosphatase); Serum alkaline phosphatase levels; Serum alkaline phosphatase levels; Lumbar spine bone mineral density; Serum alkaline phosphatase levels	Genetic analysis in European ancestry individuals identifies 517 loci associated with liver enzymes.; A cross-population atlas of genetic associations for 220 human phenotypes.; Genetics of 35 blood and urine biomarkers in the UK Biobank.; Genome-wide meta-analysis identifies 56 bone mineral density loci and reveals 14 loci associated with risk of fracture.; Genome-wide association study of serum…	33972514; 34594039; 33462484; 22504420; 33547301; 33972514; 34594039; 33462484; 22504420; 33547301	1e-41; 6e-30; 1.9999999999999998e-26; 3e-20; 2e-18; 1e-41; 6e-30; 1.9999999999999998e-26; 3e-20; 2e-18
31; 28	12:65905126:C:T; 12:65905126:C:T	rs79487293; rs79487293	12	65905126; 65905126	3.40414e-13; 9.52235e-11	65780126	66030127	1; 1	1; 1	1; 1	rs79487293; rs79487293	1; 1	rs79487293; rs79487293	mocov2_T1; mocov2_T2	FALSE	FALSE	FALSE		Vertex-wise sulcal depth; Vertex-wise cortical thickness; Whole brain restricted isotropic diffusion (multivariate analysis); Whole brain restricted directional diffusion (multivariate analysis); Whole brain free water diffusion (multivariate analysis); Vertex-wise sulcal depth; Vertex-wise cortical thickness; Whole brain restricted isotropic diffusion (multivariate analysis); Whole brain restric…	The genetic architecture of human cortical folding.; The genetic architecture of human cortical folding.; Multivariate genome-wide association study on tissue-sensitive diffusion metrics highlights pathways that shape the human brain.; Multivariate genome-wide association study on tissue-sensitive diffusion metrics highlights pathways that shape the human brain.; Multivariate genome-wide associat…	34910505; 34910505; 35505052; 35505052; 35505052; 34910505; 34910505; 35505052; 35505052; 35505052	3e-110; 1e-44; 9.999999999999999e-43; 1.0000000000000001e-34; 1.0000000000000001e-28; 3e-110; 1e-44; 9.999999999999999e-43; 1.0000000000000001e-34; 1.0000000000000001e-28
29; 32	12:106476805:C:T; 12:106476805:C:T	rs12146713; rs12146713	12	106476805; 106476805	1.24314e-15; 1.87509e-17	106240661	106635414	3; 153	3; 139	1; 3	rs12146713; rs2248542;rs12146713;rs17038091	1; 2	rs12146713; rs2248542;rs12146713	mocov2_T2; mocov2_T1	FALSE	FALSE	FALSE	NUAK1; NUAK1	Vertex-wise sulcal depth; Whole brain restricted isotropic diffusion (multivariate analysis); Whole brain free water diffusion (multivariate analysis); Whole brain restricted directional diffusion (multivariate analysis); Vertex-wise cortical surface area; Vertex-wise sulcal depth; Whole brain restricted isotropic diffusion (multivariate analysis); Whole brain free water diffusion (multivariate a…	The genetic architecture of human cortical folding.; Multivariate genome-wide association study on tissue-sensitive diffusion metrics highlights pathways that shape the human brain.; Multivariate genome-wide association study on tissue-sensitive diffusion metrics highlights pathways that shape the human brain.; Multivariate genome-wide association study on tissue-sensitive diffusion metrics highl…	34910505; 35505052; 35505052; 35505052; 34910505; 34910505; 35505052; 35505052; 35505052; 34910505	1e-260; 1e-117; 4e-106; 4e-96; 1e-93; 1e-260; 1e-117; 4e-106; 4e-96; 1e-93
33; 30	14:54422399:C:G; 14:54425052:A:C	rs2738265; rs2761887	14	54422399; 54425052	7.87559e-13; 2.88544e-10	54294965	54560055	16; 16	11; 11	1; 1	rs2738265; rs2761887	1; 1	rs2738265; rs2761887	mocov2_T1; mocov2_T2	FALSE	FALSE	TRUE	BMP4; BMP4	Heel bone mineral density; Heel bone mineral density; Spherical equivalent; Whole brain restricted isotropic diffusion (multivariate analysis); Bone stiffness index; Heel bone mineral density; Heel bone mineral density; Spherical equivalent; Whole brain restricted isotropic diffusion (multivariate analysis); Bone stiffness index	Identification of 613 new loci associated with heel bone mineral density and a polygenic risk score for bone mineral density, osteoporosis and fracture.; An atlas of genetic influences on osteoporosis in humans and mice.; Association of Myopia and Intraocular Pressure With Retinal Detachment in European Descent Participants of the UK Biobank Cohort: A Mendelian Randomization Study.; Multivariate …	30048462; 30598549; 32352494; 35505052; 36329257; 30048462; 30598549; 32352494; 35505052; 36329257	1.9999999999999998e-110; 5.0000000000000004e-29; 9.999999999999999e-27; 2e-22; 5e-19; 1.9999999999999998e-110; 5.0000000000000004e-29; 9.999999999999999e-27; 2e-22; 5e-19
34	15:58247977:C:T	rs3742961	15	58247977	2.52712e-11	58076698	58484788	189	167	1	rs3742961	1	rs3742961	mocov2_T1	FALSE	FALSE	FALSE	ALDH1A2	Vertex-wise sulcal depth; Whole brain restricted isotropic diffusion (multivariate analysis); Whole brain free water diffusion (multivariate analysis); Whole brain restricted directional diffusion (multivariate analysis); Vertex-wise cortical surface area	The genetic architecture of human cortical folding.; Multivariate genome-wide association study on tissue-sensitive diffusion metrics highlights pathways that shape the human brain.; Multivariate genome-wide association study on tissue-sensitive diffusion metrics highlights pathways that shape the human brain.; Multivariate genome-wide association study on tissue-sensitive diffusion metrics highl…	34910505; 35505052; 35505052; 35505052; 34910505	1e-65; 3e-60; 6e-43; 1.9999999999999998e-42; 1.9999999999999998e-32
31; 35	16:87225101:A:G; 16:87225101:A:G	rs9937293; rs9937293	16	87225101; 87225101	3.06658e-16; 4.29416e-16	87095694	87387643	83; 77	72; 67	4; 4	rs9937293;rs4240789;rs1108048;rs10863183; rs9937293;rs4240791;rs1108048;rs12919133	1; 1	rs9937293; rs9937293	mocov2_T2; mocov2_T1	FALSE	FALSE	FALSE	C16orf95; C16orf95	Vertex-wise sulcal depth; Vertex-wise cortical thickness; Vertex-wise cortical surface area; Whole brain free water diffusion (multivariate analysis); Whole brain restricted isotropic diffusion (multivariate analysis); Vertex-wise sulcal depth; Vertex-wise cortical thickness; Vertex-wise cortical surface area; Whole brain free water diffusion (multivariate analysis); Whole brain restricted isotro…	The genetic architecture of human cortical folding.; The genetic architecture of human cortical folding.; The genetic architecture of human cortical folding.; Multivariate genome-wide association study on tissue-sensitive diffusion metrics highlights pathways that shape the human brain.; Multivariate genome-wide association study on tissue-sensitive diffusion metrics highlights pathways that shap…	34910505; 34910505; 34910505; 35505052; 35505052; 34910505; 34910505; 34910505; 35505052; 35505052	5e-324; 1e-244; 1.0000000000000001e-159; 1.9999999999999997e-152; 3.999999999999999e-152; 5e-324; 1e-244; 1.0000000000000001e-159; 1.9999999999999997e-152; 3.999999999999999e-152
36	20:38552078:C:T	rs2224538	20	38552078	1.91256e-10	38313771	38694981	20	19	1	rs2224538	1	rs2224538	mocov2_T1	FALSE	TRUE	TRUE		High light scatter reticulocyte percentage of red cells; High light scatter reticulocyte count; Reticulocyte fraction of red cells; Reticulocyte count; Mean corpuscular volume	The Polygenic and Monogenic Basis of Blood Traits and Diseases.; The Polygenic and Monogenic Basis of Blood Traits and Diseases.; The Polygenic and Monogenic Basis of Blood Traits and Diseases.; The Polygenic and Monogenic Basis of Blood Traits and Diseases.; Trans-ethnic and Ancestry-Specific Blood-Cell Genetics in 746,667 Individuals from 5 Global Populations.	32888494; 32888494; 32888494; 32888494; 32888493	1e-41; 1e-37; 2.9999999999999998e-36; 9e-31; 1.0000000000000001e-29
Supp Table 2 New discovered loci from MM-UDIP

## Sheet: Table3-All loci MM-UDIP
GenomicLocus	uniqID	rsID	chr	pos	p	start	end	nSNPs	nGWASSNPs	nIndSigSNPs	IndSigSNPs	nLeadSNPs	LeadSNPs	SOURCE	LeadSNP	symbol	ensg	entrezID	HUGO	pLI	ncRVIS	posMapSNPs	posMapMaxCADD	minGwasP	GWAS_Trait	GWAS_Study	GWAS_PMID	GWAS_P_min	GWAS_OrBeta_top	nearestGene	dist	func	CADD	RDB	posMapFilt	eqtlMapFilt	ciMapFilt	nGWAS_Traits
1	1:22706434:C:T	rs6684375	1	22706434	8.4188e-11	22556214	22836474	38	38	1	rs6684375	1	rs6684375	mocov2_T2	rs6684375										Heel bone mineral density; Heel bone mineral density; Heel bone mineral density; Heel bone mineral density; Femoral neck bone mineral density	Leveraging Polygenic Functional Enrichment to Improve GWAS Power.; An atlas of genetic influences on osteoporosis in humans and mice.; Identification of 613 new loci associated with heel bone mineral density and a polygenic risk score for bone mineral density, osteoporosis and fracture.; Identification of 613 new loci associated with heel bone mineral density and a polygenic risk score for bone m…	30595370; 30598549; 30048462; 30048462; 22504420	6e-147; 1e-139; 1.0000000000000001e-126; 2.0000000000000002e-126; 7e-57	0.06084; 0.0631368; 0.0630582; 0.11	RP11-415K20.1	56609	intergenic	7.593		0.0	0.0	0.0	5
2; 1	1:47974123:C:T; 1:47980916:G:T	rs61784835; rs6658111	1	47974123; 47980916	1.10482e-16; 1.2486e-18	47820825	48118333	4; 14	3; 13	2; 3	rs61784835;rs12143164; rs6658111;rs72688340;rs12118339	1; 1	rs61784835; rs6658111	mocov2_T2; mocov2_T1	rs61784835; rs6658111										Vertex-wise sulcal depth; Whole brain restricted directional diffusion (multivariate analysis); Whole brain restricted isotropic diffusion (multivariate analysis); Vertex-wise cortical thickness; Whole brain free water diffusion (multivariate analysis); Vertex-wise sulcal depth; Whole brain restricted directional diffusion (multivariate analysis); Whole brain restricted isotropic diffusion (multi…	The genetic architecture of human cortical folding.; Multivariate genome-wide association study on tissue-sensitive diffusion metrics highlights pathways that shape the human brain.; Multivariate genome-wide association study on tissue-sensitive diffusion metrics highlights pathways that shape the human brain.; The genetic architecture of human cortical folding.; Multivariate genome-wide associat…	34910505; 35505052; 35505052; 34910505; 35505052; 34910505; 35505052; 35505052; 34910505; 35505052	5e-324; 8e-265; 2.0000000000000003e-237; 4e-229; 2.0000000000000002e-212; 5e-324; 8e-265; 2.0000000000000003e-237; 4e-229; 2.0000000000000002e-212	32.31; 32.31	AL356458.1; AL356458.1	5811; 12604	intergenic; intergenic	15.12; 11.75	4.0; 5.0	0.0; 0.0	0.0; 0.0	0.0; 0.0	10
2; 3	1:215137222:A:C; 1:215139887:A:T	rs6540873; rs1452628	1	215137222; 215139887	1.78949e-13; 2.83802e-12	215009041	215278068	20; 21	19; 20	1; 1	rs6540873; rs1452628	1; 1	rs6540873; rs1452628	mocov2_T1; mocov2_T2	rs6540873; rs1452628										Vertex-wise cortical thickness; Whole brain free water diffusion (multivariate analysis); Whole brain restricted directional diffusion (multivariate analysis); Whole brain restricted isotropic diffusion (multivariate analysis); Vertex-wise sulcal depth; Vertex-wise cortical thickness; Whole brain free water diffusion (multivariate analysis); Whole brain restricted directional diffusion (multivari…	The genetic architecture of human cortical folding.; Multivariate genome-wide association study on tissue-sensitive diffusion metrics highlights pathways that shape the human brain.; Multivariate genome-wide association study on tissue-sensitive diffusion metrics highlights pathways that shape the human brain.; Multivariate genome-wide association study on tissue-sensitive diffusion metrics highl…	34910505; 35505052; 35505052; 35505052; 34910505; 34910505; 35505052; 35505052; 35505052; 34910505	5.9999999999999995e-142; 9e-80; 2e-73; 6e-63; 9e-35; 5.9999999999999995e-142; 9e-80; 2e-73; 6e-63; 9e-35	25.37; 12.3; 25.37; 12.3	RP11-323K10.1; RP11-323K10.1	20338; 23003	intergenic; intergenic	6.348; 8.027	6.0	0.0; 0.0	0.0; 0.0	0.0; 0.0	10
3	2:18711415:C:T	rs4832441	2	18711415	4.87443e-12	18577074	18847425	15	14	1	rs4832441	1	rs4832441	mocov2_T1	rs4832441										Whole brain restricted isotropic diffusion (multivariate analysis); Whole brain restricted directional diffusion (multivariate analysis); Whole brain free water diffusion (multivariate analysis); Vertex-wise cortical thickness; Sex hormone-binding globulin levels adjusted for BMI	Multivariate genome-wide association study on tissue-sensitive diffusion metrics highlights pathways that shape the human brain.; Multivariate genome-wide association study on tissue-sensitive diffusion metrics highlights pathways that shape the human brain.; Multivariate genome-wide association study on tissue-sensitive diffusion metrics highlights pathways that shape the human brain.; The genet…	35505052; 35505052; 35505052; 34910505; 32042192	5e-36; 9e-31; 1e-27; 7e-14; 5e-11	7.49; 0.00526056	RP11-111J6.2	17236	intergenic	1.213	7.0	0.0	0.0	0.0	5
4	2:33764176:A:G	rs13388394	2	33764176	3.3613e-11	33639176	33889177	1	1	1	rs13388394	1	rs13388394	mocov2_T1	rs13388394	RASGRP3	RASGRP3	25780	RASGRP3	0.110282852347241	0.599649585	1.0	17.72	3.3613e-11	wg rh intensity-contrast parahippocampal; White matter microstructure (mode of anisotropy); aseg rh volume Cerebellum-White-Matter; Brain morphology (MOSTest); Subcortical volume (MOSTest)	An expanded set of genome-wide association studies of brain imaging phenotypes in UK Biobank.; Large-scale GWAS reveals genetic architecture of brain white matter microstructure and genetic overlap with cognitive and mental health traits (n = 17,706).; An expanded set of genome-wide association studies of brain imaging phenotypes in UK Biobank.; Boosting Schizophrenia Genetics by Utilizing Geneti…	33875891; 31666681; 33875891; 35164939; 32665545	3e-14; 5e-11; 6e-10; 1e-09; 2e-09	0.184; 0.15	RASGRP3	0	exonic	17.72	7.0	1.0	0.0	0.0	5
5; 4	2:65977031:C:G; 2:65977031:C:G	rs6546176; rs6546176	2	65977031; 65977031	8.35324e-18; 5.07143e-15	65818194	66124624	69; 68	61; 60	2; 2	rs6546176;rs6709906; rs6546176;rs12989218	1; 1	rs6546176; rs6546176	mocov2_T1; mocov2_T2	rs6546176; rs6546176										Vertex-wise sulcal depth; Whole brain restricted directional diffusion (multivariate analysis); Vertex-wise cortical surface area; Brain shape (segment 22); Vertex-wise cortical thickness; Vertex-wise sulcal depth; Whole brain restricted directional diffusion (multivariate analysis); Vertex-wise cortical surface area; Brain shape (segment 22); Vertex-wise cortical thickness	The genetic architecture of human cortical folding.; Multivariate genome-wide association study on tissue-sensitive diffusion metrics highlights pathways that shape the human brain.; The genetic architecture of human cortical folding.; Shared heritability of human face and brain shape.; The genetic architecture of human cortical folding.; The genetic architecture of human cortical folding.; Multi…	34910505; 35505052; 34910505; 33821002; 34910505; 34910505; 35505052; 34910505; 33821002; 34910505	1e-240; 2e-99; 1e-78; 1e-74; 1.0000000000000001e-72; 1e-240; 2e-99; 1e-78; 1e-74; 1.0000000000000001e-72	33.13; 18.79; 18.03; 33.13; 18.79; 18.03	AC074391.1; AC074391.1	0; 0	ncRNA_intronic; ncRNA_intronic	0.909; 0.909	5.0; 5.0	0.0; 0.0	0.0; 0.0	0.0; 0.0	10
6; 5	2:71961307:C:T; 2:71961307:C:T	rs12466122; rs12466122	2	71961307; 71961307	1.78038e-13; 1.43902e-12	71826050	72134918	66; 66	59; 59	2; 2	rs12466122;rs13033431; rs12466122;rs13033431	1; 1	rs12466122; rs12466122	mocov2_T1; mocov2_T2	rs12466122; rs12466122										Whole brain restricted isotropic diffusion (multivariate analysis); Vertex-wise sulcal depth; Height; Whole brain restricted directional diffusion (multivariate analysis); Appendicular lean mass; Whole brain restricted isotropic diffusion (multivariate analysis); Vertex-wise sulcal depth; Height; Whole brain restricted directional diffusion (multivariate analysis); Appendicular lean mass	Multivariate genome-wide association study on tissue-sensitive diffusion metrics highlights pathways that shape the human brain.; The genetic architecture of human cortical folding.; Leveraging Polygenic Functional Enrichment to Improve GWAS Power.; Multivariate genome-wide association study on tissue-sensitive diffusion metrics highlights pathways that shape the human brain.; The genetic archite…	35505052; 34910505; 30595370; 35505052; 33097823; 35505052; 34910505; 30595370; 35505052; 33097823	6e-26; 6e-26; 8e-20; 9e-14; 6e-13; 6e-26; 6e-26; 8e-20; 9e-14; 6e-13	10.53; 0.0141; 10.53; 0.0141	DYSF; DYSF	47408; 47408	intergenic; intergenic	0.134; 0.134	7.0; 7.0	0.0; 0.0	0.0; 0.0	0.0; 0.0	10
6	3:66027343:A:G	rs73833356	3	66027343	8.01482e-14	65902343	66174889	36	32	1	rs73833356	1	rs73833356	mocov2_T2	rs73833356	MAGI1	MAGI1	9223.0	MAGI1	0.999615674506819	-0.022557074	1.0	4.226	8.01482e-14	Vertex-wise sulcal depth; Vertex-wise cortical surface area; Whole brain restricted directional diffusion (multivariate analysis); Whole brain restricted isotropic diffusion (multivariate analysis); Brain shape (segment 1)	The genetic architecture of human cortical folding.; The genetic architecture of human cortical folding.; Multivariate genome-wide association study on tissue-sensitive diffusion metrics highlights pathways that shape the human brain.; Multivariate genome-wide association study on tissue-sensitive diffusion metrics highlights pathways that shape the human brain.; Shared heritability of human face…	34910505; 34910505; 35505052; 35505052; 33821002	6.000000000000001e-107; 3e-41; 5.0000000000000004e-29; 6e-23; 9.000000000000001e-23	21.97; 13.44	MAGI1	2833	intergenic	4.226	5.0	1.0	0.0	0.0	5
7	3:133466374:A:G	rs4428180	3	133466374	9.89488e-11	133308523	133604201	28	27	2	rs4428180;rs8177186	1	rs4428180	mocov2_T2	rs4428180	TF	TF	7018.0	TF	0.0023722656588104	0.299829795	11.0	10.96	9.89488e-11	IDP SWI T2star left putamen; IDP SWI T2star right putamen; Whole brain restricted isotropic diffusion (multivariate analysis); IDP SWI T2star right pallidum; IDP SWI T2star left caudate	An expanded set of genome-wide association studies of brain imaging phenotypes in UK Biobank.; An expanded set of genome-wide association studies of brain imaging phenotypes in UK Biobank.; Multivariate genome-wide association study on tissue-sensitive diffusion metrics highlights pathways that shape the human brain.; An expanded set of genome-wide association studies of brain imaging phenotypes …	33875891; 33875891; 35505052; 33875891; 33875891	2.0000000000000003e-45; 8e-41; 6e-27; 3e-25; 4.0000000000000004e-24	0.198; 0.187; 0.145; 0.142	TFP1:TF	0:0	ncRNA_intronic	1.01	4.0	1.0	0.0	0.0	5
7	3:138696439:C:T	rs9809852	3	138696439	3.43729e-10	138571439	138821440	1	1	1	rs9809852	1	rs9809852	mocov2_T1	rs9809852										Vertex-wise sulcal depth; Vertex-wise cortical thickness; Cortical thickness; Cortical surface area; Vertex-wise cortical surface area	The genetic architecture of human cortical folding.; The genetic architecture of human cortical folding.; Vertex-wise multivariate genome-wide association study identifies 780 unique genetic loci associated with cortical morphology.; Vertex-wise multivariate genome-wide association study identifies 780 unique genetic loci associated with cortical morphology.; The genetic architecture of human cor…	34910505; 34910505; 34560273; 34560273; 34910505	7e-59; 2e-27; 1e-17; 1e-17; 1e-17	16.18; 10.87; 8.55	C3orf72	24145	intergenic	18.64	7.0	0.0	0.0	0.0	5
8	3:147032401:A:G	rs60852193	3	147032401	2.67327e-10	146895326	147201792	34	31	1	rs60852193	1	rs60852193	mocov2_T2	rs60852193										Non-HDL cholesterol levels; Total cholesterol levels; Low density lipoprotein cholesterol levels; Oily fish consumption; Non-HDL cholesterol levels	The power of genetic diversity in genome-wide association studies of lipids.; The power of genetic diversity in genome-wide association studies of lipids.; Phenotypic and Genetic Characterization of Lower LDL-C and Increased Type-2 Diabetes Risk in the UK Biobank.; Genome-wide association study of dietary intake in the UK biobank study and its associations with schizophrenia and other traits.; Th…	34887591; 34887591; 32493714; 32066663; 34887591	4e-10; 4e-09; 1e-08; 2e-08; 2e-08	0.0127604; 0.0158796; 0.0125669	RP11-649A16.1	0	ncRNA_intronic	1.701	5.0	0.0	0.0	0.0	5
8	3:177310993:G:T	rs35614773	3	177310993	5.91875e-12	177148816	177470127	153	119	3	rs35614773;rs4857613;rs7613181	1	rs35614773	mocov2_T1	rs35614773										Vertex-wise cortical thickness; Whole brain restricted isotropic diffusion (multivariate analysis); Brain morphology (MOSTest); Cortical thickness; Central corneal thickness	The genetic architecture of human cortical folding.; Multivariate genome-wide association study on tissue-sensitive diffusion metrics highlights pathways that shape the human brain.; Boosting Schizophrenia Genetics by Utilizing Genetic Overlap With Brain Morphology.; Vertex-wise multivariate genome-wide association study identifies 780 unique genetic loci associated with cortical morphology.; A m…	34910505; 35505052; 35164939; 34560273; 32528159	1.0000000000000001e-49; 2.0000000000000002e-39; 6e-23; 1e-17; 4e-16	14.81; 1.97	LINC00578	0	ncRNA_intronic	0.629	5.0	0.0	0.0	0.0	5
9; 9	3:190640134:A:T; 3:190641068:G:T	rs4308324; rs58531798	3	190640134; 190641068	4.02188e-13; 4.72269e-14	190467836	190803744	169; 183	120; 131	1; 1	rs4308324; rs58531798	1; 1	rs4308324; rs58531798	mocov2_T1; mocov2_T2	rs4308324; rs58531798	GMNC; GMNC	GMNC; GMNC	647309; 647309.0	GMNC; GMNC		1.10405959; 1.10405959	19.0; 28.0	12.4; 12.4	9.05408e-09; 6.57697e-09	Vertex-wise sulcal depth; Brain morphology (MOSTest); Vertex-wise cortical thickness; Brain morphology (MOSTest); Vertex-wise cortical surface area; Vertex-wise sulcal depth; Brain morphology (MOSTest); Vertex-wise cortical thickness; Brain morphology (MOSTest); Vertex-wise cortical surface area	The genetic architecture of human cortical folding.; Boosting Schizophrenia Genetics by Utilizing Genetic Overlap With Brain Morphology.; The genetic architecture of human cortical folding.; Understanding the genetic determinants of the brain with MOSTest.; The genetic architecture of human cortical folding.; The genetic architecture of human cortical folding.; Boosting Schizophrenia Genetics by …	34910505; 35164939; 34910505; 32665545; 34910505; 34910505; 35164939; 34910505; 32665545; 34910505	9.999999999999999e-129; 9.000000000000001e-105; 1e-77; 1.0000000000000001e-72; 1e-71; 9.999999999999999e-129; 9.000000000000001e-105; 1e-77; 1.0000000000000001e-72; 1e-71	24.13; 18.66; 17.9; 24.13; 18.66; 17.9	GMNC; GMNC	29915; 30849	intergenic; intergenic	3.265; 2.779	7.0; 7.0	0.0; 0.0	0.0; 0.0	0.0; 0.0	10
10; 10	4:103188709:C:T; 4:103198082:A:G	rs13107325; rs13135092	4	103188709; 103198082	8.82769e-17; 1.30637e-14	102577364	103512162	30; 25	30; 25	4; 2	rs13107325;rs34333163;rs34592089;rs6855246; rs13135092;rs34333163	1; 1	rs13107325; rs13135092	mocov2_T1; mocov2_T2	rs13107325; rs13135092	BANK1; SLC39A8; BANK1; SLC39A8	BANK1; SLC39A8; BANK1; SLC39A8	55024; 64116; 55024.0; 64116.0	BANK1; SLC39A8; BANK1; SLC39A8	0.4457837395106335; 0.4457837395106335	-0.254000016; -0.254000016	16.0; 11.0	23.1; 23.1	8.82769e-17; 1.30637e-14	High density lipoprotein cholesterol levels; Vertex-wise cortical thickness; Brain morphology (MOSTest); Liver fibrosis and steatohepatitis severity (MRI cT1 measure); Whole brain restricted isotropic diffusion (multivariate analysis); High density lipoprotein cholesterol levels; Vertex-wise cortical thickness; Brain morphology (MOSTest); Liver fibrosis and steatohepatitis severity (MRI cT1 measu…	The power of genetic diversity in genome-wide association studies of lipids.; The genetic architecture of human cortical folding.; Boosting Schizophrenia Genetics by Utilizing Genetic Overlap With Brain Morphology.; Genome-wide and Mendelian randomisation studies of liver MRI yield insights into the pathogenesis of steatohepatitis.; Multivariate genome-wide association study on tissue-sensitive d…	34887591; 34910505; 35164939; 32247823; 35505052; 34887591; 34910505; 35164939; 32247823; 35505052	1e-185; 6e-175; 6e-169; 1e-133; 6.000000000000001e-125; 1e-185; 6e-175; 6e-169; 1e-133; 6.000000000000001e-125	28.2; 0.544; 28.2; 0.544	SLC39A8; SLC39A8	0; 0	exonic; intronic	23.1; 10.31	5.0; 6.0	1.0; 1.0	0.0; 0.0	0.0; 0.0	10
11	5:171128464:C:T	rs6555969	5	171128464	1.30846e-12	171002549	171291686	12	7	1	rs6555969	1	rs6555969	mocov2_T1	rs6555969										Vertex-wise sulcal depth; Whole brain restricted isotropic diffusion (multivariate analysis); Vertex-wise cortical surface area; Whole brain restricted directional diffusion (multivariate analysis); Brain shape (segment 1)	The genetic architecture of human cortical folding.; Multivariate genome-wide association study on tissue-sensitive diffusion metrics highlights pathways that shape the human brain.; The genetic architecture of human cortical folding.; Multivariate genome-wide association study on tissue-sensitive diffusion metrics highlights pathways that shape the human brain.; Shared heritability of human face…	34910505; 35505052; 34910505; 35505052; 33821002	1e-96; 7.999999999999999e-32; 1e-27; 9.999999999999999e-26; 1e-18	20.85; 10.9	AC011410.1	69069	intergenic	18.21	5.0	0.0	0.0	0.0	5
11	6:25804921:A:T	rs78833965	6	25804921	5.30613e-12	25491453	26248503	14	14	2	rs78833965;rs1800562	1	rs78833965	mocov2_T2	rs78833965	LRRC16A; SLC17A1; SLC17A3; SLC17A2; HFE; HIST1H4C; HIST1H1T; HIST1H2BC; HIST1H2AC	CARMIL1; SLC17A1; SLC17A3; SLC17A2; HFE; H4C3; H1-6; H2BC4; H2AC6	55604.0; 6568.0; 10786.0; 10246.0; 3077.0; 554313.0; 3010.0; 8347.0; 8334.0	LRRC16A; SLC17A1; SLC17A3; SLC17A2; HFE; HIST1H4C; HIST1H1T; HIST1H2BC; HIST1H2AC	0.1386414586908977	0.2126088146666666	16.0	25.2	5.30613e-12	Mean corpuscular volume; Mean corpuscular hemoglobin; Mean corpuscular volume; Mean corpuscular hemoglobin concentration; Mean corpuscular volume	The Polygenic and Monogenic Basis of Blood Traits and Diseases.; The Allelic Landscape of Human Blood Cell Trait Variation and Links to Common Complex Disease.; The Allelic Landscape of Human Blood Cell Trait Variation and Links to Common Complex Disease.; Trans-ethnic and Ancestry-Specific Blood-Cell Genetics in 746,667 Individuals from 5 Global Populations.; A cross-population atlas of genetic …	32888494; 27863252; 27863252; 32888493; 34594039	0.0; 0.0; 0.0; 0.0; 0.0	0.281596; 0.3222512; 0.2611127; 0.18368; 0.2566	SLC17A1	0	intronic	8.093	7.0	1.0	0.0	0.0	5
12	6:29352297:A:C	rs238871	6	29352297	1.32185e-10	29102117	29479810	77	69	1	rs238871	1	rs238871	mocov2_T2	rs238871	OR14J1; OR5V1; OR12D3; OR12D2	OR14J1; OR5V1; OR12D3; OR12D2	442191.0; 81696.0; 81797.0; 26529.0	OR14J1; OR5V1; OR12D3; OR12D2	0.1511223095269477	0.750122686	113.0	13.66	1.32185e-10	Platelet-to-lymphocyte ratio; Waist circumference adjusted for body mass index; Insomnia; Platelet-to-lymphocyte ratio	Genetic determinants of blood-cell traits influence susceptibility to childhood acute lymphoblastic leukemia.; GWAS of allometric body-shape indices in UK Biobank identifies loci suggesting associations with morphogenesis, organogenesis, adrenal cell renewal and cancer.; Genome-wide meta-analysis of insomnia prioritizes genes associated with metabolic and psychiatric pathways.; Genetic determinan…	34469753; 34021172; 35835914; 34469753	5e-24; 2e-10; 9e-09; 5e-08	0.0197089; 0.005	OR5V1	0	intronic	0.634	6.0	1.0	0.0	0.0	4
12; 13	6:126751921:C:T; 6:126851160:C:T	rs9401881; rs1490384	6	126751921; 126851160	5.05279e-11; 5.03317e-14	126532472	127205701	252; 255	205; 208	1; 2	rs9401881; rs1490384;rs58321169	1; 1	rs9401881; rs1490384	mocov2_T1; mocov2_T2	rs9401881; rs1490384	CENPW; CENPW	CENPW; CENPW	387103; 387103.0	CENPW; CENPW	0.50013630684411; 0.50013630684411	-0.442381075; -0.442381075	17.0; 15.0	10.05; 10.05	9.57936e-11; 1.5799e-11	Height; Vertex-wise sulcal depth; Appendicular lean mass; Height; Vertex-wise cortical thickness; Height; Vertex-wise sulcal depth; Appendicular lean mass; Height; Vertex-wise cortical surface area	Leveraging Polygenic Functional Enrichment to Improve GWAS Power.; The genetic architecture of human cortical folding.; The genetic architecture of appendicular lean mass characterized by association analysis in the UK Biobank study.; A cross-population atlas of genetic associations for 220 human phenotypes.; The genetic architecture of human cortical folding.; Leveraging Polygenic Functional Enr…	30595370; 34910505; 33097823; 34594039; 34910505; 30595370; 34910505; 33097823; 34594039; 34910505	3e-166; 8e-161; 9.999999999999999e-131; 2e-103; 9.999999999999999e-92; 3e-166; 8e-161; 9.999999999999999e-131; 2e-103; 3e-102	27.02; 0.0462; 0.0356; 20.31; 27.02; 0.0462; 0.0356; 21.47	MIR588; MIR588	53855; 45300	intergenic; intergenic	13.44; 18.6	7.0; 7.0	0.0; 0.0	0.0; 0.0	0.0; 0.0	10
13; 14	6:151021722:A:G; 6:151021722:A:G	rs12206172; rs12206172	6	151021722; 151021722	3.20153e-12; 2.28546e-11	150890996	151166353	44; 26	39; 22	2; 1	rs12206172;rs2279629; rs12206172	1; 1	rs12206172; rs12206172	mocov2_T1; mocov2_T2	rs12206172; rs12206172	PLEKHG1; PLEKHG1	PLEKHG1; PLEKHG1	57480; 57480.0	PLEKHG1; PLEKHG1	0.0001786774083035; 0.0001786774083035	1.445662511; 1.445662511	44.0; 26.0	17.23; 17.23	3.20153e-12; 2.28546e-11	Whole brain restricted isotropic diffusion (multivariate analysis); Whole brain free water diffusion (multivariate analysis); White matter hyperintensities; Vertex-wise cortical thickness; White matter hyperintensity volume; Whole brain restricted isotropic diffusion (multivariate analysis); Whole brain free water diffusion (multivariate analysis); White matter hyperintensities; Vertex-wise corti…	Multivariate genome-wide association study on tissue-sensitive diffusion metrics highlights pathways that shape the human brain.; Multivariate genome-wide association study on tissue-sensitive diffusion metrics highlights pathways that shape the human brain.; Genome-wide association study of MRI markers of cerebral small vessel disease in 42,310 participants.; The genetic architecture of human co…	35505052; 35505052; 32358547; 34910505; 33293549; 35505052; 35505052; 32358547; 34910505; 33293549	1.0000000000000001e-23; 3e-18; 9e-17; 2e-16; 7e-15; 1.0000000000000001e-23; 3e-18; 9e-17; 2e-16; 7e-15	7.807; 8.25; 0.0448; 7.807; 8.25; 0.0448	PLEKHG1; PLEKHG1	0; 0	intronic; intronic	4.875; 4.875	7.0; 7.0	1.0; 1.0	0.0; 0.0	0.0; 0.0	10
14; 15	6:151857594:A:G; 6:151872448:G:T	rs6931664; rs9479068	6	151857594; 151872448	6.17876e-13; 6.3873e-12	151722381	152037704	98; 98	87; 87	3; 3	rs6931664;rs66775662;rs4870045; rs9479068;rs66775662;rs4870045	1; 1	rs6931664; rs9479068	mocov2_T1; mocov2_T2	rs6931664; rs9479068	CCDC170; CCDC170	CCDC170; CCDC170	80129; 80129.0	CCDC170; CCDC170	1.02112361613873e-19; 1.02112361613873e-19	1.380677467; 1.380677467	98.0; 98.0	16.75; 16.75	6.17876e-13; 6.3873e-12	Heel bone mineral density; Heel bone mineral density; Heel bone mineral density; Heel bone mineral density; Heel bone mineral density; Heel bone mineral density; Heel bone mineral density; Heel bone mineral density; Heel bone mineral density; Heel bone mineral density	Identification of 613 new loci associated with heel bone mineral density and a polygenic risk score for bone mineral density, osteoporosis and fracture.; Leveraging Polygenic Functional Enrichment to Improve GWAS Power.; Identification of 613 new loci associated with heel bone mineral density and a polygenic risk score for bone mineral density, osteoporosis and fracture.; Identification of 613 ne…	30048462; 30595370; 30048462; 30048462; 30048462; 30048462; 30595370; 30048462; 30048462; 30048462	0.0; 1e-300; 1e-300; 1e-300; 5.0000000000000005e-255; 0.0; 1e-300; 1e-300; 1e-300; 5.0000000000000005e-255	0.0883992; 0.0882182; 0.105936; 0.0883992; 0.0882182; 0.105936	CCDC170; CCDC170	0; 0	intronic; intronic	3.742; 6.997	5.0	1.0; 1.0	0.0; 0.0	0.0; 0.0	10
15; 16	7:2863574:A:G; 7:2863574:A:G	rs2107964; rs2107964	7	2863574; 2863574	3.0693e-18; 3.53786e-21	2627152	3037929	222; 230	180; 186	3; 5	rs2107964;rs1713913;rs798512; rs2107964;rs1713913;rs1183079;rs798512;rs7790322	1; 1	rs2107964; rs2107964	mocov2_T1; mocov2_T2	rs2107964; rs2107964	AMZ1; GNA12; AMZ1; GNA12	AMZ1; GNA12; AMZ1; GNA12	155185; 2768; 155185.0; 2768.0	AMZ1; GNA12; AMZ1; GNA12	0.4541349910779825; 0.4541349910779825	2.216605784; 2.216605784	284.0; 291.0	13.96; 13.96	3.0693e-18; 3.53786e-21	Height; Height; Height; Appendicular lean mass; Height; Height; Height; Height; Appendicular lean mass; Height	Leveraging Polygenic Functional Enrichment to Improve GWAS Power.; A cross-population atlas of genetic associations for 220 human phenotypes.; Defining the role of common variation in the genomic and biological architecture of adult human height.; The genetic architecture of appendicular lean mass characterized by association analysis in the UK Biobank study.; Characterizing rare and low-frequenc…	30595370; 34594039; 25282103; 33097823; 31562340; 30595370; 34594039; 25282103; 33097823; 31562340	2e-241; 1e-168; 2e-71; 3e-68; 2.9999999999999998e-55; 2e-241; 1e-168; 2e-71; 3e-68; 2.9999999999999998e-55	0.0391; 0.057; 0.0359; 0.051120285; 0.0391; 0.057; 0.0359; 0.051120285	GNA12; GNA12	0; 0	intronic; intronic	0.846; 0.846	6.0; 6.0	1.0; 1.0	0.0; 0.0	0.0; 0.0	10
16; 17	7:19611753:C:T; 7:19611753:C:T	rs10807794; rs10807794	7	19611753; 19611753	1.27035e-15; 1.17071e-17	19423842	19779202	307; 280	265; 246	4; 2	rs10807794;rs6461447;rs12668640;rs4719563; rs10807794;rs6461447	1; 1	rs10807794; rs10807794	mocov2_T1; mocov2_T2	rs10807794; rs10807794										Vertex-wise sulcal depth; Whole brain restricted directional diffusion (multivariate analysis); Whole brain restricted isotropic diffusion (multivariate analysis); Vertex-wise cortical thickness; Whole brain free water diffusion (multivariate analysis); Vertex-wise sulcal depth; Whole brain restricted directional diffusion (multivariate analysis); Whole brain restricted isotropic diffusion (multi…	The genetic architecture of human cortical folding.; Multivariate genome-wide association study on tissue-sensitive diffusion metrics highlights pathways that shape the human brain.; Multivariate genome-wide association study on tissue-sensitive diffusion metrics highlights pathways that shape the human brain.; The genetic architecture of human cortical folding.; Multivariate genome-wide associat…	34910505; 35505052; 35505052; 34910505; 35505052; 34910505; 35505052; 35505052; 34910505; 35505052	3e-267; 2e-98; 4e-89; 6e-82; 1e-65; 3e-267; 2e-98; 4e-89; 6e-82; 1e-65	34.93; 19.18; 34.93; 19.18	AC007091.1; AC007091.1	0; 0	ncRNA_intronic; ncRNA_intronic	0.154; 0.154	5.0; 5.0	0.0; 0.0	0.0; 0.0	0.0; 0.0	10
17	7:33204682:C:T	rs62449325	7	33204682	7.7689e-12	33041801	33469750	43	36	1	rs62449325	1	rs62449325	mocov2_T1	rs62449325	BBS9	BBS9	27241	BBS9	6.37524189346244e-10	0.196307887	43.0	16.5	7.7689e-12	Vertex-wise sulcal depth; Vertex-wise cortical surface area; Whole brain restricted directional diffusion (multivariate analysis); Sagittal craniosynostosis; Whole brain restricted isotropic diffusion (multivariate analysis)	The genetic architecture of human cortical folding.; The genetic architecture of human cortical folding.; Multivariate genome-wide association study on tissue-sensitive diffusion metrics highlights pathways that shape the human brain.; A genome-wide association study identifies susceptibility loci for nonsyndromic sagittal craniosynostosis near BMP2 and within BBS9.; Multivariate genome-wide asso…	34910505; 34910505; 35505052; 23160099; 35505052	1e-107; 6e-35; 3e-23; 6e-20; 9e-18	22.05; 12.33; 4.17	BBS9	0	intronic	1.578	6.0	1.0	0.0	0.0	5
18	7:96210219:C:T	rs201650162	7	96210219	2.35289e-12	96025233	96379520	141	114	1	rs201650162	1	rs201650162	mocov2_T1	rs201650162	SHFM1	SEM1	7979	SHFM1	0.418592332178749	-0.181498149	141.0	19.47	2.35289e-12	Vertex-wise sulcal depth; Vertex-wise cortical surface area; Vertex-wise cortical thickness; Whole brain restricted directional diffusion (multivariate analysis); Facial morphology (segment 54)	The genetic architecture of human cortical folding.; The genetic architecture of human cortical folding.; The genetic architecture of human cortical folding.; Multivariate genome-wide association study on tissue-sensitive diffusion metrics highlights pathways that shape the human brain.; Insights into the genetic architecture of the human face.	34910505; 34910505; 34910505; 35505052; 33288918	5e-324; 6e-153; 4e-93; 3e-82; 8e-74	26.35; 20.47	SHFM1	0	intergenic	0.647	6.0	1.0	0.0	0.0	5
19; 18	7:120974765:A:G; 7:120974765:A:G	rs3801387; rs3801387	7	120974765; 120974765	1.12328e-46; 1.53088e-60	120578161	121165783	205; 250	176; 213	15; 18	rs79162867;rs76042375;rs2140648;rs798906;rs10233441;rs17509082;rs2707520;rs2707518;rs12668590;rs17284876;rs13247600;rs12706326;rs9769381;rs3801387;rs2908004; rs4731007;rs798906;rs10233441;rs17509082;rs2707520;rs2707518;rs17356657;rs17284876;rs798908;rs76042375;rs2110279;rs79162867;rs13247600;rs9769381;rs3801387;rs1541509;rs2536189;rs2952565	5; 6	rs79162867;rs2140648;rs13247600;rs9769381;rs3801387; rs4731007;rs798908;rs13247600;rs9769381;rs3801387;rs2952565	mocov2_T1; mocov2_T2	rs79162867; rs4731007	CPED1; WNT16; FAM3C; CPED1; WNT16; FAM3C	CPED1; WNT16; FAM3C; CPED1; WNT16; FAM3C	79974; 51384; 10447; 79974.0; 51384.0; 10447.0	CPED1; WNT16; FAM3C; CPED1; WNT16; FAM3C	0.0004220777688709; 0.0004220777688709	-0.7898043156666666; -0.7898043156666666	201.0; 246.0	21.0; 23.4	1.12328e-46; 1.53088e-60	Heel bone mineral density; Heel bone mineral density; Heel bone mineral density; Heel bone mineral density; Heel bone mineral density; Heel bone mineral density; Heel bone mineral density; Heel bone mineral density; Heel bone mineral density; Heel bone mineral density	Identification of 613 new loci associated with heel bone mineral density and a polygenic risk score for bone mineral density, osteoporosis and fracture.; Identification of 153 new loci associated with heel bone mineral density and functional involvement of GPC6 in osteoporosis.; Identification of 613 new loci associated with heel bone mineral density and a polygenic risk score for bone mineral de…	30048462; 28869591; 30048462; 30595370; 31453325; 30048462; 28869591; 30048462; 30595370; 31453325	0.0; 5e-324; 1e-300; 1e-300; 1e-300; 0.0; 5e-324; 1e-300; 1e-300; 1e-300	0.17; 0.179756; 0.17; 0.179756	CPED1; CPED1	0; 0	intronic; intronic	5.961; 0.187	4.0; 6.0	1.0; 1.0	0.0; 0.0	0.0; 0.0	10
20; 19	7:151498679:C:T; 7:151498679:C:T	rs4128399; rs4128399	7	151498679; 151498679	4.84702e-12; 2.69633e-13	151367906	151629499	8; 8	7; 7	2; 2	rs4128399;rs13224758; rs4128399;rs12703159	1; 1	rs4128399; rs4128399	mocov2_T1; mocov2_T2	rs4128399; rs4128399	PRKAG2; PRKAG2	PRKAG2; PRKAG2	51422; 51422.0	PRKAG2; PRKAG2	0.977557428638321; 0.977557428638321	1.331830924; 1.331830924	8.0; 8.0	8.138; 8.138	4.84702e-12; 2.69633e-13	Whole brain restricted isotropic diffusion (multivariate analysis); Whole brain free water diffusion (multivariate analysis); Whole brain restricted directional diffusion (multivariate analysis); Vertex-wise sulcal depth; Vertex-wise cortical thickness; Whole brain restricted isotropic diffusion (multivariate analysis); Whole brain free water diffusion (multivariate analysis); Whole brain restric…	Multivariate genome-wide association study on tissue-sensitive diffusion metrics highlights pathways that shape the human brain.; Multivariate genome-wide association study on tissue-sensitive diffusion metrics highlights pathways that shape the human brain.; Multivariate genome-wide association study on tissue-sensitive diffusion metrics highlights pathways that shape the human brain.; The genet…	35505052; 35505052; 35505052; 34910505; 34910505; 35505052; 35505052; 35505052; 34910505; 34910505	2e-69; 2e-59; 1e-41; 1e-35; 4e-31; 2e-69; 2e-59; 1e-41; 1e-35; 4e-31	12.48; 11.6; 12.48; 11.6	PRKAG2; PRKAG2	0; 0	intronic; intronic	0.584; 0.584	7.0; 7.0	1.0; 1.0	0.0; 0.0	0.0; 0.0	10
20	8:9090902:A:G	rs330060	8	9090902	1.90872e-10	7963230	9274747	177	156	2	rs330060;rs876954	1	rs330060	mocov2_T2	rs330060	SGK223; MFHAS1; RP11-10A14.4	ENSG00000182319; MFHAS1; ENSG00000253426	157285.0; 9258.0	MFHAS1	1.1141002289192176e-05	0.9551839	11.0	5.894	1.33837e-08	Heel bone mineral density; Heel bone mineral density; Heel bone mineral density; Heel bone mineral density; Liver enzyme levels (alkaline phosphatase)	Identification of 613 new loci associated with heel bone mineral density and a polygenic risk score for bone mineral density, osteoporosis and fracture.; An atlas of genetic influences on osteoporosis in humans and mice.; Identification of 613 new loci associated with heel bone mineral density and a polygenic risk score for bone mineral density, osteoporosis and fracture.; Identification of 613 n…	30048462; 30598549; 30048462; 30048462; 33972514	2.0000000000000002e-126; 1e-90; 4.0000000000000004e-82; 8.000000000000001e-82; 1.0000000000000001e-66	0.0487802; 0.0395283; 0.0401012; 0.0394276; 0.00402452	RP11-10A14.8	0	ncRNA_exonic	4.971	7.0	0.0	0.0	0.0	5
21	8:74265667:A:G	rs28591268	8	74265667	5.54226e-11	74137063	74393827	9	7	1	rs28591268	1	rs28591268	mocov2_T1	rs28591268															RP11-434I12.2	0	ncRNA_intronic	0.17	7.0	0.0	0.0	0.0	0
22; 21	8:119952750:A:C; 8:119952750:A:C	rs6469788; rs6469788	8	119952750; 119952750	2.91261e-13; 2.30804e-14	119761923	120188543	154; 158	128; 132	2; 3	rs6469788;rs1485302; rs6469788;rs1385499;rs1485302	1; 1	rs6469788; rs6469788	mocov2_T1; mocov2_T2	rs6469788; rs6469788	TNFRSF11B; COLEC10; TNFRSF11B; COLEC10	TNFRSF11B; COLEC10; TNFRSF11B; COLEC10	4982; 10584; 4982.0; 10584.0	TNFRSF11B; COLEC10; TNFRSF11B; COLEC10	0.185383087500096; 0.185383087500096	-0.044626199; -0.044626199	137.0; 137.0	20.6; 20.6	2.91261e-13; 2.30804e-14	Liver enzyme levels (alkaline phosphatase); Serum alkaline phosphatase levels; Serum alkaline phosphatase levels; Lumbar spine bone mineral density; Total body bone mineral density; Liver enzyme levels (alkaline phosphatase); Serum alkaline phosphatase levels; Serum alkaline phosphatase levels; Lumbar spine bone mineral density; Total body bone mineral density	Genetic analysis in European ancestry individuals identifies 517 loci associated with liver enzymes.; A cross-population atlas of genetic associations for 220 human phenotypes.; Genome-wide association study of serum liver enzymes implicates diverse metabolic and liver pathology.; Genome-wide meta-analysis identifies 56 bone mineral density loci and reveals 14 loci associated with risk of fractur…	33972514; 34594039; 33547301; 22504420; 29304378; 33972514; 34594039; 33547301; 22504420; 29304378	3.9999999999999997e-128; 6e-113; 9.999999999999999e-85; 3e-39; 4.999999999999999e-32; 3.9999999999999997e-128; 6e-113; 9.999999999999999e-85; 3e-39; 4.999999999999999e-32	0.00543394; 0.0463; 19.5; 0.08; 0.074; 0.00543394; 0.0463; 19.5; 0.08; 0.074	TNFRSF11B; TNFRSF11B	0; 0	intronic; intronic	2.068; 2.068	7.0; 7.0	1.0; 1.0	0.0; 0.0	0.0; 0.0	10
23; 22	9:113665419:A:G; 9:113665419:A:G	rs1409682; rs1409682	9	113665419; 113665419	7.15575e-13; 1.06096e-11	113523136	113909558	101; 105	84; 88	3; 3	rs1409682;rs10817124;rs10817103; rs1409682;rs10817124;rs10980625	1; 1	rs1409682; rs1409682	mocov2_T1; mocov2_T2	rs1409682; rs1409682	LPAR1; LPAR1	LPAR1; LPAR1	1902; 1902.0	LPAR1; LPAR1	0.0014189810556421; 0.0014189810556421	0.680565103; 0.680565103	101.0; 105.0	16.43; 16.43	7.15575e-13; 1.06096e-11	Whole brain free water diffusion (multivariate analysis); Vertex-wise cortical thickness; Vertex-wise sulcal depth; Whole brain restricted isotropic diffusion (multivariate analysis); Central corneal thickness; Whole brain free water diffusion (multivariate analysis); Vertex-wise cortical thickness; Vertex-wise sulcal depth; Whole brain restricted isotropic diffusion (multivariate analysis); Cent…	Multivariate genome-wide association study on tissue-sensitive diffusion metrics highlights pathways that shape the human brain.; The genetic architecture of human cortical folding.; The genetic architecture of human cortical folding.; Multivariate genome-wide association study on tissue-sensitive diffusion metrics highlights pathways that shape the human brain.; A multiethnic genome-wide analysi…	35505052; 34910505; 34910505; 35505052; 32528159; 35505052; 34910505; 34910505; 35505052; 32528159	9e-47; 3e-32; 1.0000000000000001e-23; 1e-22; 3e-21; 9e-47; 3e-32; 1.0000000000000001e-23; 1e-22; 3e-21	11.82; 10.04; 2.7; 11.82; 10.04; 2.7	LPAR1; LPAR1	0; 0	intronic; intronic	3.386; 3.386		1.0; 1.0	0.0; 0.0	0.0; 0.0	10
23	9:114063446:C:T	rs4978988	9	114063446	1.08477e-10	113922460	114188447	3	3	1	rs4978988	1	rs4978988	mocov2_T2	rs4978988										White matter hyperintensity volume; White matter hyperintensity volume	Cerebral small vessel disease genomics and its implications across the lifespan.; Cerebral small vessel disease genomics and its implications across the lifespan.	33293549; 33293549	2e-06; 4e-06	0.0657; 0.0657	RP11-202G18.1	16329	intergenic	3.606	7.0	0.0	0.0	0.0	2
24	10:50290482:A:G	rs34289781	10	50290482	1.87901e-13	50128187	50497348	103	91	1	rs34289781	1	rs34289781	mocov2_T1	rs34289781	VSTM4; FAM170B; C10orf128	VSTM4; FAM170B; TMEM273	196740; 170370; 170371	VSTM4; FAM170B; C10orf128	0.1002640520196455	0.6942655950000001	103.0	15.06	1.87901e-13	Vertex-wise sulcal depth; Vertex-wise cortical thickness; Whole brain restricted directional diffusion (multivariate analysis); Brain shape (segment 7); Heel bone mineral density	The genetic architecture of human cortical folding.; The genetic architecture of human cortical folding.; Multivariate genome-wide association study on tissue-sensitive diffusion metrics highlights pathways that shape the human brain.; Shared heritability of human face and brain shape.; Leveraging Polygenic Functional Enrichment to Improve GWAS Power.	34910505; 34910505; 35505052; 33821002; 30595370	6e-80; 5e-33; 1.0000000000000001e-24; 2e-20; 8e-08	18.93; 11.97	VSTM4	0	intronic	2.25	7.0	1.0	0.0	0.0	5
25	10:118676964:A:G	rs4638225	10	118676964	3.6534e-11	118497128	118903080	56	48	1	rs4638225	1	rs4638225	mocov2_T1	rs4638225	ENO4; KIAA1598	ENO4; SHTN1	387712; 57698	ENO4; KIAA1598	0.886314076883697	-1.172818277	73.0	14.78	3.6534e-11	Vertex-wise sulcal depth; Vertex-wise cortical surface area; Brain morphology (MOSTest); Vertex-wise cortical thickness; Whole brain restricted isotropic diffusion (multivariate analysis)	The genetic architecture of human cortical folding.; The genetic architecture of human cortical folding.; Boosting Schizophrenia Genetics by Utilizing Genetic Overlap With Brain Morphology.; The genetic architecture of human cortical folding.; Multivariate genome-wide association study on tissue-sensitive diffusion metrics highlights pathways that shape the human brain.	34910505; 34910505; 35164939; 34910505; 35505052	6e-113; 2e-58; 4e-36; 5e-34; 4.0000000000000003e-28	22.59; 16.13; 12.15	KIAA1598	0	intronic	0.578	7.0	1.0	0.0	0.0	5
26; 24	11:27301437:A:G; 11:27301437:A:G	rs7115024; rs7115024	11	27301437; 27301437	1.42081e-10; 6.57185e-11	27140644	27463713	127; 127	109; 109	1; 1	rs7115024; rs7115024	1; 1	rs7115024; rs7115024	mocov2_T1; mocov2_T2	rs7115024; rs7115024										Heel bone mineral density; Heel bone mineral density; Heel bone mineral density; Heel bone mineral density; Heel bone mineral density; Heel bone mineral density; Heel bone mineral density; Heel bone mineral density; Heel bone mineral density; Heel bone mineral density	Leveraging Polygenic Functional Enrichment to Improve GWAS Power.; Identification of 613 new loci associated with heel bone mineral density and a polygenic risk score for bone mineral density, osteoporosis and fracture.; Identification of 613 new loci associated with heel bone mineral density and a polygenic risk score for bone mineral density, osteoporosis and fracture.; An atlas of genetic infl…	30595370; 30048462; 30048462; 30598549; 30048462; 30595370; 30048462; 30048462; 30598549; 30048462	6e-135; 2e-134; 3e-134; 9.999999999999999e-116; 6e-115; 6e-135; 2e-134; 3e-134; 9.999999999999999e-116; 6e-115	0.0503959; 0.0504377; 0.0463012; 0.0512088; 0.0503959; 0.0504377; 0.0463012; 0.0512088	CCDC34; CCDC34	50936; 50936	intergenic; intergenic	2.462; 2.462	7.0; 7.0	0.0; 0.0	0.0; 0.0	0.0; 0.0	10
27; 25	11:110956784:A:T; 11:110956784:A:T	rs321414; rs321414	11	110956784; 110956784	1.83141e-12; 2.20877e-11	110820939	111165638	59; 59	54; 54	1; 1	rs321414; rs321414	1; 1	rs321414; rs321414	mocov2_T1; mocov2_T2	rs321414; rs321414										Vertex-wise sulcal depth; Vertex-wise cortical thickness; Whole brain restricted isotropic diffusion (multivariate analysis); Whole brain restricted directional diffusion (multivariate analysis); Whole brain free water diffusion (multivariate analysis); Vertex-wise sulcal depth; Vertex-wise cortical thickness; Whole brain restricted isotropic diffusion (multivariate analysis); Whole brain restric…	The genetic architecture of human cortical folding.; The genetic architecture of human cortical folding.; Multivariate genome-wide association study on tissue-sensitive diffusion metrics highlights pathways that shape the human brain.; Multivariate genome-wide association study on tissue-sensitive diffusion metrics highlights pathways that shape the human brain.; Multivariate genome-wide associat…	34910505; 34910505; 35505052; 35505052; 35505052; 34910505; 34910505; 35505052; 35505052; 35505052	2e-121; 1.9999999999999998e-54; 4e-38; 3e-33; 9e-28; 2e-121; 1.9999999999999998e-54; 4e-38; 3e-33; 9e-28	23.44; 15.53; 23.44; 15.53	RP11-89C3.3; RP11-89C3.3	3809; 3809	intergenic; intergenic	3.327; 3.327	5.0; 5.0	0.0; 0.0	0.0; 0.0	0.0; 0.0	10
28	11:130282078:C:T	rs2875238	11	130282078	5.64188e-11	130141117	130407079	10	10	1	rs2875238	1	rs2875238	mocov2_T1	rs2875238	ADAMTS8	ADAMTS8	11095	ADAMTS8	1.0556522196896e-08	-0.530041347	10.0	16.91	5.64188e-11	Pulse pressure; Pulse pressure; Pulse pressure; Pulse pressure; Pulse pressure	A cross-population atlas of genetic associations for 220 human phenotypes.; Genome-wide association analyses using electronic health records identify new loci influencing blood pressure variation.; Trans-ethnic association study of blood pressure determinants in over 750,000 individuals.; High Blood Pressure and Intraocular Pressure: A Mendelian Randomization Study.; Genome-wide association analy…	34594039; 27841878; 30578418; 35762941; 27841878	5e-85; 8e-69; 5e-67; 1.9999999999999999e-63; 5.999999999999999e-62	0.0408; 0.478; 0.4622; 0.4386; 0.443	ADAMTS8	0	intronic	3.343	5.0	1.0	0.0	0.0	5
29; 26	12:28238905:A:G; 12:28238905:A:G	rs61920200; rs61920200	12	28238905; 28238905	4.05618e-13; 1.34584e-12	28095482	28865650	993; 877	830; 733	7; 4	rs61920200;rs7305790;rs7961407;rs1511548;rs10843210;rs11049546;rs1002863; rs61920200;rs12229872;rs6898699;rs4930826	2; 2	rs61920200;rs10843210; rs61920200;rs4930826	mocov2_T1; mocov2_T2	rs61920200; rs61920200	CCDC91; CCDC91	CCDC91; CCDC91	55297; 55297.0	CCDC91; CCDC91	3.15157303302004e-05; 3.15157303302004e-05	0.458621643; 0.458621643	941.0; 812.0	19.67; 19.67	8.5004e-12; 2.12633e-11	Height; Vertex-wise sulcal depth; Lung function (FVC); Lung function (FVC); Whole brain restricted isotropic diffusion (multivariate analysis); Height; Vertex-wise sulcal depth; Lung function (FVC); Lung function (FVC); Whole brain restricted isotropic diffusion (multivariate analysis)	Leveraging Polygenic Functional Enrichment to Improve GWAS Power.; The genetic architecture of human cortical folding.; Leveraging Polygenic Functional Enrichment to Improve GWAS Power.; New genetic signals for lung function highlight pathways and chronic obstructive pulmonary disease associations across multiple ancestries.; Multivariate genome-wide association study on tissue-sensitive diffusio…	30595370; 34910505; 30595370; 30804560; 35505052; 30595370; 34910505; 30595370; 30804560; 35505052	2.9999999999999998e-114; 2e-93; 5.000000000000001e-66; 1e-58; 2e-44; 2.9999999999999998e-114; 2e-93; 5.000000000000001e-66; 1e-58; 2e-44	20.5; 0.0379; 20.5; 0.0379	CCDC91; CCDC91	47276; 47276	intergenic; intergenic	3.21; 3.21	7.0; 7.0	0.0; 0.0	0.0; 0.0	0.0; 0.0	10
30; 27	12:53657467:A:G; 12:53657467:A:G	rs10783562; rs10783562	12	53657467; 53657467	8.3348e-13; 7.96716e-13	53524874	53877205	70; 70	58; 58	1; 1	rs10783562; rs10783562	1; 1	rs10783562; rs10783562	mocov2_T1; mocov2_T2	rs10783562; rs10783562	MFSD5; ESPL1; PFDN5; C12orf10; AAAS; SP7; MFSD5; ESPL1; PFDN5; C12orf10; AAAS; SP7	MFSD5; ESPL1; PFDN5; MYG1; AAAS; SP7; MFSD5; ESPL1; PFDN5; MYG1; AAAS; SP7	84975; 9700; 5204; 60314; 8086; 121340; 84975.0; 9700.0; 5204.0; 60314.0; 8086.0; 121340.0	MFSD5; ESPL1; PFDN5; C12orf10; AAAS; SP7; MFSD5; ESPL1; PFDN5; C12orf10; AAAS; SP7	0.3014995795073187; 0.3014995795073187	-0.1335908585; -0.1335908585	93.0; 93.0	23.7; 23.7	8.3348e-13; 7.96716e-13	Liver enzyme levels (alkaline phosphatase); Serum alkaline phosphatase levels; Serum alkaline phosphatase levels; Lumbar spine bone mineral density; Serum alkaline phosphatase levels; Liver enzyme levels (alkaline phosphatase); Serum alkaline phosphatase levels; Serum alkaline phosphatase levels; Lumbar spine bone mineral density; Serum alkaline phosphatase levels	Genetic analysis in European ancestry individuals identifies 517 loci associated with liver enzymes.; A cross-population atlas of genetic associations for 220 human phenotypes.; Genetics of 35 blood and urine biomarkers in the UK Biobank.; Genome-wide meta-analysis identifies 56 bone mineral density loci and reveals 14 loci associated with risk of fracture.; Genome-wide association study of serum…	33972514; 34594039; 33462484; 22504420; 33547301; 33972514; 34594039; 33462484; 22504420; 33547301	1e-41; 6e-30; 1.9999999999999998e-26; 3e-20; 2e-18; 1e-41; 6e-30; 1.9999999999999998e-26; 3e-20; 2e-18	0.00327436; 0.0281; 0.0279; 0.05; 8.78; 0.00327436; 0.0281; 0.0279; 0.05; 8.78	ESPL1; ESPL1	4615; 4615	intergenic; intergenic	0.014; 0.014	7.0; 7.0	1.0; 1.0	0.0; 0.0	0.0; 0.0	10
31; 28	12:65905126:C:T; 12:65905126:C:T	rs79487293; rs79487293	12	65905126; 65905126	3.40414e-13; 9.52235e-11	65780126	66030127	1; 1	1; 1	1; 1	rs79487293; rs79487293	1; 1	rs79487293; rs79487293	mocov2_T1; mocov2_T2	rs79487293; rs79487293										Vertex-wise sulcal depth; Vertex-wise cortical thickness; Whole brain restricted isotropic diffusion (multivariate analysis); Whole brain restricted directional diffusion (multivariate analysis); Whole brain free water diffusion (multivariate analysis); Vertex-wise sulcal depth; Vertex-wise cortical thickness; Whole brain restricted isotropic diffusion (multivariate analysis); Whole brain restric…	The genetic architecture of human cortical folding.; The genetic architecture of human cortical folding.; Multivariate genome-wide association study on tissue-sensitive diffusion metrics highlights pathways that shape the human brain.; Multivariate genome-wide association study on tissue-sensitive diffusion metrics highlights pathways that shape the human brain.; Multivariate genome-wide associat…	34910505; 34910505; 35505052; 35505052; 35505052; 34910505; 34910505; 35505052; 35505052; 35505052	3e-110; 1e-44; 9.999999999999999e-43; 1.0000000000000001e-34; 1.0000000000000001e-28; 3e-110; 1e-44; 9.999999999999999e-43; 1.0000000000000001e-34; 1.0000000000000001e-28	22.31; 14.0; 22.31; 14.0	RP11-230G5.2; RP11-230G5.2	0; 0	ncRNA_intronic; ncRNA_intronic	17.35; 17.35	4.0; 4.0	0.0; 0.0	0.0; 0.0	0.0; 0.0	10
32; 29	12:106476805:C:T; 12:106476805:C:T	rs12146713; rs12146713	12	106476805; 106476805	1.87509e-17; 1.24314e-15	106240661	106635414	153; 3	139; 3	3; 1	rs2248542;rs12146713;rs17038091; rs12146713	2; 1	rs2248542;rs12146713; rs12146713	mocov2_T1; mocov2_T2	rs2248542; rs12146713	NUAK1; NUAK1	NUAK1; NUAK1	9891; 9891.0	NUAK1; NUAK1	0.189029672518911; 0.189029672518911	0.541314246; 0.541314246	18.0; 3.0	19.59; 19.59	1.87509e-17; 1.24314e-15	Vertex-wise sulcal depth; Whole brain restricted isotropic diffusion (multivariate analysis); Whole brain free water diffusion (multivariate analysis); Whole brain restricted directional diffusion (multivariate analysis); Vertex-wise cortical surface area; Vertex-wise sulcal depth; Whole brain restricted isotropic diffusion (multivariate analysis); Whole brain free water diffusion (multivariate a…	The genetic architecture of human cortical folding.; Multivariate genome-wide association study on tissue-sensitive diffusion metrics highlights pathways that shape the human brain.; Multivariate genome-wide association study on tissue-sensitive diffusion metrics highlights pathways that shape the human brain.; Multivariate genome-wide association study on tissue-sensitive diffusion metrics highl…	34910505; 35505052; 35505052; 35505052; 34910505; 34910505; 35505052; 35505052; 35505052; 34910505	1e-260; 1e-117; 4e-106; 4e-96; 1e-93; 1e-260; 1e-117; 4e-106; 4e-96; 1e-93	34.48; 20.53; 34.48; 20.53	ST13P3; NUAK1	40436; 0	intergenic; intronic	2.204; 19.59	5.0; 5.0	0.0; 1.0	0.0; 0.0	0.0; 0.0	10
33; 30	14:54422399:C:G; 14:54425052:A:C	rs2738265; rs2761887	14	54422399; 54425052	7.87559e-13; 2.88544e-10	54294965	54560055	16; 16	11; 11	1; 1	rs2738265; rs2761887	1; 1	rs2738265; rs2761887	mocov2_T1; mocov2_T2	rs2738265; rs2761887	BMP4; BMP4	BMP4; BMP4	652; 652.0	BMP4; BMP4	0.967466005226941; 0.967466005226941	-0.512221976; -0.512221976	16.0; 16.0	16.33; 16.33	7.87559e-13; 2.88544e-10	Heel bone mineral density; Heel bone mineral density; Spherical equivalent; Whole brain restricted isotropic diffusion (multivariate analysis); Bone stiffness index; Heel bone mineral density; Heel bone mineral density; Spherical equivalent; Whole brain restricted isotropic diffusion (multivariate analysis); Bone stiffness index	Identification of 613 new loci associated with heel bone mineral density and a polygenic risk score for bone mineral density, osteoporosis and fracture.; An atlas of genetic influences on osteoporosis in humans and mice.; Association of Myopia and Intraocular Pressure With Retinal Detachment in European Descent Participants of the UK Biobank Cohort: A Mendelian Randomization Study.; Multivariate …	30048462; 30598549; 32352494; 35505052; 36329257; 30048462; 30598549; 32352494; 35505052; 36329257	1.9999999999999998e-110; 5.0000000000000004e-29; 9.999999999999999e-27; 2e-22; 5e-19; 1.9999999999999998e-110; 5.0000000000000004e-29; 9.999999999999999e-27; 2e-22; 5e-19	0.0476138; 0.0280415; 0.12; 0.719337; 0.0476138; 0.0280415; 0.12; 0.719337	BMP4; BMP4	0; 0	intronic; intronic	8.101; 2.442	4.0	1.0; 1.0	0.0; 0.0	0.0; 0.0	10
34	15:58247977:C:T	rs3742961	15	58247977	2.52712e-11	58076698	58484788	189	167	1	rs3742961	1	rs3742961	mocov2_T1	rs3742961	ALDH1A2	ALDH1A2	101928635	ALDH1A2	0.516630055977224	1.671453522	178.0	19.71	2.52712e-11	Vertex-wise sulcal depth; Whole brain restricted isotropic diffusion (multivariate analysis); Whole brain free water diffusion (multivariate analysis); Whole brain restricted directional diffusion (multivariate analysis); Vertex-wise cortical surface area	The genetic architecture of human cortical folding.; Multivariate genome-wide association study on tissue-sensitive diffusion metrics highlights pathways that shape the human brain.; Multivariate genome-wide association study on tissue-sensitive diffusion metrics highlights pathways that shape the human brain.; Multivariate genome-wide association study on tissue-sensitive diffusion metrics highl…	34910505; 35505052; 35505052; 35505052; 34910505	1e-65; 3e-60; 6e-43; 1.9999999999999998e-42; 1.9999999999999998e-32	17.12; 11.87	ALDH1A2	0	intronic	0.431		1.0	0.0	0.0	5
35; 31	16:87225101:A:G; 16:87225101:A:G	rs9937293; rs9937293	16	87225101; 87225101	4.29416e-16; 3.06658e-16	87095694	87387643	77; 83	67; 72	4; 4	rs9937293;rs4240791;rs1108048;rs12919133; rs9937293;rs4240789;rs1108048;rs10863183	1; 1	rs9937293; rs9937293	mocov2_T1; mocov2_T2	rs9937293; rs9937293	C16orf95; C16orf95	C16orf95; C16orf95	100506581; 100506581.0	C16orf95; C16orf95		0.915813928; 0.915813928	77.0; 83.0	16.49; 16.49	4.29416e-16; 3.06658e-16	Vertex-wise sulcal depth; Vertex-wise cortical thickness; Vertex-wise cortical surface area; Whole brain free water diffusion (multivariate analysis); Whole brain restricted isotropic diffusion (multivariate analysis); Vertex-wise sulcal depth; Vertex-wise cortical thickness; Vertex-wise cortical surface area; Whole brain free water diffusion (multivariate analysis); Whole brain restricted isotro…	The genetic architecture of human cortical folding.; The genetic architecture of human cortical folding.; The genetic architecture of human cortical folding.; Multivariate genome-wide association study on tissue-sensitive diffusion metrics highlights pathways that shape the human brain.; Multivariate genome-wide association study on tissue-sensitive diffusion metrics highlights pathways that shap…	34910505; 34910505; 34910505; 35505052; 35505052; 34910505; 34910505; 34910505; 35505052; 35505052	5e-324; 1e-244; 1.0000000000000001e-159; 1.9999999999999997e-152; 3.999999999999999e-152; 5e-324; 1e-244; 1.0000000000000001e-159; 1.9999999999999997e-152; 3.999999999999999e-152	33.41; 26.92; 33.41; 26.92	C16orf95; C16orf95	0; 0	intergenic; intergenic	1.793; 1.793	7.0; 7.0	1.0; 1.0	0.0; 0.0	0.0; 0.0	10
36	20:38552078:C:T	rs2224538	20	38552078	1.91256e-10	38313771	38694981	20	19	1	rs2224538	1	rs2224538	mocov2_T1	rs2224538										High light scatter reticulocyte percentage of red cells; High light scatter reticulocyte count; Reticulocyte fraction of red cells; Reticulocyte count; Mean corpuscular volume	The Polygenic and Monogenic Basis of Blood Traits and Diseases.; The Polygenic and Monogenic Basis of Blood Traits and Diseases.; The Polygenic and Monogenic Basis of Blood Traits and Diseases.; The Polygenic and Monogenic Basis of Blood Traits and Diseases.; Trans-ethnic and Ancestry-Specific Blood-Cell Genetics in 746,667 Individuals from 5 Global Populations.	32888494; 32888494; 32888494; 32888494; 32888493	1e-41; 1e-37; 2.9999999999999998e-36; 9e-31; 1.0000000000000001e-29	0.030603474; 0.029050723; 0.02860158; 0.026235113	HSPE1P1	9485	intergenic	16.96	6.0	0.0	0.0	0.0	5
Supp Table 3 All discovered loci from MM-UDIP

## Sheet: Table4-Overlap of SM-UDIP loci
GenomicLocus	uniqID	rsID	chr	pos	p	start	end	nSNPs	nGWASSNPs	nIndSigSNPs	IndSigSNPs	nLeadSNPs	LeadSNPs	SOURCE	LeadSNP	symbol	ensg	entrezID	HUGO	pLI	ncRVIS	posMapSNPs	posMapMaxCADD	minGwasP	GWAS_Trait	GWAS_Study	GWAS_PMID	GWAS_P_min	GWAS_OrBeta_top	nearestGene	dist	func	CADD	RDB	posMapFilt	eqtlMapFilt	ciMapFilt
1; 1	1:47980916:G:T; 1:47980916:G:T	rs6658111; rs6658111	1	47980916; 47980916	1.94056e-27; 1.3701399999999998e-20	47870564	47993332	117; 75	106; 66	8; 7	rs6658111;rs72688340;rs12118339;rs6681140;rs7552140;rs11211538;rs6668106;rs515146; rs6658111;rs72688340;rs12118339;rs524158;rs11211538;rs56034078;rs515146	1; 1	rs6658111; rs6658111	vit_T1; vit_T2	rs6658111; rs6658111	FOXE3; FOXD2; FOXE3; FOXD2	ENSG00000186790; ENSG00000186564; ENSG00000186790; ENSG00000186564	2301.0; 2306.0; 2301; 2306	FOXE3; FOXD2; FOXE3; FOXD2		-0.4660067805; -0.4660067805	38.0; 25.0	15.62; 15.51	2.16513e-10; 1.0971e-09	Vertex-wise sulcal depth; Whole brain restricted directional diffusion (multivariate analysis); Whole brain restricted isotropic diffusion (multivariate analysis); Vertex-wise cortical thickness; Whole brain free water diffusion (multivariate analysis); Vertex-wise sulcal depth; Whole brain restricted directional diffusion (multivariate analysis); Whole brain restricted isotropic diffusion (multi…	The genetic architecture of human cortical folding.; Multivariate genome-wide association study on tissue-sensitive diffusion metrics highlights pathways that shape the human brain.; The genetic architecture of human cortical folding.; Multivariate genome-wide association study on tissue-sensitive diffusion metrics highlights pathways that shape the human brain.	34910505; 35505052; 34910505; 35505052	5e-324; 5e-324		AL356458.1; AL356458.1	12604; 12604	intergenic; intergenic	11.75; 11.75	5.0; 5.0	0.0; 0.0	0.0; 0.0	0.0; 0.0
8; 2	2:65970775:C:T; 2:65991546:C:T	rs2287282; rs2193469	2	65970775; 65991546	4.17551e-12; 3.45756e-16	65945432	65999623	30; 79	27; 70	1; 3	rs2287282; rs2193469;rs10203155;rs1549022	1; 1	rs2287282; rs2193469	vit_T1; vit_T2	rs2287282; rs2193469										Vertex-wise sulcal depth; Whole brain restricted directional diffusion (multivariate analysis); Vertex-wise cortical surface area; Brain shape (segment 22); Vertex-wise cortical thickness; Vertex-wise sulcal depth; Whole brain restricted directional diffusion (multivariate analysis); Vertex-wise cortical surface area; Brain shape (segment 22); Vertex-wise cortical thickness	The genetic architecture of human cortical folding.; Multivariate genome-wide association study on tissue-sensitive diffusion metrics highlights pathways that shape the human brain.; Shared heritability of human face and brain shape.; The genetic architecture of human cortical folding.; Multivariate genome-wide association study on tissue-sensitive diffusion metrics highlights pathways that shape…	34910505; 35505052; 33821002; 34910505; 35505052; 33821002	1e-240; 1e-240	33.13; 18.79; 33.13; 18.79	AC074391.1; AC074391.1	0; 0	ncRNA_intronic; ncRNA_intronic	1.017; 1.472	6.0; 5.0	0.0; 0.0	0.0; 0.0	0.0; 0.0
3; 9	2:71954468:A:G; 2:71956043:A:G	rs6760396; rs12475748	2	71954468; 71956043	6.33957e-14; 2.98563e-17	71951050	72009917	66; 97	59; 83	2; 3	rs6760396;rs13033431; rs12475748;rs1427687;rs4638819	1; 1	rs6760396; rs12475748	vit_T2; vit_T1	rs6760396; rs12475748										Whole brain restricted isotropic diffusion (multivariate analysis); Vertex-wise sulcal depth; Height; Whole brain restricted directional diffusion (multivariate analysis); Appendicular lean mass; Whole brain restricted isotropic diffusion (multivariate analysis); Vertex-wise sulcal depth; Height; Whole brain restricted directional diffusion (multivariate analysis); Appendicular lean mass	Multivariate genome-wide association study on tissue-sensitive diffusion metrics highlights pathways that shape the human brain.; The genetic architecture of human cortical folding.; Leveraging Polygenic Functional Enrichment to Improve GWAS Power.; The genetic architecture of appendicular lean mass characterized by association analysis in the UK Biobank study.; Multivariate genome-wide associati…	35505052; 34910505; 30595370; 33097823; 35505052; 34910505; 30595370; 33097823	6e-26; 6e-26	10.53; 10.53	DYSF; DYSF	40569; 42144	intergenic; intergenic	9.022; 7.039	5.0; 7.0	0.0; 0.0	0.0; 0.0	0.0; 0.0
4; 15	3:177322867:C:T; 3:177323573:A:G	rs6766914; rs9873662	3	177322867; 177323573	1.42561e-12; 1.59975e-16	177271932	177342468	125; 123	95; 93	3; 3	rs6766914;rs6769466;rs552757; rs9873662;rs2133593;rs552757	1; 1	rs6766914; rs9873662	vit_T2; vit_T1	rs6766914; rs9873662										Vertex-wise sulcal depth; Vertex-wise cortical surface area; Vertex-wise cortical thickness; Whole brain restricted isotropic diffusion (multivariate analysis); Whole brain restricted directional diffusion (multivariate analysis); Vertex-wise sulcal depth; Vertex-wise cortical surface area; Vertex-wise cortical thickness; Whole brain restricted isotropic diffusion (multivariate analysis); Whole b…	The genetic architecture of human cortical folding.; Multivariate genome-wide association study on tissue-sensitive diffusion metrics highlights pathways that shape the human brain.; The genetic architecture of human cortical folding.; Multivariate genome-wide association study on tissue-sensitive diffusion metrics highlights pathways that shape the human brain.	34910505; 35505052; 34910505; 35505052	4e-123; 4e-123	23.6; 16.8; 14.81; 23.6; 16.8; 14.81	LINC00578; LINC00578	0; 0	ncRNA_intronic; ncRNA_intronic	0.712; 0.841	7.0; 6.0	0.0; 0.0	0.0; 0.0	0.0; 0.0
16; 5	3:190640121:G:T; 3:190641068:G:T	rs4624605; rs58531798	3	190640121; 190641068	2.7835800000000003e-23; 2.26265e-19	190591418	190678743	244; 255	183; 193	3; 2	rs4624605;rs113591830;rs12488471; rs58531798;rs13060312	2; 2	rs4624605;rs113591830; rs58531798;rs13060312	vit_T1; vit_T2	rs4624605; rs58531798	GMNC; GMNC	ENSG00000205835; ENSG00000205835	647309.0; 647309	GMNC; GMNC		1.10405959; 1.10405959	49.0; 58.0	12.4; 12.4	7.32463e-17; 2.68179e-14	Vertex-wise sulcal depth; Brain morphology (MOSTest); Vertex-wise cortical thickness; Vertex-wise cortical surface area; Vertex-wise sulcal depth; Brain morphology (MOSTest); Vertex-wise cortical thickness; Vertex-wise cortical surface area	The genetic architecture of human cortical folding.; Boosting Schizophrenia Genetics by Utilizing Genetic Overlap With Brain Morphology.; Understanding the genetic determinants of the brain with MOSTest.; The genetic architecture of human cortical folding.; Boosting Schizophrenia Genetics by Utilizing Genetic Overlap With Brain Morphology.; Understanding the genetic determinants of the brain with…	34910505; 35164939; 32665545; 34910505; 35164939; 32665545	9.999999999999999e-129; 9.999999999999999e-129	24.13; 18.66; 24.13; 18.66	GMNC; GMNC	29902; 30849	intergenic; intergenic	1.575; 2.779	7.0; 7.0	0.0; 0.0	0.0; 0.0	0.0; 0.0
21; 8	5:122653399:A:G; 5:122705737:A:C	rs13156484; rs6893539	5	122653399; 122705737	2.33331e-10; 1.90469e-11	122652493	122797234	113; 252	89; 206	1; 3	rs13156484; rs6893539;rs890928;rs890928	1; 1	rs13156484; rs6893539	vit_T1; vit_T2	rs13156484; rs6893539	CEP120; CEP120	ENSG00000168944; ENSG00000168944	153241.0; 153241	CEP120; CEP120	4.3447069250691596e-11; 4.3447069250691596e-11	-0.528864642; -0.528864642	107.0; 227.0	22.7; 22.7	3.50834e-10; 1.90469e-11	Educational attainment; Height; Diastolic blood pressure; Appendicular lean mass; Whole brain restricted directional diffusion (multivariate analysis); Educational attainment; Height; Whole brain free water diffusion (multivariate analysis); Whole brain restricted isotropic diffusion (multivariate analysis)	Polygenic prediction of educational attainment within and between families from genome-wide association analyses in 3 million individuals.; Leveraging Polygenic Functional Enrichment to Improve GWAS Power.; High Blood Pressure and Intraocular Pressure: A Mendelian Randomization Study.; Genome-wide Associations Reveal Human-Mouse Genetic Convergence and Modifiers of Myogenesis, CPNE1 and STC2.; Mu…	35361970; 30595370; 35762941; 31761296; 35505052; 35361970; 30595370; 35505052	9e-73; 9e-73	0.0569996; 0.1895; 0.0569996; 0.0524749	CEP120; CEP120	27179; 0	intergenic; intronic	0.855; 3.445	7.0; 7.0	0.0; 1.0	0.0; 0.0	0.0; 0.0
9; 22	5:171096729:C:G; 5:171128464:C:T	rs26341; rs6555969	5	171096729; 171128464	3.33665e-12; 1.66271e-10	171096729	171166685	5; 12	5; 7	1; 1	rs26341; rs6555969	1; 1	rs26341; rs6555969	vit_T2; vit_T1	rs26341; rs6555969										Brain shape (segment 151); Vertex-wise sulcal depth; Whole brain restricted isotropic diffusion (multivariate analysis); Vertex-wise cortical surface area; Whole brain restricted directional diffusion (multivariate analysis); Brain shape (segment 1)	Shared heritability of human face and brain shape.; The genetic architecture of human cortical folding.; Multivariate genome-wide association study on tissue-sensitive diffusion metrics highlights pathways that shape the human brain.; Shared heritability of human face and brain shape.	33821002; 34910505; 35505052; 33821002	6e-14; 1e-96	20.85; 10.9	AC011410.1; AC011410.1	100804; 69069	intergenic; intergenic	0.515; 18.21	5.0; 5.0	0.0; 0.0	0.0; 0.0	0.0; 0.0
24; 10	6:39526867:A:G; 6:39526895:C:T	rs1520; rs6458117	6	39526867; 39526895	7.09685e-14; 6.50892e-19	39464712	39633751	69; 78	64; 68	2; 3	rs1520;rs13208338; rs6458117;rs9471130;rs2466406	1; 1	rs1520; rs6458117	vit_T1; vit_T2	rs1520; rs6458117	KIF6; KIF6	ENSG00000164627; ENSG00000164627	221458.0; 221458	KIF6; KIF6	1.03952440427845e-16; 1.03952440427845e-16	5.668753748; 5.668753748	69.0; 78.0	21.3; 21.3	7.09685e-14; 6.50892e-19	Vertex-wise sulcal depth; Whole brain restricted directional diffusion (multivariate analysis); Whole brain restricted isotropic diffusion (multivariate analysis); Vertex-wise cortical thickness; Vertex-wise cortical surface area; Vertex-wise sulcal depth; Whole brain restricted directional diffusion (multivariate analysis); Whole brain restricted isotropic diffusion (multivariate analysis); Vert…	The genetic architecture of human cortical folding.; Multivariate genome-wide association study on tissue-sensitive diffusion metrics highlights pathways that shape the human brain.; The genetic architecture of human cortical folding.; Multivariate genome-wide association study on tissue-sensitive diffusion metrics highlights pathways that shape the human brain.	34910505; 35505052; 34910505; 35505052	3e-116; 3e-116	22.92; 22.92	KIF6; KIF6	0; 0	intronic; intronic	21.3; 18.38	5.0; 6.0	1.0; 1.0	0.0; 0.0	0.0; 0.0
11; 25	6:44814892:A:G; 6:44961999:A:C	rs16869119; rs9885796	6	44814892; 44961999	1.3202e-11; 2.65413e-13	44683838	45404170	583; 209	499; 177	4; 3	rs16869119;rs191485704;rs34455867;rs73441184; rs9885796;rs77971312;rs73444688	3; 1	rs16869119;rs34455867;rs73441184; rs9885796	vit_T2; vit_T1	rs16869119; rs9885796	SUPT3H; RUNX2; SUPT3H; RUNX2	ENSG00000196284; ENSG00000124813; ENSG00000196284; ENSG00000124813	8464; 860; 8464.0; 860.0	SUPT3H; RUNX2; SUPT3H; RUNX2	0.4980344063136648; 0.4980344063136648	-0.7436555755; -0.7436555755	546.0; 220.0	19.96; 19.14	1.3202e-11; 2.65413e-13	Heel bone mineral density; Serum phosphate levels; Whole brain restricted directional diffusion (multivariate analysis); Heel bone mineral density; Height	Leveraging Polygenic Functional Enrichment to Improve GWAS Power.; Identification of 613 new loci associated with heel bone mineral density and a polygenic risk score for bone mineral density, osteoporosis and fracture.; An atlas of genetic influences on osteoporosis in humans and mice.; Genetics of 35 blood and urine biomarkers in the UK Biobank.; Multivariate genome-wide association study on ti…	30595370; 30048462; 30598549; 33462484; 35505052; 30595370; 30048462; 30598549; 34594039	4e-126; 4e-126	0.107672; 0.0910186; 0.107672; 0.0910186	SUPT3H; SUPT3H	0; 0	intronic; intronic	2.878; 7.378	6.0; 5.0	1.0; 1.0	0.0; 0.0	0.0; 0.0
12; 26	6:126755055:A:G; 6:126819699:G:T	rs9401882; rs4418209	6	126755055; 126819699	2.97008e-22; 4.2825e-15	126657472	127080700	320; 256	269; 209	5; 2	rs9401882;rs11759026;rs1337736;rs9718230;rs9401877; rs4418209;rs853974	1; 1	rs9401882; rs4418209	vit_T2; vit_T1	rs9401882; rs4418209	CENPW; CENPW	ENSG00000203760; ENSG00000203760	387103; 387103.0	CENPW; CENPW	0.50013630684411; 0.50013630684411	-0.442381075; -0.442381075	23.0; 17.0	10.05; 10.05	8.8371e-22; 2.03528e-14	Height; Vertex-wise sulcal depth; Appendicular lean mass; Vertex-wise cortical surface area; Height; Vertex-wise sulcal depth; Appendicular lean mass; Vertex-wise cortical surface area	Leveraging Polygenic Functional Enrichment to Improve GWAS Power.; The genetic architecture of human cortical folding.; The genetic architecture of appendicular lean mass characterized by association analysis in the UK Biobank study.; A cross-population atlas of genetic associations for 220 human phenotypes.; Leveraging Polygenic Functional Enrichment to Improve GWAS Power.; The genetic architect…	30595370; 34910505; 33097823; 34594039; 30595370; 34910505; 33097823; 34594039	3e-166; 3e-166	27.02; 0.0462; 27.02; 0.0462	MIR588; MIR588	50721; 13839	intergenic; intergenic	7.96; 3.827	6.0; 7.0	0.0; 0.0	0.0; 0.0	0.0; 0.0
30; 13	7:2762126:C:T; 7:2819727:A:T	rs798546; rs7784066	7	2762126; 2819727	4.27984e-19; 1.33226e-16	2752152	2912928	228; 222	186; 180	5; 3	rs798546;rs798531;rs7790322;rs1639064;rs1183079; rs7784066;rs1713913;rs798512	1; 1	rs798546; rs7784066	vit_T1; vit_T2	rs798546; rs7784066	AMZ1; GNA12; AMZ1; GNA12	ENSG00000174945; ENSG00000146535; ENSG00000174945; ENSG00000146535	155185.0; 2768.0; 155185; 2768	AMZ1; GNA12; AMZ1; GNA12	0.4541349910779825; 0.4541349910779825	2.216605784; 2.216605784	290.0; 284.0	13.96; 13.96	4.27984e-19; 1.33226e-16	Height; Appendicular lean mass; Height; Appendicular lean mass	Leveraging Polygenic Functional Enrichment to Improve GWAS Power.; A cross-population atlas of genetic associations for 220 human phenotypes.; Defining the role of common variation in the genomic and biological architecture of adult human height.; The genetic architecture of appendicular lean mass characterized by association analysis in the UK Biobank study.; Characterizing rare and low-frequenc…	30595370; 34594039; 25282103; 33097823; 31562340; 30595370; 34594039; 25282103; 33097823; 31562340	2e-241; 2e-241	0.0391; 0.057; 0.0391; 0.057	AMZ1; GNA12	0; 0	intergenic; intronic	2.189; 0.259	6.0	1.0; 1.0	0.0; 0.0	0.0; 0.0
14; 31	7:19609643:A:G; 7:19613954:A:G	rs11767221; rs4472417	7	19609643; 19613954	2.7063e-33; 2.48744e-25	19548842	19654476	374; 357	324; 307	7; 6	rs6944632;rs4719563;rs9639333;rs2892936;rs11767221;rs2390151;rs6946520; rs4472417;rs2892936;rs4570042;rs4719563;rs6972245;rs13238033	3; 1	rs6944632;rs11767221;rs6946520; rs4472417	vit_T2; vit_T1	rs6944632; rs4472417	TWISTNB; TMEM196	ENSG00000105849; ENSG00000173452	221830; 256130	TWISTNB; TMEM196	0.1547197011314489	1.239250233	12.0	5.846	3.58628e-11	Vertex-wise sulcal depth; Whole brain restricted directional diffusion (multivariate analysis); Whole brain restricted isotropic diffusion (multivariate analysis); Vertex-wise cortical thickness; Whole brain free water diffusion (multivariate analysis); Vertex-wise sulcal depth; Whole brain restricted directional diffusion (multivariate analysis); Whole brain restricted isotropic diffusion (multi…	The genetic architecture of human cortical folding.; Multivariate genome-wide association study on tissue-sensitive diffusion metrics highlights pathways that shape the human brain.; The genetic architecture of human cortical folding.; Multivariate genome-wide association study on tissue-sensitive diffusion metrics highlights pathways that shape the human brain.	34910505; 35505052; 34910505; 35505052	3e-267; 3e-267	34.93; 34.93	AC007091.1; AC007091.1	0; 0	ncRNA_intronic; ncRNA_intronic	12.78; 7.35	4.0; 5.0	0.0; 0.0	0.0; 0.0	0.0; 0.0
16; 32	7:38027816:A:G; 7:38064803:C:T	rs2598097; rs1721399	7	38027816; 38064803	3.08916e-10; 1.28345e-11	38049092	38089917	13; 45	10; 42	1; 1	rs2598097; rs1721399	1; 1	rs2598097; rs1721399	vit_T2; vit_T1	rs2598097; rs1721399	SFRP4; SFRP4	ENSG00000106483; ENSG00000106483	6424; 6424.0	SFRP4; SFRP4	4.45782556410063e-05; 4.45782556410063e-05	0.225244305; 0.225244305	11.0; 14.0	14.05; 11.97	3.08916e-10; 1.28345e-11	Heel bone mineral density; Whole brain restricted isotropic diffusion (multivariate analysis)	Identification of 613 new loci associated with heel bone mineral density and a polygenic risk score for bone mineral density, osteoporosis and fracture.; Identification of 153 new loci associated with heel bone mineral density and functional involvement of GPC6 in osteoporosis.; Multivariate genome-wide association study on tissue-sensitive diffusion metrics highlights pathways that shape the hum…	30048462; 28869591; 35505052	2e-194	0.0777066; 0.069817; 0.0724659	SFRP4; SFRP4	0; 0	intronic; intronic	1.142; 1.835		1.0; 1.0	0.0; 0.0	0.0; 0.0
17; 33	7:96212917:C:T; 7:96215107:C:T	rs62471424; rs4335059	7	96212917; 96215107	1.44999e-11; 3.33708e-13	96150233	96254519	144; 141	116; 114	1; 1	rs62471424; rs4335059	1; 1	rs62471424; rs4335059	vit_T2; vit_T1	rs62471424; rs4335059	SHFM1; SHFM1	ENSG00000127922; ENSG00000127922	7979; 7979.0	SHFM1; SHFM1	0.418592332178749; 0.418592332178749	-0.181498149; -0.181498149	144.0; 141.0	19.47; 19.47	1.44999e-11; 3.33708e-13	Vertex-wise sulcal depth; Vertex-wise cortical surface area; Vertex-wise cortical thickness; Whole brain restricted directional diffusion (multivariate analysis); Facial morphology (segment 54); Vertex-wise sulcal depth; Vertex-wise cortical surface area; Vertex-wise cortical thickness; Whole brain restricted directional diffusion (multivariate analysis); Facial morphology (segment 54)	The genetic architecture of human cortical folding.; Multivariate genome-wide association study on tissue-sensitive diffusion metrics highlights pathways that shape the human brain.; Insights into the genetic architecture of the human face.; The genetic architecture of human cortical folding.; Multivariate genome-wide association study on tissue-sensitive diffusion metrics highlights pathways tha…	34910505; 35505052; 33288918; 34910505; 35505052; 33288918	5e-324; 5e-324	26.35; 20.47; 26.35; 20.47	SHFM1; SHFM1	0; 0	intergenic; intergenic	0.965; 2.536	7.0; 6.0	1.0; 1.0	0.0; 0.0	0.0; 0.0
18; 35	7:120974765:A:G; 7:120994169:G:T	rs3801387; rs3801383	7	120974765; 120994169	5.2855399999999995e-50; 3.94687e-47	120703161	121040782	258; 353	222; 302	17; 15	rs73433974;rs77345085;rs798908;rs76042375;rs2908004;rs2110279;rs798914;rs798906;rs798903;rs798902;rs798901;rs6961083;rs2908007;rs17284876;rs17143281;rs17509082;rs3801387; rs2110279;rs798908;rs2908004;rs67991850;rs4731006;rs4731009;rs2536150;rs2707521;rs3801383;rs1541509;rs17509082;rs2707520;rs76042375;rs2536196;rs2952565	4; 4	rs73433974;rs798914;rs17143281;rs3801387; rs2110279;rs67991850;rs3801383;rs2952565	vit_T2; vit_T1	rs73433974; rs2110279	CPED1; WNT16; FAM3C; CPED1; WNT16; FAM3C	ENSG00000106034; ENSG00000002745; ENSG00000196937; ENSG00000106034; ENSG00000002745; ENSG00000196937	79974; 51384; 10447; 79974.0; 51384.0; 10447.0	CPED1; WNT16; FAM3C; CPED1; WNT16; FAM3C	0.0004220777688709; 0.0004220777688709	-0.7898043156666666; -0.7898043156666666	255.0; 350.0	23.4; 23.4	5.28554e-50; 3.94687e-47	Heel bone mineral density; Heel bone mineral density	Identification of 613 new loci associated with heel bone mineral density and a polygenic risk score for bone mineral density, osteoporosis and fracture.; Identification of 153 new loci associated with heel bone mineral density and functional involvement of GPC6 in osteoporosis.; Leveraging Polygenic Functional Enrichment to Improve GWAS Power.; Genotype-by-environment interactions inferred from g…	30048462; 28869591; 30595370; 31453325; 30048462; 28869591; 31453325	0.0; 0.0	0.17; 0.17	CPED1; CPED1	0; 0	intronic; intronic	1.133; 1.986	5.0; 7.0	1.0; 1.0	0.0; 0.0	0.0; 0.0
21; 38	9:16681993:C:G; 9:16694836:A:G	rs3904778; rs10733314	9	16681993; 16694836	4.21764e-16; 3.17617e-14	16680138	16710121	61; 61	49; 49	1; 1	rs3904778; rs10733314	1; 1	rs3904778; rs10733314	vit_T2; vit_T1	rs3904778; rs10733314	BNC2; BNC2	ENSG00000173068; ENSG00000173068	54796; 54796.0	BNC2; BNC2	0.999465645265111; 0.999465645265111	0.551639085; 0.551639085	61.0; 61.0	20.1; 20.1	4.21764e-16; 3.17617e-14	Heel bone mineral density; Adolescent idiopathic scoliosis; Vertex-wise sulcal depth; Heel bone mineral density; Adolescent idiopathic scoliosis; Vertex-wise sulcal depth	Leveraging Polygenic Functional Enrichment to Improve GWAS Power.; Identification of 613 new loci associated with heel bone mineral density and a polygenic risk score for bone mineral density, osteoporosis and fracture.; An atlas of genetic influences on osteoporosis in humans and mice.; Genome-wide association study identifies 14 previously unreported susceptibility loci for adolescent idiopathi…	30595370; 30048462; 30598549; 31417091; 34910505; 30595370; 30048462; 30598549; 31417091; 34910505	3.0000000000000003e-31; 3.0000000000000003e-31	0.0290091; 0.0231928; 0.0290091; 0.0231928	BNC2; BNC2	0; 0	intronic; intronic	1.284; 15.25	7.0; 7.0	1.0; 1.0	0.0; 0.0	0.0; 0.0
40; 22	9:119061396:A:G; 9:119061396:A:G	rs72754248; rs72754248	9	119061396; 119061396	5.60374e-14; 1.935e-13	118918479	119098518	42; 41	33; 33	2; 2	rs3789281;rs72754248; rs449807;rs72754248	2; 2	rs3789281;rs72754248; rs449807;rs72754248	vit_T1; vit_T2	rs3789281; rs449807	PAPPA; PAPPA	ENSG00000182752; ENSG00000182752	5069.0; 5069	PAPPA; PAPPA	0.967751416645701; 0.967751416645701	0.117429697; 0.117429697	42.0; 41.0	20.6; 20.6	5.60374e-14; 1.935e-13	Total cerebellar volume; Brain morphology (MOSTest); Subcortical volume (MOSTest); Brain region volumes; Total cerebellar volume; Brain morphology (MOSTest); Subcortical volume (MOSTest); Brain region volumes	Genome-wide association study of cerebellar volume provides insights into heritable mechanisms underlying brain development and mental health.; Boosting Schizophrenia Genetics by Utilizing Genetic Overlap With Brain Morphology.; Understanding the genetic determinants of the brain with MOSTest.; Genome-wide association analysis of 19,629 individuals identifies variants influencing regional brain v…	35842455; 35164939; 32665545; 31676860; 35842455; 35164939; 32665545; 31676860	5e-51; 5e-51	2574.39; 2574.39	PAPPA; PAPPA	0; 0	intronic; intronic	4.835; 8.702	4.0; 5.0	1.0; 1.0	0.0; 0.0	0.0; 0.0
43; 24	10:50290496:A:G; 10:50372347:C:T	rs58154726; rs2003044	10	50290496; 50372347	3.46879e-11; 2.32958e-11	50253187	50372347	139; 160	124; 142	2; 2	rs58154726;rs4838367; rs2003044;rs6537497	1; 1	rs58154726; rs2003044	vit_T1; vit_T2	rs58154726; rs2003044	VSTM4; FAM170B; C10orf128; VSTM4; FAM170B; C10orf128	ENSG00000165633; ENSG00000172538; ENSG00000204161; ENSG00000165633; ENSG00000172538; ENSG00000204161	196740.0; 170370.0; 170371.0; 196740; 170370; 170371	VSTM4; FAM170B; C10orf128; VSTM4; FAM170B; C10orf128	0.1002640520196455; 0.1002640520196455	0.6942655950000001; 0.6942655950000001	139.0; 160.0	15.06; 19.14	3.46879e-11; 2.32958e-11	Vertex-wise sulcal depth; Whole brain restricted isotropic diffusion (multivariate analysis); Vertex-wise cortical thickness; Whole brain free water diffusion (multivariate analysis); Whole brain restricted directional diffusion (multivariate analysis); Vertex-wise sulcal depth; Whole brain restricted isotropic diffusion (multivariate analysis); Vertex-wise cortical thickness; Lymphocyte count; W…	The genetic architecture of human cortical folding.; Multivariate genome-wide association study on tissue-sensitive diffusion metrics highlights pathways that shape the human brain.; The genetic architecture of human cortical folding.; Multivariate genome-wide association study on tissue-sensitive diffusion metrics highlights pathways that shape the human brain.; A cross-population atlas of genet…	34910505; 35505052; 34910505; 35505052; 34594039	6e-80; 6e-80	18.93; 11.97; 18.93; 11.97	VSTM4; C10orf128	0; 0	intronic; intronic	1.087; 4.826	6.0	1.0; 1.0	0.0; 0.0	0.0; 0.0
25; 44	10:94940825:C:G; 10:94962714:G:T	rs11187314; rs7894625	10	94940825; 94962714	2.83472e-15; 1.08488e-16	94874110	95007493	176; 219	147; 189	6; 9	rs10882156;rs12248367;rs11187314;rs4326721;rs7070947;rs4918429; rs10882139;rs10882156;rs4917613;rs7894625;rs7084981;rs12767937;rs12775400;rs2797576;rs72815155	2; 3	rs10882156;rs11187314; rs10882139;rs10882156;rs7894625	vit_T2; vit_T1	rs10882156; rs10882139	EXOC6; CYP26C1; CYP26A1; MYOF	ENSG00000138190; ENSG00000187553; ENSG00000095596; ENSG00000138119	54536.0; 340665.0; 1592.0; 26509.0	EXOC6; CYP26C1; CYP26A1; MYOF	0.0127954917682537	-0.07864434725	49.0	21.6	3.75055e-11	Whole brain restricted directional diffusion (multivariate analysis); Vertical cup-disc ratio (multi-trait analysis); Whole brain restricted isotropic diffusion (multivariate analysis); Vertical cup-disc ratio; Lung function (FVC); Intraocular pressure; Corneal resistance factor (MTAG); Central corneal thickness (MTAG); Sex hormone-binding globulin levels adjusted for BMI; Sex hormone-binding glo…	Multivariate genome-wide association study on tissue-sensitive diffusion metrics highlights pathways that shape the human brain.; Multitrait analysis of glaucoma identifies new risk loci and enables polygenic prediction of disease susceptibility and progression.; Large-scale machine-learning-based phenotyping significantly improves genomic discovery for optic nerve head morphology.; Leveraging Po…	35505052; 31959993; 34077760; 30595370; 29617998; 35446358; 32042192	7e-18; 1e-36	0.007; 0.1736; 0.049147; 2.37009	NIP7P1; EXOC6	41817; 0	intergenic; intronic	3.702; 3.974	6.0; 6.0	0.0; 1.0	0.0; 0.0	0.0; 0.0
46; 26	11:10674044:C:G; 11:10674044:C:G	rs4910165; rs4910165	11	10674044; 10674044	1.72747e-12; 5.7126e-16	10655623	10699750	32; 36	32; 35	2; 3	rs4910165;rs10770131; rs4910165;rs10770131;rs1035691	1; 1	rs4910165; rs4910165	vit_T1; vit_T2	rs4910165; rs4910165	MRVI1; MRVI1	ENSG00000072952; ENSG00000072952	10335.0; 10335	MRVI1; MRVI1	0.0018412152471268; 0.0018412152471268	-0.670039603; -0.670039603	32.0; 36.0	17.09; 17.09	1.72747e-12; 5.7126e-16	Mean platelet volume; Migraine and/or diastolic blood pressure; Platelet count; Mean platelet volume; Migraine and/or diastolic blood pressure; Platelet count	Trans-ethnic and Ancestry-Specific Blood-Cell Genetics in 746,667 Individuals from 5 Global Populations.; The Polygenic and Monogenic Basis of Blood Traits and Diseases.; A genome-wide cross-phenotype meta-analysis of the association of blood pressure with migraine.; Trans-ethnic and Ancestry-Specific Blood-Cell Genetics in 746,667 Individuals from 5 Global Populations.; The Polygenic and Monogen…	32888493; 32888494; 32632093; 32888493; 32888494; 32632093	1e-53; 1e-53	0.031866; 0.029178174; 0.031866; 0.029178174	MRVI1; MRVI1	0; 0	intronic; intronic	2.047; 2.047	7.0; 7.0	1.0; 1.0	0.0; 0.0	0.0; 0.0
50; 27	11:110950448:A:C; 11:111056158:A:G	rs7941114; rs58066679	11	110950448; 111056158	1.49058e-10; 2.10013e-12	110945939	111040637	59; 67	54; 60	1; 4	rs7941114; rs7941114;rs58066679;rs61900578;rs34077344	1; 2	rs7941114; rs7941114;rs58066679	vit_T1; vit_T2	rs7941114; rs7941114										Vertex-wise sulcal depth; Vertex-wise cortical thickness; Whole brain restricted isotropic diffusion (multivariate analysis); Whole brain restricted directional diffusion (multivariate analysis); Whole brain free water diffusion (multivariate analysis); Vertex-wise sulcal depth; Vertex-wise cortical thickness; Vertex-wise cortical surface area; Whole brain restricted isotropic diffusion (multivar…	The genetic architecture of human cortical folding.; Multivariate genome-wide association study on tissue-sensitive diffusion metrics highlights pathways that shape the human brain.; The genetic architecture of human cortical folding.; Multivariate genome-wide association study on tissue-sensitive diffusion metrics highlights pathways that shape the human brain.	34910505; 35505052; 34910505; 35505052	2e-121; 2e-121	23.44; 15.53; 23.44; 15.53; 14.48	RP11-89C3.3; RP11-89C3.3	10145; 10145	intergenic; intergenic	2.429; 2.429	7.0; 7.0	0.0; 0.0	0.0; 0.0	0.0; 0.0
29; 51	12:28246901:C:G; 12:28348136:A:G	rs11049337; rs61920242	12	28246901; 28348136	3.67424e-21; 5.155789999999999e-20	28194223	28740649	1001; 972	843; 820	12; 20	rs6487660;rs1479488;rs11049337;rs1813000;rs11049350;rs7305790;rs11049415;rs61920563;rs4931080;rs1511548;rs6487655;rs10843083; rs10843074;rs11049310;rs722885;rs11049329;rs61920200;rs11049431;rs10843072;rs6487660;rs10843088;rs11049327;rs405394;rs61920242;rs7316831;rs2348418;rs11049713;rs926150;rs11834117;rs11049353;rs75351141;rs61920203	2; 4	rs6487660;rs11049337; rs10843074;rs6487660;rs61920242;rs75351141	vit_T2; vit_T1	rs6487660; rs10843074	CCDC91; CCDC91	ENSG00000123106; ENSG00000123106	55297; 55297.0	CCDC91; CCDC91	3.15157303302004e-05; 3.15157303302004e-05	0.458621643; 0.458621643	865.0; 817.0	19.67; 18.93	1.04371e-18; 5.155789999999999e-20	Height; Vertex-wise sulcal depth; Lung function (FVC); Whole brain restricted isotropic diffusion (multivariate analysis); Height; Vertex-wise sulcal depth; Lung function (FVC); Whole brain restricted isotropic diffusion (multivariate analysis)	Leveraging Polygenic Functional Enrichment to Improve GWAS Power.; The genetic architecture of human cortical folding.; New genetic signals for lung function highlight pathways and chronic obstructive pulmonary disease associations across multiple ancestries.; Multivariate genome-wide association study on tissue-sensitive diffusion metrics highlights pathways that shape the human brain.; Leveragi…	30595370; 34910505; 30804560; 35505052; 30595370; 34910505; 30804560; 35505052	2.9999999999999998e-114; 2.9999999999999998e-114	20.5; 20.5	CCDC91; PTHLH	64174; 67943	intergenic; intergenic	1.704; 6.716	7.0; 5.0	0.0; 0.0	0.0; 0.0	0.0; 0.0
52; 30	12:65905126:C:T; 12:65905126:C:T	rs79487293; rs79487293	12	65905126; 65905126	5.26736e-28; 2.813460000000001e-18	65894817	65915317	14; 1	13; 1	2; 1	rs79487293;rs6581641; rs79487293	1; 1	rs79487293; rs79487293	vit_T1; vit_T2	rs79487293; rs79487293										Vertex-wise sulcal depth; Vertex-wise cortical thickness; Whole brain restricted isotropic diffusion (multivariate analysis); Whole brain restricted directional diffusion (multivariate analysis); Whole brain free water diffusion (multivariate analysis); Vertex-wise sulcal depth; Vertex-wise cortical thickness; Whole brain restricted isotropic diffusion (multivariate analysis); Whole brain restric…	The genetic architecture of human cortical folding.; Multivariate genome-wide association study on tissue-sensitive diffusion metrics highlights pathways that shape the human brain.; The genetic architecture of human cortical folding.; Multivariate genome-wide association study on tissue-sensitive diffusion metrics highlights pathways that shape the human brain.	34910505; 35505052; 34910505; 35505052	3e-110; 3e-110	22.31; 14.0; 22.31; 14.0	RP11-230G5.2; RP11-230G5.2	0; 0	ncRNA_intronic; ncRNA_intronic	17.35; 17.35	4.0; 4.0	0.0; 0.0	0.0; 0.0	0.0; 0.0
31; 53	12:106476805:C:T; 12:106510413:C:T	rs12146713; rs12370774	12	106476805; 106510413	9.36666e-24; 3.76241e-34	106443251	106510413	20; 164	19; 150	4; 8	rs12146713;rs12369969;rs1427793;rs3741884; rs2217685;rs11112850;rs75436288;rs12370774;rs12369969;rs1427793;rs73193841;rs2059769	1; 3	rs12146713; rs2217685;rs75436288;rs12370774	vit_T2; vit_T1	rs12146713; rs2217685	NUAK1; NUAK1	ENSG00000074590; ENSG00000074590	9891; 9891.0	NUAK1; NUAK1	0.189029672518911; 0.189029672518911	0.541314246; 0.541314246	19.0; 27.0	19.59; 19.59	9.36666e-24; 3.76241e-34	Vertex-wise sulcal depth; Whole brain restricted isotropic diffusion (multivariate analysis); Whole brain free water diffusion (multivariate analysis); Whole brain restricted directional diffusion (multivariate analysis); Vertex-wise cortical surface area; Vertex-wise sulcal depth; Whole brain restricted isotropic diffusion (multivariate analysis); Whole brain free water diffusion (multivariate a…	The genetic architecture of human cortical folding.; Multivariate genome-wide association study on tissue-sensitive diffusion metrics highlights pathways that shape the human brain.; The genetic architecture of human cortical folding.; Multivariate genome-wide association study on tissue-sensitive diffusion metrics highlights pathways that shape the human brain.	34910505; 35505052; 34910505; 35505052	1e-260; 1e-260	34.48; 34.48	NUAK1; ST13P3	0; 17244	intronic; intergenic	19.59; 3.123	5.0; 5.0	1.0; 0.0	0.0; 0.0	0.0; 0.0
56; 32	14:54410919:C:T; 14:54421917:C:G	rs4444235; rs2855530	14	54410919; 54421917	9.97741e-11; 1.96642e-12	54411057	54419106	10; 27	8; 21	1; 3	rs4444235; rs2855530;rs8014363;rs2358432	1; 1	rs4444235; rs2855530	vit_T1; vit_T2	rs4444235; rs2855530	BMP4; BMP4	ENSG00000125378; ENSG00000125378	652.0; 652	BMP4; BMP4	0.967466005226941; 0.967466005226941	-0.512221976; -0.512221976	10.0; 27.0	22.3; 22.3	9.97741e-11; 1.96642e-12	Heel bone mineral density; Lung function (FEV1/FVC); Heel bone mineral density; Spherical equivalent; Whole brain restricted isotropic diffusion (multivariate analysis)	Leveraging Polygenic Functional Enrichment to Improve GWAS Power.; Identification of 613 new loci associated with heel bone mineral density and a polygenic risk score for bone mineral density, osteoporosis and fracture.; An atlas of genetic influences on osteoporosis in humans and mice.; New genetic signals for lung function highlight pathways and chronic obstructive pulmonary disease association…	30595370; 30048462; 30598549; 30804560; 30048462; 30598549; 32352494; 35505052	9e-197; 2e-110	0.0635749; 0.0343817; 0.0476138; 0.0343817; 0.0280415	MIR5580; BMP4	4225; 0	intergenic; intronic	6.363; 9.429	5.0; 4.0	1.0; 1.0	0.0; 0.0	0.0; 0.0
33; 59	15:58243204:A:G; 15:58367677:A:G	rs1441819; rs2704194	15	58243204; 58367677	2.35334e-18; 1.77573e-17	58188859	58385264	305; 327	270; 289	9; 9	rs1441819;rs4646615;rs4646586;rs34958088;rs4646572;rs2464469;rs8035107;rs7175739;rs8042779; rs2704194;rs8035107;rs12906402;rs2028504;rs62003165;rs1063666;rs4646586;rs11857465;rs2899611	1; 1	rs1441819; rs2704194	vit_T2; vit_T1	rs1441819; rs2704194	ALDH1A2; ALDH1A2; AQP9	ENSG00000128918; ENSG00000128918; ENSG00000103569	101928635; 101928635.0; 366.0	ALDH1A2; ALDH1A2; AQP9	0.516630055977224; 0.4816223634526405	1.671453522; 1.7319793154999998	248.0; 281.0	19.71; 19.71	2.35334e-18; 1.77573e-17	Vertex-wise sulcal depth; Whole brain restricted isotropic diffusion (multivariate analysis); Whole brain free water diffusion (multivariate analysis); Whole brain restricted directional diffusion (multivariate analysis); Vertex-wise cortical surface area; Vertex-wise sulcal depth; Whole brain restricted isotropic diffusion (multivariate analysis); Whole brain free water diffusion (multivariate a…	The genetic architecture of human cortical folding.; Multivariate genome-wide association study on tissue-sensitive diffusion metrics highlights pathways that shape the human brain.; The genetic architecture of human cortical folding.; Multivariate genome-wide association study on tissue-sensitive diffusion metrics highlights pathways that shape the human brain.	34910505; 35505052; 34910505; 35505052	1e-65; 1e-65	17.12; 17.12	ALDH1A2; ALDH1A2	2417; 0	intergenic; intronic	0.107; 7.498	5.0	1.0; 1.0	0.0; 0.0	0.0; 0.0
34; 60	16:87225101:A:G; 16:87233185:A:C	rs9937293; rs4843553	16	87225101; 87233185	5.73276e-19; 6.95268e-22	87220694	87264534	117; 101	102; 86	8; 5	rs9937293;rs4240791;rs62650864;rs1108048;rs12919133;rs8054379;rs4843231;rs9783786; rs4843553;rs55807115;rs35555768;rs28655023;rs9940975	1; 1	rs9937293; rs4843553	vit_T2; vit_T1	rs9937293; rs4843553	C16orf95; C16orf95	ENSG00000260456; ENSG00000260456	100506581; 100506581.0	C16orf95; C16orf95		0.915813928; 0.915813928	117.0; 101.0	16.49; 16.49	5.73276e-19; 6.95268e-22	Vertex-wise sulcal depth; Vertex-wise cortical thickness; Vertex-wise cortical surface area; Whole brain free water diffusion (multivariate analysis); Whole brain restricted isotropic diffusion (multivariate analysis); Vertex-wise sulcal depth; Vertex-wise cortical thickness; Vertex-wise cortical surface area; Whole brain free water diffusion (multivariate analysis); Whole brain restricted isotro…	The genetic architecture of human cortical folding.; Multivariate genome-wide association study on tissue-sensitive diffusion metrics highlights pathways that shape the human brain.; The genetic architecture of human cortical folding.; Multivariate genome-wide association study on tissue-sensitive diffusion metrics highlights pathways that shape the human brain.	34910505; 35505052; 34910505; 35505052	5e-324; 5e-324	33.41; 26.92; 33.41; 26.92	C16orf95; C16orf95	0; 0	intergenic; intergenic	1.793; 0.781	7.0	1.0; 1.0	0.0; 0.0	0.0; 0.0
Supp Table 4 Overlap of SM-UDIP loci T1 T2

## Sheet: Table5-All loci SM-UDIP
GenomicLocus	uniqID	rsID	chr	pos	p	start	end	nSNPs	nGWASSNPs	nIndSigSNPs	IndSigSNPs	nLeadSNPs	LeadSNPs	SOURCE	LeadSNP	symbol	ensg	entrezID	HUGO	pLI	ncRVIS	posMapSNPs	posMapMaxCADD	minGwasP	GWAS_Trait	GWAS_Study	GWAS_PMID	GWAS_P_min	GWAS_OrBeta_top	nearestGene	dist	func	CADD	RDB	posMapFilt	eqtlMapFilt	ciMapFilt	nGWAS_Traits
1; 1	1:47980916:G:T; 1:47980916:G:T	rs6658111; rs6658111	1	47980916; 47980916	1.94056e-27; 1.3701399999999998e-20	47745564	48121205	117; 75	106; 66	8; 7	rs6658111;rs72688340;rs12118339;rs6681140;rs7552140;rs11211538;rs6668106;rs515146; rs6658111;rs72688340;rs12118339;rs524158;rs11211538;rs56034078;rs515146	1; 1	rs6658111; rs6658111	vit_T1; vit_T2	rs6658111; rs6658111	FOXE3; FOXD2; FOXE3; FOXD2	ENSG00000186790; ENSG00000186564; ENSG00000186790; ENSG00000186564	2301.0; 2306.0; 2301; 2306	FOXE3; FOXD2; FOXE3; FOXD2		-0.4660067805; -0.4660067805	38.0; 25.0	15.62; 15.51	2.16513e-10; 1.0971e-09	Vertex-wise sulcal depth; Whole brain restricted directional diffusion (multivariate analysis); Whole brain restricted isotropic diffusion (multivariate analysis); Vertex-wise cortical thickness; Whole brain free water diffusion (multivariate analysis); Vertex-wise sulcal depth; Whole brain restricted directional diffusion (multivariate analysis); Whole brain restricted isotropic diffusion (multi…	The genetic architecture of human cortical folding.; Multivariate genome-wide association study on tissue-sensitive diffusion metrics highlights pathways that shape the human brain.; Multivariate genome-wide association study on tissue-sensitive diffusion metrics highlights pathways that shape the human brain.; The genetic architecture of human cortical folding.; Multivariate genome-wide associat…	34910505; 35505052; 35505052; 34910505; 35505052; 34910505; 35505052; 35505052; 34910505; 35505052	5e-324; 8e-265; 2.0000000000000003e-237; 4e-229; 2.0000000000000002e-212; 5e-324; 8e-265; 2.0000000000000003e-237; 4e-229; 2.0000000000000002e-212	32.31; 32.31	AL356458.1; AL356458.1	12604; 12604	intergenic; intergenic	11.75; 11.75	5.0; 5.0	0.0; 0.0	0.0; 0.0	0.0; 0.0	10
2	1:103215963:C:T	rs9787064	1	103215963	2.44971e-10	103085619	103524208	88	75	1	rs9787064	1	rs9787064	vit_T1	rs9787064	COL11A1	ENSG00000060718	1301.0	COL11A1	0.999980608468386	-0.402318052	24.0	25.5	7.75097e-10	Glaucoma (primary angle closure); Glaucoma (primary angle closure); Hip bone size; Heel bone mineral density; Whole brain restricted isotropic diffusion (multivariate analysis)	Genome-wide association study identifies five new susceptibility loci for primary angle closure glaucoma.; Genome-wide association study identifies five new susceptibility loci for primary angle closure glaucoma.; GWAS of bone size yields twelve loci that also affect height, BMD, osteoarthritis or fractures.; Leveraging Polygenic Functional Enrichment to Improve GWAS Power.; Multivariate genome-w…	27064256; 27064256; 31053729; 30595370; 35505052	1.0000000000000001e-23; 4e-21; 1e-20; 1e-19; 2e-17	1.21; 1.21; 0.068	RP5-936J12.1	12914	intergenic	1.358	7.0	0.0	0.0	0.0	5
3	1:180909061:C:T	rs1609829	1	180909061	3.50874e-10	180778388	181034062	3	2	1	rs1609829	1	rs1609829	vit_T1	rs1609829	KIAA1614	ENSG00000135835	57710.0	KIAA1614	2.19336786808695e-13	1.262076767	3.0	4.449	3.50874e-10	Height; Estimated glomerular filtration rate (creatinine); Whole brain free water diffusion (multivariate analysis); Estimated glomerular filtration rate (creatinine); Monocyte count	Leveraging Polygenic Functional Enrichment to Improve GWAS Power.; Epigenomic and transcriptomic analyses define core cell types, genes and targetable mechanisms for kidney disease.; Multivariate genome-wide association study on tissue-sensitive diffusion metrics highlights pathways that shape the human brain.; Discovery and prioritization of variants and genes for kidney function in >1.2 million…	30595370; 35710981; 35505052; 34272381; 32888493	1.0000000000000001e-23; 2.0000000000000002e-23; 2e-21; 6e-21; 2e-20	9.957; 0.00252; 0.01889	KIAA1614	0	intronic	0.346	5.0	1.0	0.0	0.0	5
4	1:215137222:A:C	rs6540873	1	215137222	4.59007e-12	215010413	215278068	20	19	1	rs6540873	1	rs6540873	vit_T1	rs6540873										Vertex-wise cortical thickness; Whole brain free water diffusion (multivariate analysis); Whole brain restricted directional diffusion (multivariate analysis); Whole brain restricted isotropic diffusion (multivariate analysis); Vertex-wise sulcal depth	The genetic architecture of human cortical folding.; Multivariate genome-wide association study on tissue-sensitive diffusion metrics highlights pathways that shape the human brain.; Multivariate genome-wide association study on tissue-sensitive diffusion metrics highlights pathways that shape the human brain.; Multivariate genome-wide association study on tissue-sensitive diffusion metrics highl…	34910505; 35505052; 35505052; 35505052; 34910505	5.9999999999999995e-142; 9e-80; 2e-73; 6e-63; 9e-35	25.37; 12.3	RP11-323K10.1	20338	intergenic	6.348	6.0	0.0	0.0	0.0	5
5	2:18711415:C:T	rs4832441	2	18711415	2.85474e-10	18577074	18847425	15	14	1	rs4832441	1	rs4832441	vit_T1	rs4832441										Whole brain restricted isotropic diffusion (multivariate analysis); Whole brain restricted directional diffusion (multivariate analysis); Whole brain free water diffusion (multivariate analysis); Vertex-wise cortical thickness; Sex hormone-binding globulin levels adjusted for BMI	Multivariate genome-wide association study on tissue-sensitive diffusion metrics highlights pathways that shape the human brain.; Multivariate genome-wide association study on tissue-sensitive diffusion metrics highlights pathways that shape the human brain.; Multivariate genome-wide association study on tissue-sensitive diffusion metrics highlights pathways that shape the human brain.; The genet…	35505052; 35505052; 35505052; 34910505; 32042192	5e-36; 9e-31; 1e-27; 7e-14; 5e-11	7.49; 0.00526056	RP11-111J6.2	17236	intergenic	1.213	7.0	0.0	0.0	0.0	5
6	2:19184217:A:G	rs2346965	2	19184217	1.61995e-10	19056851	19312220	9	9	1	rs2346965	1	rs2346965	vit_T1	rs2346965										White matter microstructure (radial diusivities); Brain region volumes; White matter microstructure (mean diusivities); White matter microstructure (fractional anisotropy)	Large-scale GWAS reveals genetic architecture of brain white matter microstructure and genetic overlap with cognitive and mental health traits (n = 17,706).; Genome-wide association analysis of 19,629 individuals identifies variants influencing regional brain volumes and refines their genetic co-architecture with cognitive and mental health traits.; Large-scale GWAS reveals genetic architecture o…	31666681; 31676860; 31666681; 31666681	1e-08; 3e-08; 3e-08; 4e-08		AC092594.1	0	ncRNA_intronic	2.523		0.0	0.0	0.0	4
7	2:60633364:A:G	rs13009393	2	60633364	9.71887e-12	60478950	60797772	71	59	1	rs13009393	1	rs13009393	vit_T1	rs13009393	BCL11A	ENSG00000119866	53335.0	BCL11A	0.828999684744843	-2.033900679	4.0	4.064	2.90593e-07	Mean corpuscular volume; Mean corpuscular volume; Mean corpuscular hemoglobin; Mean corpuscular hemoglobin; Mean corpuscular hemoglobin	Trans-ethnic and Ancestry-Specific Blood-Cell Genetics in 746,667 Individuals from 5 Global Populations.; Trans-ethnic and Ancestry-Specific Blood-Cell Genetics in 746,667 Individuals from 5 Global Populations.; Trans-ethnic and Ancestry-Specific Blood-Cell Genetics in 746,667 Individuals from 5 Global Populations.; Trans-ethnic and Ancestry-Specific Blood-Cell Genetics in 746,667 Individuals fro…	32888493; 32888493; 32888493; 32888493; 30595370	1e-205; 1e-204; 9.000000000000001e-163; 2.0000000000000002e-159; 2e-147	0.056339; 0.053224	AC007381.2	14853	intergenic	12.97	5.0	0.0	0.0	0.0	5
8; 2	2:65970775:C:T; 2:65991546:C:T	rs2287282; rs2193469	2	65970775; 65991546	4.17551e-12; 3.45756e-16	65812041	66124624	30; 79	27; 70	1; 3	rs2287282; rs2193469;rs10203155;rs1549022	1; 1	rs2287282; rs2193469	vit_T1; vit_T2	rs2287282; rs2193469										Vertex-wise sulcal depth; Whole brain restricted directional diffusion (multivariate analysis); Vertex-wise cortical surface area; Brain shape (segment 22); Vertex-wise cortical thickness; Vertex-wise sulcal depth; Whole brain restricted directional diffusion (multivariate analysis); Vertex-wise cortical surface area; Brain shape (segment 22); Vertex-wise cortical thickness	The genetic architecture of human cortical folding.; Multivariate genome-wide association study on tissue-sensitive diffusion metrics highlights pathways that shape the human brain.; The genetic architecture of human cortical folding.; Shared heritability of human face and brain shape.; The genetic architecture of human cortical folding.; The genetic architecture of human cortical folding.; Multi…	34910505; 35505052; 34910505; 33821002; 34910505; 34910505; 35505052; 34910505; 33821002; 34910505	1e-240; 2e-99; 1e-78; 1e-74; 1.0000000000000001e-72; 1e-240; 2e-99; 1e-78; 1e-74; 1.0000000000000001e-72	33.13; 18.79; 18.03; 33.13; 18.79; 18.03	AC074391.1; AC074391.1	0; 0	ncRNA_intronic; ncRNA_intronic	1.017; 1.472	6.0; 5.0	0.0; 0.0	0.0; 0.0	0.0; 0.0	10
3; 9	2:71954468:A:G; 2:71956043:A:G	rs6760396; rs12475748	2	71954468; 71956043	6.33957e-14; 2.98563e-17	71823791	72134918	66; 97	59; 83	2; 3	rs6760396;rs13033431; rs12475748;rs1427687;rs4638819	1; 1	rs6760396; rs12475748	vit_T2; vit_T1	rs6760396; rs12475748										Whole brain restricted isotropic diffusion (multivariate analysis); Vertex-wise sulcal depth; Height; Whole brain restricted directional diffusion (multivariate analysis); Appendicular lean mass; Whole brain restricted isotropic diffusion (multivariate analysis); Vertex-wise sulcal depth; Height; Whole brain restricted directional diffusion (multivariate analysis); Appendicular lean mass	Multivariate genome-wide association study on tissue-sensitive diffusion metrics highlights pathways that shape the human brain.; The genetic architecture of human cortical folding.; Leveraging Polygenic Functional Enrichment to Improve GWAS Power.; Multivariate genome-wide association study on tissue-sensitive diffusion metrics highlights pathways that shape the human brain.; The genetic archite…	35505052; 34910505; 30595370; 35505052; 33097823; 35505052; 34910505; 30595370; 35505052; 33097823	6e-26; 6e-26; 8e-20; 9e-14; 6e-13; 6e-26; 6e-26; 8e-20; 9e-14; 6e-13	10.53; 0.0141; 10.53; 0.0141	DYSF; DYSF	40569; 42144	intergenic; intergenic	9.022; 7.039	5.0; 7.0	0.0; 0.0	0.0; 0.0	0.0; 0.0	10
10	2:73014472:A:C	rs11126381	2	73014472	1.61002e-11	72602731	73239353	87	72	1	rs11126381	1	rs11126381	vit_T1	rs11126381	EXOC6B; SPR	ENSG00000144036; ENSG00000116096	23233.0; 6697.0	EXOC6B; SPR	0.3333686544587211	0.4028835719999999	68.0	20.8	1.61002e-11	Vertex-wise sulcal depth; Whole brain restricted isotropic diffusion (multivariate analysis); Diastolic blood pressure; Cortical surface area; Diastolic blood pressure	The genetic architecture of human cortical folding.; Multivariate genome-wide association study on tissue-sensitive diffusion metrics highlights pathways that shape the human brain.; High Blood Pressure and Intraocular Pressure: A Mendelian Randomization Study.; Vertex-wise multivariate genome-wide association study identifies 780 unique genetic loci associated with cortical morphology.; Genome-w…	34910505; 35505052; 35762941; 34560273; 27841878	2e-16; 9e-11; 2e-10; 2e-09; 2e-09	8.24; 0.1474; 0.162	EXOC6B	0	intronic	2.366	6.0	1.0	0.0	0.0	5
11	2:85510400:A:G	rs34644194	2	85510400	2.92679e-10	85365112	85638239	14	11	1	rs34644194	1	rs34644194	vit_T1	rs34644194	TCF7L1	ENSG00000152284	83439.0	TCF7L1	0.753752010042604		14.0	7.803	2.92679e-10	Pulse pressure; Heel bone mineral density; Pulse pressure; Heel bone mineral density; Heel bone mineral density	A cross-population atlas of genetic associations for 220 human phenotypes.; An atlas of genetic influences on osteoporosis in humans and mice.; Genome-wide association analyses using electronic health records identify new loci influencing blood pressure variation.; Identification of 613 new loci associated with heel bone mineral density and a polygenic risk score for bone mineral density, osteopo…	34594039; 30598549; 27841878; 30048462; 30595370	6e-22; 5e-13; 2e-12; 1e-11; 6e-11	0.0181; 0.0133231; 0.181; 0.0141079	TCF7L1	0	intronic	0.132	6.0	1.0	0.0	0.0	5
12	2:217431561:A:T	rs60603116	2	217431561	1.1948e-12	217275448	217556573	11	9	2	rs60603116;rs4550645	1	rs60603116	vit_T1	rs60603116	RPL37A	ENSG00000197756	6168.0	RPL37A	0.00477076544447	1.39404793	11.0	6.647	1.1948e-12	Vertex-wise sulcal depth; Vertex-wise cortical surface area; Brain morphology (MOSTest); Cortical surface area; Brain shape (segment 86)	The genetic architecture of human cortical folding.; The genetic architecture of human cortical folding.; Boosting Schizophrenia Genetics by Utilizing Genetic Overlap With Brain Morphology.; Vertex-wise multivariate genome-wide association study identifies 780 unique genetic loci associated with cortical morphology.; Shared heritability of human face and brain shape.	34910505; 34910505; 35164939; 34560273; 33821002	9e-50; 1.0000000000000001e-23; 3e-19; 1e-17; 2e-15	14.83; 10.02	RPL37A	0	intronic	0.703	7.0	1.0	0.0	0.0	5
13	3:66027343:A:G	rs73833356	3	66027343	1.7403e-12	65902343	66174889	36	32	1	rs73833356	1	rs73833356	vit_T1	rs73833356	MAGI1	ENSG00000151276	9223.0	MAGI1	0.999615674506819	-0.022557074	1.0	4.226	1.7403e-12	Vertex-wise sulcal depth; Vertex-wise cortical surface area; Whole brain restricted directional diffusion (multivariate analysis); Whole brain restricted isotropic diffusion (multivariate analysis); Brain shape (segment 1)	The genetic architecture of human cortical folding.; The genetic architecture of human cortical folding.; Multivariate genome-wide association study on tissue-sensitive diffusion metrics highlights pathways that shape the human brain.; Multivariate genome-wide association study on tissue-sensitive diffusion metrics highlights pathways that shape the human brain.; Shared heritability of human face…	34910505; 34910505; 35505052; 35505052; 33821002	6.000000000000001e-107; 3e-41; 5.0000000000000004e-29; 6e-23; 9.000000000000001e-23	21.97; 13.44	MAGI1	2833	intergenic	4.226	5.0	1.0	0.0	0.0	5
14	3:71609007:A:G	rs62244889	3	71609007	3.42923e-10	71367037	71753287	92	84	1	rs62244889	1	rs62244889	vit_T1	rs62244889	FOXP1	ENSG00000114861	27086.0	FOXP1	0.999750735055125	-0.080650462	92.0	19.47	3.42923e-10	Educational attainment; Keratinocyte cancer (MTAG); Educational attainment (MTAG); Whole brain restricted isotropic diffusion (multivariate analysis); Educational attainment (years of education)	Polygenic prediction of educational attainment within and between families from genome-wide association analyses in 3 million individuals.; Combined analysis of keratinocyte cancers identifies novel genome-wide loci.; Gene discovery and polygenic prediction from a genome-wide association study of educational attainment in 1.1 million individuals.; Multivariate genome-wide association study on tis…	35361970; 31174203; 30038396; 35505052; 30038396	4e-55; 3e-34; 3.9999999999999997e-32; 2.0000000000000002e-28; 5e-27	0.0165461; 1.1111112; 0.0158; 0.0154	FOXP1	0	intronic	1.984		1.0	0.0	0.0	5
4; 15	3:177322867:C:T; 3:177323573:A:G	rs6766914; rs9873662	3	177322867; 177323573	1.42561e-12; 1.59975e-16	177146932	177467469	125; 123	95; 93	3; 3	rs6766914;rs6769466;rs552757; rs9873662;rs2133593;rs552757	1; 1	rs6766914; rs9873662	vit_T2; vit_T1	rs6766914; rs9873662										Vertex-wise sulcal depth; Vertex-wise cortical surface area; Vertex-wise cortical thickness; Whole brain restricted isotropic diffusion (multivariate analysis); Whole brain restricted directional diffusion (multivariate analysis); Vertex-wise sulcal depth; Vertex-wise cortical surface area; Vertex-wise cortical thickness; Whole brain restricted isotropic diffusion (multivariate analysis); Whole b…	The genetic architecture of human cortical folding.; The genetic architecture of human cortical folding.; The genetic architecture of human cortical folding.; Multivariate genome-wide association study on tissue-sensitive diffusion metrics highlights pathways that shape the human brain.; Multivariate genome-wide association study on tissue-sensitive diffusion metrics highlights pathways that shap…	34910505; 34910505; 34910505; 35505052; 35505052; 34910505; 34910505; 34910505; 35505052; 35505052	4e-123; 1.9999999999999999e-63; 1.0000000000000001e-49; 2.0000000000000002e-39; 6e-39; 4e-123; 1.9999999999999999e-63; 1.0000000000000001e-49; 2.0000000000000002e-39; 6e-39	23.6; 16.8; 14.81; 23.6; 16.8; 14.81	LINC00578; LINC00578	0; 0	ncRNA_intronic; ncRNA_intronic	0.712; 0.841	7.0; 6.0	0.0; 0.0	0.0; 0.0	0.0; 0.0	10
16; 5	3:190640121:G:T; 3:190641068:G:T	rs4624605; rs58531798	3	190640121; 190641068	2.7835800000000003e-23; 2.26265e-19	190466418	190803744	244; 255	183; 193	3; 2	rs4624605;rs113591830;rs12488471; rs58531798;rs13060312	2; 2	rs4624605;rs113591830; rs58531798;rs13060312	vit_T1; vit_T2	rs4624605; rs58531798	GMNC; GMNC	ENSG00000205835; ENSG00000205835	647309.0; 647309	GMNC; GMNC		1.10405959; 1.10405959	49.0; 58.0	12.4; 12.4	7.32463e-17; 2.68179e-14	Vertex-wise sulcal depth; Brain morphology (MOSTest); Vertex-wise cortical thickness; Brain morphology (MOSTest); Vertex-wise cortical surface area; Vertex-wise sulcal depth; Brain morphology (MOSTest); Vertex-wise cortical thickness; Brain morphology (MOSTest); Vertex-wise cortical surface area	The genetic architecture of human cortical folding.; Boosting Schizophrenia Genetics by Utilizing Genetic Overlap With Brain Morphology.; The genetic architecture of human cortical folding.; Understanding the genetic determinants of the brain with MOSTest.; The genetic architecture of human cortical folding.; The genetic architecture of human cortical folding.; Boosting Schizophrenia Genetics by …	34910505; 35164939; 34910505; 32665545; 34910505; 34910505; 35164939; 34910505; 32665545; 34910505	9.999999999999999e-129; 9.000000000000001e-105; 1e-77; 1.0000000000000001e-72; 1e-71; 9.999999999999999e-129; 9.000000000000001e-105; 1e-77; 1.0000000000000001e-72; 1e-71	24.13; 18.66; 17.9; 24.13; 18.66; 17.9	GMNC; GMNC	29902; 30849	intergenic; intergenic	1.575; 2.779	7.0; 7.0	0.0; 0.0	0.0; 0.0	0.0; 0.0	10
6	4:1003788:C:G	rs4569707	4	1003788	3.33412e-10	876742	1142236	8	5	1	rs4569707	1	rs4569707	vit_T2	rs4569707	IDUA; FGFRL1	ENSG00000127415; ENSG00000127418	3425; 53834	IDUA; FGFRL1	0.2910933509333908	0.211895548	15.0	10.17	3.33412e-10	Cortical surface area; Vertex-wise sulcal depth; Whole brain restricted isotropic diffusion (multivariate analysis); Vertex-wise cortical surface area; Cortical surface area	The genetic architecture of the human cerebral cortex.; The genetic architecture of human cortical folding.; Multivariate genome-wide association study on tissue-sensitive diffusion metrics highlights pathways that shape the human brain.; The genetic architecture of human cortical folding.; Vertex-wise multivariate genome-wide association study identifies 780 unique genetic loci associated with c…	32193296; 34910505; 35505052; 34910505; 34560273	1e-16; 2e-14; 1e-13; 8e-13; 5e-11	9.55114; 7.67; 7.16	FGFRL1	0	UTR5	0.614		1.0	0.0	0.0	5
17	4:4758190:A:G	rs4689932	4	4758190	2.42822e-10	4629859	4901618	35	24	1	rs4689932	1	rs4689932	vit_T1	rs4689932										Whole brain restricted directional diffusion (multivariate analysis); Whole brain restricted isotropic diffusion (multivariate analysis); Whole brain free water diffusion (multivariate analysis); Vertex-wise sulcal depth; IDP T1 FAST ROIs R cerebellum X	Multivariate genome-wide association study on tissue-sensitive diffusion metrics highlights pathways that shape the human brain.; Multivariate genome-wide association study on tissue-sensitive diffusion metrics highlights pathways that shape the human brain.; Multivariate genome-wide association study on tissue-sensitive diffusion metrics highlights pathways that shape the human brain.; The genet…	35505052; 35505052; 35505052; 34910505; 33875891	1.9999999999999998e-30; 8.000000000000001e-24; 2e-22; 9e-17; 2e-13	8.32; 0.077	STX18-AS1	45524	intergenic	0.043	7.0	0.0	0.0	0.0	5
18	4:81476986:C:T	rs112867328	4	81476986	3.37627e-10	81351986	81868390	4	4	1	rs112867328	1	rs112867328	vit_T1	rs112867328	C4orf22	ENSG00000197826	255119.0	C4orf22	1.12464982894466e-05	-0.223573604	4.0	19.11	3.37627e-10	Height; Appendicular lean mass; Heel bone mineral density	Leveraging Polygenic Functional Enrichment to Improve GWAS Power.; The genetic architecture of appendicular lean mass characterized by association analysis in the UK Biobank study.; Leveraging Polygenic Functional Enrichment to Improve GWAS Power.	30595370; 33097823; 30595370	3e-32; 1e-22; 2e-09	0.0723	C4orf22	0	intronic	7.442	5.0	1.0	0.0	0.0	3
19	4:103188709:C:T	rs13107325	4	103188709	1.00122e-12	102577364	103323083	10	10	2	rs13107325;rs34592089	1	rs13107325	vit_T1	rs13107325	BANK1; SLC39A8	ENSG00000153064; ENSG00000138821	55024.0; 64116.0	BANK1; SLC39A8	0.4457837395106335	-0.254000016	8.0	23.1	1.00122e-12	High density lipoprotein cholesterol levels; Vertex-wise cortical thickness; Brain morphology (MOSTest); Liver fibrosis and steatohepatitis severity (MRI cT1 measure); Whole brain restricted isotropic diffusion (multivariate analysis)	The power of genetic diversity in genome-wide association studies of lipids.; The genetic architecture of human cortical folding.; Boosting Schizophrenia Genetics by Utilizing Genetic Overlap With Brain Morphology.; Genome-wide and Mendelian randomisation studies of liver MRI yield insights into the pathogenesis of steatohepatitis.; Multivariate genome-wide association study on tissue-sensitive d…	34887591; 34910505; 35164939; 32247823; 35505052	1e-185; 6e-175; 6e-169; 1e-133; 6.000000000000001e-125	28.2; 0.544	SLC39A8	0	exonic	23.1	5.0	1.0	0.0	0.0	5
20	4:187377003:C:T	rs59570572	4	187377003	6.48623e-11	187241735	187515723	41	35	1	rs59570572	1	rs59570572	vit_T1	rs59570572	RP11-215A19.2	ENSG00000272297					41.0	12.83	6.48623e-11	Vertex-wise sulcal depth; Vertex-wise cortical thickness; Brain shape (segment 1); Whole brain restricted isotropic diffusion (multivariate analysis); Vertex-wise cortical surface area	The genetic architecture of human cortical folding.; The genetic architecture of human cortical folding.; Shared heritability of human face and brain shape.; Multivariate genome-wide association study on tissue-sensitive diffusion metrics highlights pathways that shape the human brain.; The genetic architecture of human cortical folding.	34910505; 34910505; 33821002; 35505052; 34910505	3e-139; 2e-61; 2.0000000000000003e-49; 2e-46; 3e-45	25.12; 16.55; 14.12	F11-AS1:RP11-215A19.2	0:0	ncRNA_intronic	0.366	7.0	1.0	0.0	0.0	5
7	5:72403453:C:T	rs7733340	5	72403453	9.20469e-11	71972351	72531660	64	52	1	rs7733340	1	rs7733340	vit_T2	rs7733340	TNPO1; FCHO2; TMEM171	ENSG00000083312; ENSG00000157107; ENSG00000157111	3842; 115548; 134285	TNPO1; FCHO2; TMEM171	0.6664009315069713	-2.317601104	55.0	11.43	1.7155e-10	Serum albumin levels; Aspartate aminotransferase levels; Aspartate aminotransferase levels; Albumin-globulin ratio; Non-albumin protein levels	A cross-population atlas of genetic associations for 220 human phenotypes.; A cross-population atlas of genetic associations for 220 human phenotypes.; Genome-wide association study of serum liver enzymes implicates diverse metabolic and liver pathology.; Genetic analysis of quantitative traits in the Japanese population links cell types to complex human diseases.; Genetic analysis of quantitativ…	34594039; 34594039; 33547301; 29403010; 29403010	5e-70; 4.9999999999999996e-57; 9e-37; 7.000000000000001e-29; 4.0000000000000003e-28	0.0366; 0.0304; 12.7; 0.05021; 0.04954	Y_RNA	7443	intergenic	6.776	6.0	0.0	0.0	0.0	5
21; 8	5:122653399:A:G; 5:122705737:A:C	rs13156484; rs6893539	5	122653399; 122705737	2.33331e-10; 1.90469e-11	122524342	122922235	113; 252	89; 206	1; 3	rs13156484; rs6893539;rs890928;rs890928	1; 1	rs13156484; rs6893539	vit_T1; vit_T2	rs13156484; rs6893539	CEP120; CEP120	ENSG00000168944; ENSG00000168944	153241.0; 153241	CEP120; CEP120	4.3447069250691596e-11; 4.3447069250691596e-11	-0.528864642; -0.528864642	107.0; 227.0	22.7; 22.7	3.50834e-10; 1.90469e-11	Educational attainment; Height; Diastolic blood pressure; Appendicular lean mass; Whole brain restricted directional diffusion (multivariate analysis); Educational attainment; Educational attainment; Height; Whole brain free water diffusion (multivariate analysis); Whole brain restricted isotropic diffusion (multivariate analysis)	Polygenic prediction of educational attainment within and between families from genome-wide association analyses in 3 million individuals.; Leveraging Polygenic Functional Enrichment to Improve GWAS Power.; High Blood Pressure and Intraocular Pressure: A Mendelian Randomization Study.; Genome-wide Associations Reveal Human-Mouse Genetic Convergence and Modifiers of Myogenesis, CPNE1 and STC2.; Mu…	35361970; 30595370; 35762941; 31761296; 35505052; 35361970; 35361970; 30595370; 35505052; 35505052	9e-73; 4.0000000000000006e-45; 1e-19; 8e-19; 2e-16; 9e-73; 7e-54; 4.0000000000000006e-45; 1e-27; 7.999999999999999e-26	0.0569996; 0.1895; 0.0611498; 0.0569996; 0.0524749	CEP120; CEP120	27179; 0	intergenic; intronic	0.855; 3.445	7.0; 7.0	0.0; 1.0	0.0; 0.0	0.0; 0.0	10
9; 22	5:171096729:C:G; 5:171128464:C:T	rs26341; rs6555969	5	171096729; 171128464	3.33665e-12; 1.66271e-10	170971729	171291686	5; 12	5; 7	1; 1	rs26341; rs6555969	1; 1	rs26341; rs6555969	vit_T2; vit_T1	rs26341; rs6555969										Brain shape (segment 151); Vertex-wise sulcal depth; Whole brain restricted isotropic diffusion (multivariate analysis); Vertex-wise cortical surface area; Whole brain restricted directional diffusion (multivariate analysis); Brain shape (segment 1)	Shared heritability of human face and brain shape.; The genetic architecture of human cortical folding.; Multivariate genome-wide association study on tissue-sensitive diffusion metrics highlights pathways that shape the human brain.; The genetic architecture of human cortical folding.; Multivariate genome-wide association study on tissue-sensitive diffusion metrics highlights pathways that shape…	33821002; 34910505; 35505052; 34910505; 35505052; 33821002	6e-14; 1e-96; 7.999999999999999e-32; 1e-27; 9.999999999999999e-26; 1e-18	20.85; 10.9	AC011410.1; AC011410.1	100804; 69069	intergenic; intergenic	0.515; 18.21	5.0; 5.0	0.0; 0.0	0.0; 0.0	0.0; 0.0	6
23	6:26184102:A:G	rs7766641	6	26184102	2.40345e-10	26039824	26387064	16	13	1	rs7766641	1	rs7766641	vit_T1	rs7766641	HIST1H1E; HIST1H2BD; HIST1H2BE; HIST1H4D; HIST1H3D; HIST1H2AD; HIST1H2BF; HIST1H4E; HIST1H2BG; HIST1H2AE; HIST1H3E; HIST1H1D; HIST1H4F; HIST1H4G; HIST1H3F; HIST1H2BH; HIST1H3G	ENSG00000168298; ENSG00000158373; ENSG00000197697; ENSG00000188987; ENSG00000197409; ENSG00000196866; ENSG00000197846; ENSG00000198518; ENSG00000187990; ENSG00000168274; ENSG00000196966; ENSG00000124575; ENSG00000198327; ENSG00000124578; ENSG00000256316; ENSG00000197459; ENSG00000256018	3008.0; 3017.0; 8347.0; 554313.0; 8968.0; 3013.0; 8335.0; 3007.0; 8369.0; 8345.0	HIST1H1E; HIST1H2BD; HIST1H2BE; HIST1H4D; HIST1H3D; HIST1H2AD; HIST1H2BF; HIST1H4E; HIST1H2BG; HIST1H2AE; HIST1H3E; HIST1H1D; HIST1H4F; HIST1H4G; HIST1H3F; HIST1H2BH; HIST1H3G	0.057807388565114	0.2779582880625	53.0	22.4	2.40345e-10	Height; Height; Body fat distribution (trunk fat ratio); Body fat distribution (leg fat ratio); Hip circumference adjusted for BMI	Defining the role of common variation in the genomic and biological architecture of adult human height.; Characterizing rare and low-frequency height-associated variants in the Japanese population.; Genome-wide association study of body fat distribution identifies adiposity loci and sex-specific genetic effects.; Genome-wide association study of body fat distribution identifies adiposity loci and…	25282103; 31562340; 30664634; 30664634; 34021172	5e-74; 2e-55; 1e-48; 2e-46; 5e-46	0.06; 0.060585186; 0.05275; 0.05168; 0.0464833	HIST1H2BE	0	exonic	22.4	4.0	1.0	0.0	0.0	5
24; 10	6:39526867:A:G; 6:39526895:C:T	rs1520; rs6458117	6	39526867; 39526895	7.09685e-14; 6.50892e-19	39339712	39760887	69; 78	64; 68	2; 3	rs1520;rs13208338; rs6458117;rs9471130;rs2466406	1; 1	rs1520; rs6458117	vit_T1; vit_T2	rs1520; rs6458117	KIF6; KIF6	ENSG00000164627; ENSG00000164627	221458.0; 221458	KIF6; KIF6	1.03952440427845e-16; 1.03952440427845e-16	5.668753748; 5.668753748	69.0; 78.0	21.3; 21.3	7.09685e-14; 6.50892e-19	Vertex-wise sulcal depth; Whole brain restricted directional diffusion (multivariate analysis); Whole brain restricted isotropic diffusion (multivariate analysis); Vertex-wise cortical thickness; Vertex-wise cortical surface area; Vertex-wise sulcal depth; Whole brain restricted directional diffusion (multivariate analysis); Whole brain restricted isotropic diffusion (multivariate analysis); Vert…	The genetic architecture of human cortical folding.; Multivariate genome-wide association study on tissue-sensitive diffusion metrics highlights pathways that shape the human brain.; Multivariate genome-wide association study on tissue-sensitive diffusion metrics highlights pathways that shape the human brain.; The genetic architecture of human cortical folding.; The genetic architecture of human…	34910505; 35505052; 35505052; 34910505; 34910505; 34910505; 35505052; 35505052; 34910505; 34910505	2.9999999999999997e-116; 5e-33; 9.999999999999999e-31; 4.0000000000000003e-28; 6e-27; 2.9999999999999997e-116; 5e-33; 9.999999999999999e-31; 4.0000000000000003e-28; 6e-27	22.92; 11.0; 10.74; 22.92; 11.0; 10.74	KIF6; KIF6	0; 0	intronic; intronic	21.3; 18.38	5.0; 6.0	1.0; 1.0	0.0; 0.0	0.0; 0.0	10
11; 25	6:44814892:A:G; 6:44961999:A:C	rs16869119; rs9885796	6	44814892; 44961999	1.3202e-11; 2.65413e-13	44553167	45529171	583; 209	499; 177	4; 3	rs16869119;rs191485704;rs34455867;rs73441184; rs9885796;rs77971312;rs73444688	3; 1	rs16869119;rs34455867;rs73441184; rs9885796	vit_T2; vit_T1	rs16869119; rs9885796	SUPT3H; RUNX2; SUPT3H; RUNX2	ENSG00000196284; ENSG00000124813; ENSG00000196284; ENSG00000124813	8464; 860; 8464.0; 860.0	SUPT3H; RUNX2; SUPT3H; RUNX2	0.4980344063136648; 0.4980344063136648	-0.7436555755; -0.7436555755	546.0; 220.0	19.96; 19.14	1.3202e-11; 2.65413e-13	Heel bone mineral density; Heel bone mineral density; Heel bone mineral density; Serum phosphate levels; Whole brain restricted directional diffusion (multivariate analysis); Heel bone mineral density; Heel bone mineral density; Heel bone mineral density; Height; Height	Leveraging Polygenic Functional Enrichment to Improve GWAS Power.; Identification of 613 new loci associated with heel bone mineral density and a polygenic risk score for bone mineral density, osteoporosis and fracture.; An atlas of genetic influences on osteoporosis in humans and mice.; Genetics of 35 blood and urine biomarkers in the UK Biobank.; Multivariate genome-wide association study on ti…	30595370; 30048462; 30598549; 33462484; 35505052; 30595370; 30048462; 30598549; 30595370; 34594039	4.0000000000000004e-126; 3.0000000000000004e-125; 1e-102; 3e-24; 4.0000000000000004e-24; 4.0000000000000004e-126; 3.0000000000000004e-125; 1e-102; 2.9999999999999997e-47; 5e-38	0.107672; 0.0910186; 0.0587; 0.107672; 0.0910186; 0.0186	SUPT3H; SUPT3H	0; 0	intronic; intronic	2.878; 7.378	6.0; 5.0	1.0; 1.0	0.0; 0.0	0.0; 0.0	10
12; 26	6:126755055:A:G; 6:126819699:G:T	rs9401882; rs4418209	6	126755055; 126819699	2.97008e-22; 4.2825e-15	126420036	127310802	320; 256	269; 209	5; 2	rs9401882;rs11759026;rs1337736;rs9718230;rs9401877; rs4418209;rs853974	1; 1	rs9401882; rs4418209	vit_T2; vit_T1	rs9401882; rs4418209	CENPW; CENPW	ENSG00000203760; ENSG00000203760	387103; 387103.0	CENPW; CENPW	0.50013630684411; 0.50013630684411	-0.442381075; -0.442381075	23.0; 17.0	10.05; 10.05	8.8371e-22; 2.03528e-14	Height; Vertex-wise sulcal depth; Appendicular lean mass; Height; Vertex-wise cortical surface area; Height; Vertex-wise sulcal depth; Appendicular lean mass; Height; Vertex-wise cortical surface area	Leveraging Polygenic Functional Enrichment to Improve GWAS Power.; The genetic architecture of human cortical folding.; The genetic architecture of appendicular lean mass characterized by association analysis in the UK Biobank study.; A cross-population atlas of genetic associations for 220 human phenotypes.; The genetic architecture of human cortical folding.; Leveraging Polygenic Functional Enr…	30595370; 34910505; 33097823; 34594039; 34910505; 30595370; 34910505; 33097823; 34594039; 34910505	3e-166; 8e-161; 9.999999999999999e-131; 2e-103; 3e-102; 3e-166; 8e-161; 9.999999999999999e-131; 2e-103; 3e-102	27.02; 0.0462; 0.0356; 21.47; 27.02; 0.0462; 0.0356; 21.47	MIR588; MIR588	50721; 13839	intergenic; intergenic	7.96; 3.827	6.0; 7.0	0.0; 0.0	0.0; 0.0	0.0; 0.0	10
27	6:133600591:C:G	rs12192839	6	133600591	1.97795e-12	133284492	133974790	287	254	2	rs12192839;rs6913726	2	rs12192839;rs6913726	vit_T1	rs12192839	EYA4	ENSG00000112319	2070.0	EYA4	0.126429148938264	0.279080041	107.0	19.05	1.97795e-12	Heel bone mineral density; Heel bone mineral density; Heel bone mineral density; Heel bone mineral density; Estimated glomerular filtration rate (creatinine)	Identification of 613 new loci associated with heel bone mineral density and a polygenic risk score for bone mineral density, osteoporosis and fracture.; Identification of 613 new loci associated with heel bone mineral density and a polygenic risk score for bone mineral density, osteoporosis and fracture.; Leveraging Polygenic Functional Enrichment to Improve GWAS Power.; An atlas of genetic infl…	30048462; 30048462; 30595370; 30598549; 35710981	2e-53; 1.0000000000000001e-49; 2e-40; 8e-33; 2.0000000000000002e-28	0.0308547; 0.0294909; 0.0221934; 11.081	EYA4	0	intronic	0.078	6.0	1.0	0.0	0.0	5
28	6:149387231:A:G	rs2486411	6	149387231	5.39993e-11	149185891	149552702	40	30	1	rs2486411	1	rs2486411	vit_T1	rs2486411	UST	ENSG00000111962	10090.0	UST	0.984203294606023	-0.711878088	31.0	15.43	5.39993e-11						UST	0	intronic	2.616		1.0	0.0	0.0	0
29	6:151901802:A:T	rs4869739	6	151901802	1.2992e-11	151722381	152037704	58	50	2	rs4869739;rs9479075	1	rs4869739	vit_T1	rs4869739	CCDC170	ENSG00000120262	80129.0	CCDC170	1.02112361613873e-19	1.380677467	58.0	13.89	1.2992e-11	Heel bone mineral density; Heel bone mineral density; Heel bone mineral density; Heel bone mineral density; Heel bone mineral density	Identification of 613 new loci associated with heel bone mineral density and a polygenic risk score for bone mineral density, osteoporosis and fracture.; Identification of 613 new loci associated with heel bone mineral density and a polygenic risk score for bone mineral density, osteoporosis and fracture.; Identification of 613 new loci associated with heel bone mineral density and a polygenic ri…	30048462; 30048462; 30048462; 30595370; 28869591	0.0; 1e-300; 1e-300; 1e-300; 4e-150	0.0883992; 0.0882182; 0.0946706	CCDC170	0	intronic	3.909	7.0	1.0	0.0	0.0	5
30; 13	7:2762126:C:T; 7:2819727:A:T	rs798546; rs7784066	7	2762126; 2819727	4.27984e-19; 1.33226e-16	2627152	3037929	228; 222	186; 180	5; 3	rs798546;rs798531;rs7790322;rs1639064;rs1183079; rs7784066;rs1713913;rs798512	1; 1	rs798546; rs7784066	vit_T1; vit_T2	rs798546; rs7784066	AMZ1; GNA12; AMZ1; GNA12	ENSG00000174945; ENSG00000146535; ENSG00000174945; ENSG00000146535	155185.0; 2768.0; 155185; 2768	AMZ1; GNA12; AMZ1; GNA12	0.4541349910779825; 0.4541349910779825	2.216605784; 2.216605784	290.0; 284.0	13.96; 13.96	4.27984e-19; 1.33226e-16	Height; Height; Height; Appendicular lean mass; Height; Height; Height; Height; Appendicular lean mass; Height	Leveraging Polygenic Functional Enrichment to Improve GWAS Power.; A cross-population atlas of genetic associations for 220 human phenotypes.; Defining the role of common variation in the genomic and biological architecture of adult human height.; The genetic architecture of appendicular lean mass characterized by association analysis in the UK Biobank study.; Characterizing rare and low-frequenc…	30595370; 34594039; 25282103; 33097823; 31562340; 30595370; 34594039; 25282103; 33097823; 31562340	2e-241; 1e-168; 2e-71; 3e-68; 2.9999999999999998e-55; 2e-241; 1e-168; 2e-71; 3e-68; 2.9999999999999998e-55	0.0391; 0.057; 0.0359; 0.051120285; 0.0391; 0.057; 0.0359; 0.051120285	AMZ1; GNA12	0; 0	intergenic; intronic	2.189; 0.259	6.0	1.0; 1.0	0.0; 0.0	0.0; 0.0	10
14; 31	7:19609643:A:G; 7:19613954:A:G	rs11767221; rs4472417	7	19609643; 19613954	2.7063e-33; 2.48744e-25	19399338	19901493	374; 357	324; 307	7; 6	rs6944632;rs4719563;rs9639333;rs2892936;rs11767221;rs2390151;rs6946520; rs4472417;rs2892936;rs4570042;rs4719563;rs6972245;rs13238033	3; 1	rs6944632;rs11767221;rs6946520; rs4472417	vit_T2; vit_T1	rs6944632; rs4472417	TWISTNB; TMEM196	ENSG00000105849; ENSG00000173452	221830; 256130	TWISTNB; TMEM196	0.1547197011314489	1.239250233	12.0	5.846	3.58628e-11	Vertex-wise sulcal depth; Whole brain restricted directional diffusion (multivariate analysis); Whole brain restricted isotropic diffusion (multivariate analysis); Vertex-wise cortical thickness; Whole brain free water diffusion (multivariate analysis); Vertex-wise sulcal depth; Whole brain restricted directional diffusion (multivariate analysis); Whole brain restricted isotropic diffusion (multi…	The genetic architecture of human cortical folding.; Multivariate genome-wide association study on tissue-sensitive diffusion metrics highlights pathways that shape the human brain.; Multivariate genome-wide association study on tissue-sensitive diffusion metrics highlights pathways that shape the human brain.; The genetic architecture of human cortical folding.; Multivariate genome-wide associat…	34910505; 35505052; 35505052; 34910505; 35505052; 34910505; 35505052; 35505052; 34910505; 35505052	3e-267; 2e-98; 4e-89; 6e-82; 1e-65; 3e-267; 2e-98; 4e-89; 6e-82; 1e-65	34.93; 19.18; 34.93; 19.18	AC007091.1; AC007091.1	0; 0	ncRNA_intronic; ncRNA_intronic	12.78; 7.35	4.0; 5.0	0.0; 0.0	0.0; 0.0	0.0; 0.0	10
15	7:33269089:C:G	rs7785463	7	33269089	6.54307e-12	33067837	33469750	39	34	1	rs7785463	1	rs7785463	vit_T2	rs7785463	BBS9	ENSG00000122507	27241	BBS9	6.37524189346244e-10	0.196307887	39.0	16.5	6.54307e-12	Vertex-wise sulcal depth; Vertex-wise cortical surface area; Whole brain restricted directional diffusion (multivariate analysis); Sagittal craniosynostosis; Whole brain restricted isotropic diffusion (multivariate analysis)	The genetic architecture of human cortical folding.; The genetic architecture of human cortical folding.; Multivariate genome-wide association study on tissue-sensitive diffusion metrics highlights pathways that shape the human brain.; A genome-wide association study identifies susceptibility loci for nonsyndromic sagittal craniosynostosis near BMP2 and within BBS9.; Multivariate genome-wide asso…	34910505; 34910505; 35505052; 23160099; 35505052	1e-107; 6e-35; 3e-23; 6e-20; 9e-18	22.05; 12.33; 4.17	BBS9	0	intronic	1.543	7.0	1.0	0.0	0.0	5
16; 32	7:38027816:A:G; 7:38064803:C:T	rs2598097; rs1721399	7	38027816; 38064803	3.08916e-10; 1.28345e-11	37902816	38257914	13; 45	10; 42	1; 1	rs2598097; rs1721399	1; 1	rs2598097; rs1721399	vit_T2; vit_T1	rs2598097; rs1721399	SFRP4; SFRP4	ENSG00000106483; ENSG00000106483	6424; 6424.0	SFRP4; SFRP4	4.45782556410063e-05; 4.45782556410063e-05	0.225244305; 0.225244305	11.0; 14.0	14.05; 11.97	3.08916e-10; 1.28345e-11	Heel bone mineral density; Heel bone mineral density; Heel bone mineral density; Heel bone mineral density; Whole brain restricted isotropic diffusion (multivariate analysis)	Identification of 613 new loci associated with heel bone mineral density and a polygenic risk score for bone mineral density, osteoporosis and fracture.; Identification of 153 new loci associated with heel bone mineral density and functional involvement of GPC6 in osteoporosis.; Identification of 153 new loci associated with heel bone mineral density and functional involvement of GPC6 in osteopor…	30048462; 28869591; 28869591; 28869591; 35505052	2e-194; 9.999999999999999e-64; 7e-38; 4.0000000000000004e-24; 8e-16	0.0777066; 0.069817; 0.0724659; 0.0631238	SFRP4; SFRP4	0; 0	intronic; intronic	1.142; 1.835		1.0; 1.0	0.0; 0.0	0.0; 0.0	5
17; 33	7:96212917:C:T; 7:96215107:C:T	rs62471424; rs4335059	7	96212917; 96215107	1.44999e-11; 3.33708e-13	96025233	96452942	144; 141	116; 114	1; 1	rs62471424; rs4335059	1; 1	rs62471424; rs4335059	vit_T2; vit_T1	rs62471424; rs4335059	SHFM1; SHFM1	ENSG00000127922; ENSG00000127922	7979; 7979.0	SHFM1; SHFM1	0.418592332178749; 0.418592332178749	-0.181498149; -0.181498149	144.0; 141.0	19.47; 19.47	1.44999e-11; 3.33708e-13	Vertex-wise sulcal depth; Vertex-wise cortical surface area; Vertex-wise cortical thickness; Whole brain restricted directional diffusion (multivariate analysis); Facial morphology (segment 54); Vertex-wise sulcal depth; Vertex-wise cortical surface area; Vertex-wise cortical thickness; Whole brain restricted directional diffusion (multivariate analysis); Facial morphology (segment 54)	The genetic architecture of human cortical folding.; The genetic architecture of human cortical folding.; The genetic architecture of human cortical folding.; Multivariate genome-wide association study on tissue-sensitive diffusion metrics highlights pathways that shape the human brain.; Insights into the genetic architecture of the human face.; The genetic architecture of human cortical folding.…	34910505; 34910505; 34910505; 35505052; 33288918; 34910505; 34910505; 34910505; 35505052; 33288918	5e-324; 6e-153; 4e-93; 3e-82; 8e-74; 5e-324; 6e-153; 4e-93; 3e-82; 8e-74	26.35; 20.47; 26.35; 20.47	SHFM1; SHFM1	0; 0	intergenic; intergenic	0.965; 2.536	7.0; 6.0	1.0; 1.0	0.0; 0.0	0.0; 0.0	10
34	7:101079228:C:T	rs12532276	7	101079228	2.26553e-11	100918458	101219859	89	64	2	rs12532276;rs10223928	1	rs12532276	vit_T1	rs12532276										Whole brain restricted isotropic diffusion (multivariate analysis); Whole brain free water diffusion (multivariate analysis); Whole brain restricted directional diffusion (multivariate analysis); Corneal resistance factor (MTAG); Central corneal thickness (MTAG)	Multivariate genome-wide association study on tissue-sensitive diffusion metrics highlights pathways that shape the human brain.; Multivariate genome-wide association study on tissue-sensitive diffusion metrics highlights pathways that shape the human brain.; Multivariate genome-wide association study on tissue-sensitive diffusion metrics highlights pathways that shape the human brain.; Associati…	35505052; 35505052; 35505052; 35446358; 35446358	3e-28; 2e-20; 7e-19; 4e-16; 6e-12	0.03714; 1.74577	COL26A1	0	intronic	4.986	5.0	0.0	0.0	0.0	5
18; 35	7:120974765:A:G; 7:120994169:G:T	rs3801387; rs3801383	7	120974765; 120994169	5.2855399999999995e-50; 3.94687e-47	120578161	121165783	258; 353	222; 302	17; 15	rs73433974;rs77345085;rs798908;rs76042375;rs2908004;rs2110279;rs798914;rs798906;rs798903;rs798902;rs798901;rs6961083;rs2908007;rs17284876;rs17143281;rs17509082;rs3801387; rs2110279;rs798908;rs2908004;rs67991850;rs4731006;rs4731009;rs2536150;rs2707521;rs3801383;rs1541509;rs17509082;rs2707520;rs76042375;rs2536196;rs2952565	4; 4	rs73433974;rs798914;rs17143281;rs3801387; rs2110279;rs67991850;rs3801383;rs2952565	vit_T2; vit_T1	rs73433974; rs2110279	CPED1; WNT16; FAM3C; CPED1; WNT16; FAM3C	ENSG00000106034; ENSG00000002745; ENSG00000196937; ENSG00000106034; ENSG00000002745; ENSG00000196937	79974; 51384; 10447; 79974.0; 51384.0; 10447.0	CPED1; WNT16; FAM3C; CPED1; WNT16; FAM3C	0.0004220777688709; 0.0004220777688709	-0.7898043156666666; -0.7898043156666666	255.0; 350.0	23.4; 23.4	5.28554e-50; 3.94687e-47	Heel bone mineral density; Heel bone mineral density; Heel bone mineral density; Heel bone mineral density; Heel bone mineral density; Heel bone mineral density; Heel bone mineral density; Heel bone mineral density; Heel bone mineral density; Heel bone mineral density	Identification of 613 new loci associated with heel bone mineral density and a polygenic risk score for bone mineral density, osteoporosis and fracture.; Identification of 153 new loci associated with heel bone mineral density and functional involvement of GPC6 in osteoporosis.; Leveraging Polygenic Functional Enrichment to Improve GWAS Power.; Identification of 613 new loci associated with heel …	30048462; 28869591; 30595370; 30048462; 31453325; 30048462; 28869591; 31453325; 30048462; 30048462	0.0; 5e-324; 1e-300; 1e-300; 1e-300; 0.0; 5e-324; 1e-300; 1e-300; 1e-300	0.17; 0.179756; 0.17; 0.182655; 0.179756	CPED1; CPED1	0; 0	intronic; intronic	1.133; 1.986	5.0; 7.0	1.0; 1.0	0.0; 0.0	0.0; 0.0	10
36	7:151498679:C:T	rs4128399	7	151498679	1.01412e-14	151367906	151629460	8	7	2	rs4128399;rs13224758	1	rs4128399	vit_T1	rs4128399	PRKAG2	ENSG00000106617	51422.0	PRKAG2	0.977557428638321	1.331830924	8.0	8.138	1.01412e-14	Whole brain restricted isotropic diffusion (multivariate analysis); Whole brain free water diffusion (multivariate analysis); Whole brain restricted directional diffusion (multivariate analysis); Vertex-wise sulcal depth; Vertex-wise cortical thickness	Multivariate genome-wide association study on tissue-sensitive diffusion metrics highlights pathways that shape the human brain.; Multivariate genome-wide association study on tissue-sensitive diffusion metrics highlights pathways that shape the human brain.; Multivariate genome-wide association study on tissue-sensitive diffusion metrics highlights pathways that shape the human brain.; The genet…	35505052; 35505052; 35505052; 34910505; 34910505	2e-69; 2e-59; 1e-41; 1e-35; 4e-31	12.48; 11.6	PRKAG2	0	intronic	0.584	7.0	1.0	0.0	0.0	5
37	8:108414618:C:T	rs1283690	8	108414618	2.03818e-11	108268799	108546948	38	31	1	rs1283690	1	rs1283690	vit_T1	rs1283690	ANGPT1	ENSG00000154188	284.0	ANGPT1	0.993331323979084	-0.174375587	38.0	18.42	2.03818e-11	Vertex-wise sulcal depth; Whole brain restricted isotropic diffusion (multivariate analysis); Whole brain restricted directional diffusion (multivariate analysis); Whole brain free water diffusion (multivariate analysis); Vertex-wise cortical surface area	The genetic architecture of human cortical folding.; Multivariate genome-wide association study on tissue-sensitive diffusion metrics highlights pathways that shape the human brain.; Multivariate genome-wide association study on tissue-sensitive diffusion metrics highlights pathways that shape the human brain.; Multivariate genome-wide association study on tissue-sensitive diffusion metrics highl…	34910505; 35505052; 35505052; 35505052; 34910505	6e-51; 1e-38; 9.999999999999999e-31; 3e-30; 3e-27	15.01; 10.81	ANGPT1	0	intronic	4.228		1.0	0.0	0.0	5
19	8:119960547:A:C	rs3102732	8	119960547	3.20529e-11	119779557	120188543	106	90	1	rs3102732	1	rs3102732	vit_T2	rs3102732	TNFRSF11B; COLEC10	ENSG00000164761; ENSG00000184374	4982; 10584	TNFRSF11B; COLEC10	0.185383087500096	-0.044626199	93.0	17.74	3.20529e-11	Liver enzyme levels (alkaline phosphatase); Serum alkaline phosphatase levels; Serum alkaline phosphatase levels; Lumbar spine bone mineral density; Total body bone mineral density	Genetic analysis in European ancestry individuals identifies 517 loci associated with liver enzymes.; A cross-population atlas of genetic associations for 220 human phenotypes.; Genome-wide association study of serum liver enzymes implicates diverse metabolic and liver pathology.; Genome-wide meta-analysis identifies 56 bone mineral density loci and reveals 14 loci associated with risk of fractur…	33972514; 34594039; 33547301; 22504420; 29304378	3.9999999999999997e-128; 6e-113; 9.999999999999999e-85; 3e-39; 4.999999999999999e-32	0.00543394; 0.0463; 19.5; 0.08; 0.074	TNFRSF11B	0	intronic	14.55	5.0	1.0	0.0	0.0	5
20	8:120456195:A:T	rs199906318	8	120456195	5.91265e-11	120267313	120601553	144	138	1	rs199906318	1	rs199906318	vit_T2	rs199906318	NOV	ENSG00000136999	4856	NOV	0.113896789353618	1.957115733	92.0	17.8	1.22578e-10	Pulse pressure; Pulse pressure; Height; Pulse pressure x alcohol consumption interaction (2df test); Pulse pressure	High Blood Pressure and Intraocular Pressure: A Mendelian Randomization Study.; Trans-ethnic association study of blood pressure determinants in over 750,000 individuals.; Leveraging Polygenic Functional Enrichment to Improve GWAS Power.; Novel genetic associations for blood pressure identified via gene-alcohol interaction in up to 570K individuals across multiple ancestries.; Genome-wide associa…	35762941; 30578418; 30595370; 29912962; 27841878	5e-56; 5e-55; 1e-41; 1.0000000000000001e-39; 3e-38	0.4737; 0.4663; 0.37	RP11-775B15.2	0	ncRNA_intronic	3.525	5.0	0.0	0.0	0.0	5
21; 38	9:16681993:C:G; 9:16694836:A:G	rs3904778; rs10733314	9	16681993; 16694836	4.21764e-16; 3.17617e-14	16555138	16835122	61; 61	49; 49	1; 1	rs3904778; rs10733314	1; 1	rs3904778; rs10733314	vit_T2; vit_T1	rs3904778; rs10733314	BNC2; BNC2	ENSG00000173068; ENSG00000173068	54796; 54796.0	BNC2; BNC2	0.999465645265111; 0.999465645265111	0.551639085; 0.551639085	61.0; 61.0	20.1; 20.1	4.21764e-16; 3.17617e-14	Heel bone mineral density; Heel bone mineral density; Heel bone mineral density; Adolescent idiopathic scoliosis; Vertex-wise sulcal depth; Heel bone mineral density; Heel bone mineral density; Heel bone mineral density; Adolescent idiopathic scoliosis; Vertex-wise sulcal depth	Leveraging Polygenic Functional Enrichment to Improve GWAS Power.; Identification of 613 new loci associated with heel bone mineral density and a polygenic risk score for bone mineral density, osteoporosis and fracture.; An atlas of genetic influences on osteoporosis in humans and mice.; Genome-wide association study identifies 14 previously unreported susceptibility loci for adolescent idiopathi…	30595370; 30048462; 30598549; 31417091; 34910505; 30595370; 30048462; 30598549; 31417091; 34910505	3.0000000000000003e-31; 3e-29; 6e-23; 2e-17; 5e-16; 3.0000000000000003e-31; 3e-29; 6e-23; 2e-17; 5e-16	0.0290091; 0.0231928; 1.2; 8.1; 0.0290091; 0.0231928; 1.2; 8.1	BNC2; BNC2	0; 0	intronic; intronic	1.284; 15.25	7.0; 7.0	1.0; 1.0	0.0; 0.0	0.0; 0.0	10
39	9:113665419:A:G	rs1409682	9	113665419	5.65474e-11	113523136	113864302	73	60	1	rs1409682	1	rs1409682	vit_T1	rs1409682	LPAR1	ENSG00000198121	1902.0	LPAR1	0.0014189810556421	0.680565103	73.0	16.43	5.65474e-11	Whole brain free water diffusion (multivariate analysis); Vertex-wise cortical thickness; Vertex-wise sulcal depth; Whole brain restricted isotropic diffusion (multivariate analysis); Central corneal thickness	Multivariate genome-wide association study on tissue-sensitive diffusion metrics highlights pathways that shape the human brain.; The genetic architecture of human cortical folding.; The genetic architecture of human cortical folding.; Multivariate genome-wide association study on tissue-sensitive diffusion metrics highlights pathways that shape the human brain.; A multiethnic genome-wide analysi…	35505052; 34910505; 34910505; 35505052; 32528159	9e-47; 3e-32; 1.0000000000000001e-23; 1e-22; 3e-21	11.82; 10.04; 2.7	LPAR1	0	intronic	3.386		1.0	0.0	0.0	5
40; 22	9:119061396:A:G; 9:119061396:A:G	rs72754248; rs72754248	9	119061396; 119061396	5.60374e-14; 1.935e-13	118792007	119223519	42; 41	33; 33	2; 2	rs3789281;rs72754248; rs449807;rs72754248	2; 2	rs3789281;rs72754248; rs449807;rs72754248	vit_T1; vit_T2	rs3789281; rs449807	PAPPA; PAPPA	ENSG00000182752; ENSG00000182752	5069.0; 5069	PAPPA; PAPPA	0.967751416645701; 0.967751416645701	0.117429697; 0.117429697	42.0; 41.0	20.6; 20.6	5.60374e-14; 1.935e-13	Total cerebellar volume; Brain morphology (MOSTest); Subcortical volume (MOSTest); Brain region volumes; Brain region volumes; Total cerebellar volume; Brain morphology (MOSTest); Subcortical volume (MOSTest); Brain region volumes; Brain region volumes	Genome-wide association study of cerebellar volume provides insights into heritable mechanisms underlying brain development and mental health.; Boosting Schizophrenia Genetics by Utilizing Genetic Overlap With Brain Morphology.; Understanding the genetic determinants of the brain with MOSTest.; Genome-wide association analysis of 19,629 individuals identifies variants influencing regional brain v…	35842455; 35164939; 32665545; 31676860; 31676860; 35842455; 35164939; 32665545; 31676860; 31676860	5e-51; 5e-47; 3e-46; 9.999999999999999e-43; 7e-41; 5e-51; 5e-47; 3e-46; 9.999999999999999e-43; 7e-41	2574.39; 2574.39	PAPPA; PAPPA	0; 0	intronic; intronic	4.835; 8.702	4.0; 5.0	1.0; 1.0	0.0; 0.0	0.0; 0.0	10
41	9:126353327:C:T	rs10760293	9	126353327	2.97765e-10	126181184	126573277	78	67	1	rs10760293	1	rs10760293	vit_T1	rs10760293	DENND1A	ENSG00000119522	57706.0	DENND1A	0.904475401385969	-0.055164614	78.0	21.2	2.97765e-10	Brain shape (segment 15); Leisure sedentary behaviour (computer use); Waist circumference adjusted for body mass index; Self-reported risk-taking behaviour; Self-reported risk-taking behaviour	Shared heritability of human face and brain shape.; Genome-wide association studies and Mendelian randomization analyses for leisure sedentary behaviours.; Shared Genetic and Experimental Links between Obesity-Related Traits and Asthma Subtypes in UK Biobank.; Genome-wide association study for risk taking propensity indicates shared pathways with body mass index.; Genetics of self-reported risk-t…	33821002; 32317632; 31669095; 30271922; 30181555	5e-12; 2e-10; 9e-09; 2e-08; 2e-07	0.0149904; 1.026; 0.032	DENND1A	0	intronic	0.984	6.0	1.0	0.0	0.0	5
42	10:21873295:G:T	rs7905967	10	21873295	2.03711e-14	21641969	22413133	182	151	1	rs7905967	1	rs7905967	vit_T1	rs7905967	CASC10; SKIDA1; MLLT10; DNAJC1	ENSG00000204682; ENSG00000180592; ENSG00000078403; ENSG00000136770	399726.0; 387640.0; 8028.0; 64215.0	CASC10; SKIDA1; MLLT10; DNAJC1	0.3398795250653848	-1.199032017666667	188.0	22.0	2.03711e-14	Vertex-wise sulcal depth; Vertex-wise cortical thickness; Vertex-wise cortical surface area; Brain morphology (MOSTest); Whole brain restricted isotropic diffusion (multivariate analysis)	The genetic architecture of human cortical folding.; The genetic architecture of human cortical folding.; The genetic architecture of human cortical folding.; Boosting Schizophrenia Genetics by Utilizing Genetic Overlap With Brain Morphology.; Multivariate genome-wide association study on tissue-sensitive diffusion metrics highlights pathways that shape the human brain.	34910505; 34910505; 34910505; 35164939; 35505052	1.0000000000000001e-82; 2e-52; 2e-48; 2e-36; 4e-36	19.25; 15.23; 14.64	MLLT10	0	intronic	0.104	7.0	1.0	0.0	0.0	5
23	10:27894442:G:T	rs7088929	10	27894442	2.51534e-10	27740221	28019610	38	29	2	rs7088929;rs10764720	1	rs7088929	vit_T2	rs7088929										Heel bone mineral density; Heel bone mineral density; Heel bone mineral density; Heel bone mineral density; Heel bone mineral density	Leveraging Polygenic Functional Enrichment to Improve GWAS Power.; Identification of 613 new loci associated with heel bone mineral density and a polygenic risk score for bone mineral density, osteoporosis and fracture.; Identification of 613 new loci associated with heel bone mineral density and a polygenic risk score for bone mineral density, osteoporosis and fracture.; An atlas of genetic infl…	30595370; 30048462; 30048462; 30598549; 28869591	6e-45; 1e-44; 5.999999999999999e-44; 1e-41; 4e-15	0.028236; 0.0279937; 0.0257026; 0.0259016	RAB18	63298	intergenic	6.775	5.0	0.0	0.0	0.0	5
43; 24	10:50290496:A:G; 10:50372347:C:T	rs58154726; rs2003044	10	50290496; 50372347	3.46879e-11; 2.32958e-11	50128187	50506232	139; 160	124; 142	2; 2	rs58154726;rs4838367; rs2003044;rs6537497	1; 1	rs58154726; rs2003044	vit_T1; vit_T2	rs58154726; rs2003044	VSTM4; FAM170B; C10orf128; VSTM4; FAM170B; C10orf128	ENSG00000165633; ENSG00000172538; ENSG00000204161; ENSG00000165633; ENSG00000172538; ENSG00000204161	196740.0; 170370.0; 170371.0; 196740; 170370; 170371	VSTM4; FAM170B; C10orf128; VSTM4; FAM170B; C10orf128	0.1002640520196455; 0.1002640520196455	0.6942655950000001; 0.6942655950000001	139.0; 160.0	15.06; 19.14	3.46879e-11; 2.32958e-11	Vertex-wise sulcal depth; Whole brain restricted isotropic diffusion (multivariate analysis); Vertex-wise cortical thickness; Whole brain free water diffusion (multivariate analysis); Whole brain restricted directional diffusion (multivariate analysis); Vertex-wise sulcal depth; Whole brain restricted isotropic diffusion (multivariate analysis); Vertex-wise cortical thickness; Lymphocyte count; W…	The genetic architecture of human cortical folding.; Multivariate genome-wide association study on tissue-sensitive diffusion metrics highlights pathways that shape the human brain.; The genetic architecture of human cortical folding.; Multivariate genome-wide association study on tissue-sensitive diffusion metrics highlights pathways that shape the human brain.; Multivariate genome-wide associat…	34910505; 35505052; 34910505; 35505052; 35505052; 34910505; 35505052; 34910505; 34594039; 35505052	6e-80; 2.0000000000000003e-34; 5e-33; 1.9999999999999998e-25; 1.0000000000000001e-24; 6e-80; 2.0000000000000003e-34; 5e-33; 1.9999999999999998e-30; 1.9999999999999998e-25	18.93; 11.97; 18.93; 11.97; 0.0323	VSTM4; C10orf128	0; 0	intronic; intronic	1.087; 4.826	6.0	1.0; 1.0	0.0; 0.0	0.0; 0.0	10
25; 44	10:94940825:C:G; 10:94962714:G:T	rs11187314; rs7894625	10	94940825; 94962714	2.83472e-15; 1.08488e-16	94634464	95192067	176; 219	147; 189	6; 9	rs10882156;rs12248367;rs11187314;rs4326721;rs7070947;rs4918429; rs10882139;rs10882156;rs4917613;rs7894625;rs7084981;rs12767937;rs12775400;rs2797576;rs72815155	2; 3	rs10882156;rs11187314; rs10882139;rs10882156;rs7894625	vit_T2; vit_T1	rs10882156; rs10882139	EXOC6; CYP26C1; CYP26A1; MYOF	ENSG00000138190; ENSG00000187553; ENSG00000095596; ENSG00000138119	54536.0; 340665.0; 1592.0; 26509.0	EXOC6; CYP26C1; CYP26A1; MYOF	0.0127954917682537	-0.07864434725	49.0	21.6	3.75055e-11	Whole brain restricted directional diffusion (multivariate analysis); Vertical cup-disc ratio (multi-trait analysis); Whole brain restricted isotropic diffusion (multivariate analysis); Vertical cup-disc ratio; Lung function (FVC); Intraocular pressure; Corneal resistance factor (MTAG); Central corneal thickness (MTAG); Sex hormone-binding globulin levels adjusted for BMI; Sex hormone-binding glo…	Multivariate genome-wide association study on tissue-sensitive diffusion metrics highlights pathways that shape the human brain.; Multitrait analysis of glaucoma identifies new risk loci and enables polygenic prediction of disease susceptibility and progression.; Multivariate genome-wide association study on tissue-sensitive diffusion metrics highlights pathways that shape the human brain.; Large…	35505052; 31959993; 35505052; 34077760; 30595370; 29617998; 35446358; 35446358; 32042192; 32042192	7e-18; 9e-16; 1e-15; 5e-15; 7e-15; 1e-36; 2e-35; 3e-23; 1e-22; 7e-19	0.007; 0.0332; 0.1736; 0.049147; 2.37009; 0.0105641; 0.0101624	NIP7P1; EXOC6	41817; 0	intergenic; intronic	3.702; 3.974	6.0; 6.0	0.0; 1.0	0.0; 0.0	0.0; 0.0	10
45	10:99902698:A:C	rs10786393	10	99902698	2.91282e-11	99738549	100152988	43	39	1	rs10786393	1	rs10786393	vit_T1	rs10786393	R3HCC1L; LOXL4	ENSG00000166024; ENSG00000138131	27291.0; 84171.0	R3HCC1L; LOXL4	1.440675186344185e-05	0.0507126845	47.0	17.68	2.91282e-11	Height; Height; Pulse pressure; Body mass index; Carpal tunnel syndrome	Leveraging Polygenic Functional Enrichment to Improve GWAS Power.; A cross-population atlas of genetic associations for 220 human phenotypes.; Discovery of rare variants associated with blood pressure regulation through meta-analysis of 1.3 million individuals.; Protein-altering variants associated with body mass index implicate pathways that control energy intake and expenditure in obesity.; A c…	30595370; 34594039; 33230300; 29273807; 34594039	5e-22; 5e-19; 2e-16; 8e-16; 9e-10	0.0119; 0.13678241; 0.0148; 0.0673	R3HCC1L	0	intronic	2.362	6.0	1.0	0.0	0.0	5
46; 26	11:10674044:C:G; 11:10674044:C:G	rs4910165; rs4910165	11	10674044; 10674044	1.72747e-12; 5.7126e-16	10530021	10824751	32; 36	32; 35	2; 3	rs4910165;rs10770131; rs4910165;rs10770131;rs1035691	1; 1	rs4910165; rs4910165	vit_T1; vit_T2	rs4910165; rs4910165	MRVI1; MRVI1	ENSG00000072952; ENSG00000072952	10335.0; 10335	MRVI1; MRVI1	0.0018412152471268; 0.0018412152471268	-0.670039603; -0.670039603	32.0; 36.0	17.09; 17.09	1.72747e-12; 5.7126e-16	Mean platelet volume; Mean platelet volume; Mean platelet volume; Migraine and/or diastolic blood pressure; Platelet count; Mean platelet volume; Mean platelet volume; Mean platelet volume; Migraine and/or diastolic blood pressure; Platelet count	Trans-ethnic and Ancestry-Specific Blood-Cell Genetics in 746,667 Individuals from 5 Global Populations.; Trans-ethnic and Ancestry-Specific Blood-Cell Genetics in 746,667 Individuals from 5 Global Populations.; The Polygenic and Monogenic Basis of Blood Traits and Diseases.; A genome-wide cross-phenotype meta-analysis of the association of blood pressure with migraine.; Trans-ethnic and Ancestry…	32888493; 32888493; 32888494; 32632093; 32888493; 32888493; 32888493; 32888494; 32632093; 32888493	1e-53; 4e-52; 3e-33; 5e-31; 4e-27; 1e-53; 4e-52; 3e-33; 5e-31; 4e-27	0.031866; 0.029178174; 0.021271; 0.031866; 0.029178174; 0.021271	MRVI1; MRVI1	0; 0	intronic; intronic	2.047; 2.047	7.0; 7.0	1.0; 1.0	0.0; 0.0	0.0; 0.0	10
47	11:27502675:C:G	rs7938467	11	27502675	1.40657e-11	27340591	27754646	50	42	1	rs7938467	1	rs7938467	vit_T1	rs7938467	LGR4; LIN7C	ENSG00000205213; ENSG00000148943	55366.0; 55327.0	LGR4; LIN7C	0.5120889373852929	-0.199884449	4.0	17.35	1.40657e-11	Bone mineral density (paediatric, skull); aparc-pial rh area TotalSurface; aseg global volume SupraTentorial; aseg global volume BrainSeg; aseg global volume-ratio BrainSegVol-to-eTIV	Phenotypic dissection of bone mineral density reveals skeletal site specificity and facilitates the identification of novel loci in the genetic regulation of bone mass attainment.; An expanded set of genome-wide association studies of brain imaging phenotypes in UK Biobank.; An expanded set of genome-wide association studies of brain imaging phenotypes in UK Biobank.; An expanded set of genome-wi…	24945404; 33875891; 33875891; 33875891; 33875891	2e-17; 1e-16; 1e-16; 5e-16; 3e-15	0.127; 0.081; 0.081; 0.08; 0.078	RP11-159H22.2	0	ncRNA_intronic	2.27	4.0	1.0	0.0	0.0	5
48	11:95308854:A:T	rs11021221	11	95308854	1.01213e-10	95149265	95452375	32	27	1	rs11021221	1	rs11021221	vit_T1	rs11021221										Immature fraction of reticulocytes; High light scatter reticulocyte percentage of red cells; High light scatter reticulocyte count; Reticulocyte fraction of red cells; Reticulocyte count	The Polygenic and Monogenic Basis of Blood Traits and Diseases.; The Polygenic and Monogenic Basis of Blood Traits and Diseases.; The Polygenic and Monogenic Basis of Blood Traits and Diseases.; The Polygenic and Monogenic Basis of Blood Traits and Diseases.; The Polygenic and Monogenic Basis of Blood Traits and Diseases.	32888494; 32888494; 32888494; 32888494; 32888494	4e-36; 7.0000000000000006e-34; 7e-33; 2e-21; 1e-19	0.03744853; 0.03600214; 0.035449665; 0.028354865; 0.026974995	RP11-338H14.1	78136	intergenic	16.76	5.0	0.0	0.0	0.0	5
49	11:100915713:C:T	rs61890632	11	100915713	3.27475e-10	100748355	101277004	176	150	1	rs61890632	1	rs61890632	vit_T1	rs61890632	TMEM133; PGR	ENSG00000170647; ENSG00000082175	83935.0; 5241.0	TMEM133; PGR	0.4550498770171665	0.2014006135	107.0	17.86	3.27475e-10	Vertex-wise sulcal depth; Diastolic blood pressure	The genetic architecture of human cortical folding.; Genetic analysis of over 1 million people identifies 535 new loci associated with blood pressure traits.	34910505; 30224653	2e-10; 6e-09	6.35; 0.1162	PGR	0	intronic	2.169	7.0	1.0	0.0	0.0	2
50; 27	11:110950448:A:C; 11:111056158:A:G	rs7941114; rs58066679	11	110950448; 111056158	1.49058e-10; 2.10013e-12	110820939	111208786	59; 67	54; 60	1; 4	rs7941114; rs7941114;rs58066679;rs61900578;rs34077344	1; 2	rs7941114; rs7941114;rs58066679	vit_T1; vit_T2	rs7941114; rs7941114										Vertex-wise sulcal depth; Vertex-wise cortical thickness; Whole brain restricted isotropic diffusion (multivariate analysis); Whole brain restricted directional diffusion (multivariate analysis); Whole brain free water diffusion (multivariate analysis); Vertex-wise sulcal depth; Vertex-wise cortical thickness; Vertex-wise cortical surface area; Whole brain restricted isotropic diffusion (multivar…	The genetic architecture of human cortical folding.; The genetic architecture of human cortical folding.; Multivariate genome-wide association study on tissue-sensitive diffusion metrics highlights pathways that shape the human brain.; Multivariate genome-wide association study on tissue-sensitive diffusion metrics highlights pathways that shape the human brain.; Multivariate genome-wide associat…	34910505; 34910505; 35505052; 35505052; 35505052; 34910505; 34910505; 34910505; 35505052; 35505052	2e-121; 1.9999999999999998e-54; 4e-38; 3e-33; 9e-28; 2e-121; 1.9999999999999998e-54; 2e-47; 4e-38; 3e-33	23.44; 15.53; 23.44; 15.53; 14.48	RP11-89C3.3; RP11-89C3.3	10145; 10145	intergenic; intergenic	2.429; 2.429	7.0; 7.0	0.0; 0.0	0.0; 0.0	0.0; 0.0	10
28	11:130282078:C:T	rs2875238	11	130282078	4.47578e-11	130141117	130407079	10	10	1	rs2875238	1	rs2875238	vit_T2	rs2875238	ADAMTS8	ENSG00000134917	11095	ADAMTS8	1.0556522196896e-08	-0.530041347	10.0	16.91	4.47578e-11	Pulse pressure; Pulse pressure; Pulse pressure; Pulse pressure; Pulse pressure	A cross-population atlas of genetic associations for 220 human phenotypes.; Genome-wide association analyses using electronic health records identify new loci influencing blood pressure variation.; Trans-ethnic association study of blood pressure determinants in over 750,000 individuals.; High Blood Pressure and Intraocular Pressure: A Mendelian Randomization Study.; Genome-wide association analy…	34594039; 27841878; 30578418; 35762941; 27841878	5e-85; 8e-69; 5e-67; 1.9999999999999999e-63; 5.999999999999999e-62	0.0408; 0.478; 0.4622; 0.4386; 0.443	ADAMTS8	0	intronic	3.343	5.0	1.0	0.0	0.0	5
29; 51	12:28246901:C:G; 12:28348136:A:G	rs11049337; rs61920242	12	28246901; 28348136	3.67424e-21; 5.155789999999999e-20	28060168	28865650	1001; 972	843; 820	12; 20	rs6487660;rs1479488;rs11049337;rs1813000;rs11049350;rs7305790;rs11049415;rs61920563;rs4931080;rs1511548;rs6487655;rs10843083; rs10843074;rs11049310;rs722885;rs11049329;rs61920200;rs11049431;rs10843072;rs6487660;rs10843088;rs11049327;rs405394;rs61920242;rs7316831;rs2348418;rs11049713;rs926150;rs11834117;rs11049353;rs75351141;rs61920203	2; 4	rs6487660;rs11049337; rs10843074;rs6487660;rs61920242;rs75351141	vit_T2; vit_T1	rs6487660; rs10843074	CCDC91; CCDC91	ENSG00000123106; ENSG00000123106	55297; 55297.0	CCDC91; CCDC91	3.15157303302004e-05; 3.15157303302004e-05	0.458621643; 0.458621643	865.0; 817.0	19.67; 18.93	1.04371e-18; 5.155789999999999e-20	Height; Vertex-wise sulcal depth; Lung function (FVC); Lung function (FVC); Whole brain restricted isotropic diffusion (multivariate analysis); Height; Vertex-wise sulcal depth; Lung function (FVC); Lung function (FVC); Whole brain restricted isotropic diffusion (multivariate analysis)	Leveraging Polygenic Functional Enrichment to Improve GWAS Power.; The genetic architecture of human cortical folding.; Leveraging Polygenic Functional Enrichment to Improve GWAS Power.; New genetic signals for lung function highlight pathways and chronic obstructive pulmonary disease associations across multiple ancestries.; Multivariate genome-wide association study on tissue-sensitive diffusio…	30595370; 34910505; 30595370; 30804560; 35505052; 30595370; 34910505; 30595370; 30804560; 35505052	2.9999999999999998e-114; 2e-93; 5.000000000000001e-66; 1e-58; 2e-44; 2.9999999999999998e-114; 2e-93; 5.000000000000001e-66; 1e-58; 2e-44	20.5; 0.0379; 20.5; 0.0379	CCDC91; PTHLH	64174; 67943	intergenic; intergenic	1.704; 6.716	7.0; 5.0	0.0; 0.0	0.0; 0.0	0.0; 0.0	10
52; 30	12:65905126:C:T; 12:65905126:C:T	rs79487293; rs79487293	12	65905126; 65905126	5.26736e-28; 2.813460000000001e-18	65769817	66040318	14; 1	13; 1	2; 1	rs79487293;rs6581641; rs79487293	1; 1	rs79487293; rs79487293	vit_T1; vit_T2	rs79487293; rs79487293										Vertex-wise sulcal depth; Vertex-wise cortical thickness; Whole brain restricted isotropic diffusion (multivariate analysis); Whole brain restricted directional diffusion (multivariate analysis); Whole brain free water diffusion (multivariate analysis); Vertex-wise sulcal depth; Vertex-wise cortical thickness; Whole brain restricted isotropic diffusion (multivariate analysis); Whole brain restric…	The genetic architecture of human cortical folding.; The genetic architecture of human cortical folding.; Multivariate genome-wide association study on tissue-sensitive diffusion metrics highlights pathways that shape the human brain.; Multivariate genome-wide association study on tissue-sensitive diffusion metrics highlights pathways that shape the human brain.; Multivariate genome-wide associat…	34910505; 34910505; 35505052; 35505052; 35505052; 34910505; 34910505; 35505052; 35505052; 35505052	3e-110; 1e-44; 9.999999999999999e-43; 1.0000000000000001e-34; 1.0000000000000001e-28; 3e-110; 1e-44; 9.999999999999999e-43; 1.0000000000000001e-34; 1.0000000000000001e-28	22.31; 14.0; 22.31; 14.0	RP11-230G5.2; RP11-230G5.2	0; 0	ncRNA_intronic; ncRNA_intronic	17.35; 17.35	4.0; 4.0	0.0; 0.0	0.0; 0.0	0.0; 0.0	10
31; 53	12:106476805:C:T; 12:106510413:C:T	rs12146713; rs12370774	12	106476805; 106510413	9.36666e-24; 3.76241e-34	106240661	106635414	20; 164	19; 150	4; 8	rs12146713;rs12369969;rs1427793;rs3741884; rs2217685;rs11112850;rs75436288;rs12370774;rs12369969;rs1427793;rs73193841;rs2059769	1; 3	rs12146713; rs2217685;rs75436288;rs12370774	vit_T2; vit_T1	rs12146713; rs2217685	NUAK1; NUAK1	ENSG00000074590; ENSG00000074590	9891; 9891.0	NUAK1; NUAK1	0.189029672518911; 0.189029672518911	0.541314246; 0.541314246	19.0; 27.0	19.59; 19.59	9.36666e-24; 3.76241e-34	Vertex-wise sulcal depth; Whole brain restricted isotropic diffusion (multivariate analysis); Whole brain free water diffusion (multivariate analysis); Whole brain restricted directional diffusion (multivariate analysis); Vertex-wise cortical surface area; Vertex-wise sulcal depth; Whole brain restricted isotropic diffusion (multivariate analysis); Whole brain free water diffusion (multivariate a…	The genetic architecture of human cortical folding.; Multivariate genome-wide association study on tissue-sensitive diffusion metrics highlights pathways that shape the human brain.; Multivariate genome-wide association study on tissue-sensitive diffusion metrics highlights pathways that shape the human brain.; Multivariate genome-wide association study on tissue-sensitive diffusion metrics highl…	34910505; 35505052; 35505052; 35505052; 34910505; 34910505; 35505052; 35505052; 35505052; 34910505	1e-260; 1e-117; 4e-106; 4e-96; 1e-93; 1e-260; 1e-117; 4e-106; 4e-96; 1e-93	34.48; 20.53; 34.48; 20.53	NUAK1; ST13P3	0; 17244	intronic; intergenic	19.59; 3.123	5.0; 5.0	1.0; 0.0	0.0; 0.0	0.0; 0.0	10
54	13:26450564:A:G	rs306395	13	26450564	6.35883e-12	26217305	26598099	46	43	1	rs306395	1	rs306395	vit_T1	rs306395	ATP8A2; AL138815.1; AL138815.2	ENSG00000132932; ENSG00000215549; ENSG00000268344	51761.0	ATP8A2	0.418077899724509	3.364932143	55.0	15.17	6.35883e-12						ATP8A2:AL138815.1	0:0	intronic	1.752		1.0	0.0	0.0	0
55	14:53975570:C:T	rs1959830	14	53975570	1.04046e-10	53792808	54121111	44	39	1	rs1959830	1	rs1959830	vit_T1	rs1959830										Vertex-wise sulcal depth; Whole brain restricted directional diffusion (multivariate analysis); Vertex-wise cortical thickness; Whole brain restricted isotropic diffusion (multivariate analysis); Whole brain free water diffusion (multivariate analysis)	The genetic architecture of human cortical folding.; Multivariate genome-wide association study on tissue-sensitive diffusion metrics highlights pathways that shape the human brain.; The genetic architecture of human cortical folding.; Multivariate genome-wide association study on tissue-sensitive diffusion metrics highlights pathways that shape the human brain.; Multivariate genome-wide associat…	34910505; 35505052; 34910505; 35505052; 35505052	1.0000000000000001e-39; 5e-28; 4.0000000000000004e-24; 9e-22; 2e-21	13.16; 10.12	AL163953.3	0	ncRNA_intronic	0.863	7.0	0.0	0.0	0.0	5
56; 32	14:54410919:C:T; 14:54421917:C:G	rs4444235; rs2855530	14	54410919; 54421917	9.97741e-11; 1.96642e-12	54285919	54560055	10; 27	8; 21	1; 3	rs4444235; rs2855530;rs8014363;rs2358432	1; 1	rs4444235; rs2855530	vit_T1; vit_T2	rs4444235; rs2855530	BMP4; BMP4	ENSG00000125378; ENSG00000125378	652.0; 652	BMP4; BMP4	0.967466005226941; 0.967466005226941	-0.512221976; -0.512221976	10.0; 27.0	22.3; 22.3	9.97741e-11; 1.96642e-12	Heel bone mineral density; Heel bone mineral density; Heel bone mineral density; Lung function (FEV1/FVC); Lung function (FEV1/FVC); Heel bone mineral density; Heel bone mineral density; Heel bone mineral density; Spherical equivalent; Whole brain restricted isotropic diffusion (multivariate analysis)	Leveraging Polygenic Functional Enrichment to Improve GWAS Power.; Identification of 613 new loci associated with heel bone mineral density and a polygenic risk score for bone mineral density, osteoporosis and fracture.; An atlas of genetic influences on osteoporosis in humans and mice.; Leveraging Polygenic Functional Enrichment to Improve GWAS Power.; New genetic signals for lung function highl…	30595370; 30048462; 30598549; 30595370; 30804560; 30048462; 30598549; 30598549; 32352494; 35505052	9e-197; 9e-196; 1.9999999999999998e-42; 1e-41; 2.9999999999999998e-36; 1.9999999999999998e-110; 1.9999999999999998e-42; 5.0000000000000004e-29; 9.999999999999999e-27; 2e-22	0.0635749; 0.0343817; 0.0315; 0.0476138; 0.0343817; 0.0280415; 0.12	MIR5580; BMP4	4225; 0	intergenic; intronic	6.363; 9.429	5.0; 4.0	1.0; 1.0	0.0; 0.0	0.0; 0.0	10
57	14:59605116:A:G	rs117461235	14	59605116	6.38665e-11	59460932	59794949	50	42	1	rs117461235	1	rs117461235	vit_T1	rs117461235	DAAM1	ENSG00000100592	23002.0	DAAM1	0.999990849460485	1.582359631	12.0	16.92	2.30515e-09	Vertex-wise sulcal depth; Vertex-wise cortical surface area; Vertex-wise cortical thickness; Brain morphology (MOSTest); Whole brain restricted isotropic diffusion (multivariate analysis)	The genetic architecture of human cortical folding.; The genetic architecture of human cortical folding.; The genetic architecture of human cortical folding.; Boosting Schizophrenia Genetics by Utilizing Genetic Overlap With Brain Morphology.; Multivariate genome-wide association study on tissue-sensitive diffusion metrics highlights pathways that shape the human brain.	34910505; 34910505; 34910505; 35164939; 35505052	5e-324; 9e-205; 2e-167; 7e-105; 7e-78	30.54; 27.58	CTD-2315A10.2	1976	intergenic	0.715	6.0	0.0	0.0	0.0	5
58	14:75186010:A:G	rs7147721	14	75186010	8.23451e-12	74983290	75503186	116	97	1	rs7147721	1	rs7147721	vit_T1	rs7147721	AREL1; AC007956.1; FCF1; YLPM1; PROX2; DLST; RPS6KL1	ENSG00000119682; ENSG00000214670; ENSG00000119616; ENSG00000119596; ENSG00000119608; ENSG00000119689; ENSG00000198208	9870.0; 51077.0; 56252.0; 283571.0; 1743.0; 83694.0	AREL1; FCF1; YLPM1; PROX2; DLST; RPS6KL1	0.4828434266180076	-0.2170552234999999	148.0	18.66	8.23451e-12	Appendicular lean mass; Depression; Macular thickness; Depression; Well-being spectrum (multivariate analysis)	The genetic architecture of appendicular lean mass characterized by association analysis in the UK Biobank study.; Genome-wide meta-analysis of depression identifies 102 independent variants and highlights the importance of the prefrontal brain regions.; Genome-wide association analyses identify 139 loci associated with macular thickness in the UK Biobank cohort.; Symptom-level modelling unravels…	33097823; 30718901; 30535121; 33859377; 30643256	6e-27; 3.9999999999999997e-25; 3.9999999999999997e-25; 3e-18; 1e-17	0.0204; 1.0224949; 0.692; 0.019671042; 0.007886759	FCF1	0	intronic	8.381	6.0	1.0	0.0	0.0	5
33; 59	15:58243204:A:G; 15:58367677:A:G	rs1441819; rs2704194	15	58243204; 58367677	2.35334e-18; 1.77573e-17	58063859	58563536	305; 327	270; 289	9; 9	rs1441819;rs4646615;rs4646586;rs34958088;rs4646572;rs2464469;rs8035107;rs7175739;rs8042779; rs2704194;rs8035107;rs12906402;rs2028504;rs62003165;rs1063666;rs4646586;rs11857465;rs2899611	1; 1	rs1441819; rs2704194	vit_T2; vit_T1	rs1441819; rs2704194	ALDH1A2; ALDH1A2; AQP9	ENSG00000128918; ENSG00000128918; ENSG00000103569	101928635; 101928635.0; 366.0	ALDH1A2; ALDH1A2; AQP9	0.516630055977224; 0.4816223634526405	1.671453522; 1.7319793154999998	248.0; 281.0	19.71; 19.71	2.35334e-18; 1.77573e-17	Vertex-wise sulcal depth; Whole brain restricted isotropic diffusion (multivariate analysis); Whole brain free water diffusion (multivariate analysis); Whole brain restricted directional diffusion (multivariate analysis); Vertex-wise cortical surface area; Vertex-wise sulcal depth; Whole brain restricted isotropic diffusion (multivariate analysis); Whole brain free water diffusion (multivariate a…	The genetic architecture of human cortical folding.; Multivariate genome-wide association study on tissue-sensitive diffusion metrics highlights pathways that shape the human brain.; Multivariate genome-wide association study on tissue-sensitive diffusion metrics highlights pathways that shape the human brain.; Multivariate genome-wide association study on tissue-sensitive diffusion metrics highl…	34910505; 35505052; 35505052; 35505052; 34910505; 34910505; 35505052; 35505052; 35505052; 34910505	1e-65; 3e-60; 6e-43; 1.9999999999999998e-42; 1.9999999999999998e-32; 1e-65; 3e-60; 6e-43; 1.9999999999999998e-42; 1.9999999999999998e-32	17.12; 11.87; 17.12; 11.87	ALDH1A2; ALDH1A2	2417; 0	intergenic; intronic	0.107; 7.498	5.0	1.0; 1.0	0.0; 0.0	0.0; 0.0	10
34; 60	16:87225101:A:G; 16:87233185:A:C	rs9937293; rs4843553	16	87225101; 87233185	5.73276e-19; 6.95268e-22	87086963	87390439	117; 101	102; 86	8; 5	rs9937293;rs4240791;rs62650864;rs1108048;rs12919133;rs8054379;rs4843231;rs9783786; rs4843553;rs55807115;rs35555768;rs28655023;rs9940975	1; 1	rs9937293; rs4843553	vit_T2; vit_T1	rs9937293; rs4843553	C16orf95; C16orf95	ENSG00000260456; ENSG00000260456	100506581; 100506581.0	C16orf95; C16orf95		0.915813928; 0.915813928	117.0; 101.0	16.49; 16.49	5.73276e-19; 6.95268e-22	Vertex-wise sulcal depth; Vertex-wise cortical thickness; Vertex-wise cortical surface area; Whole brain free water diffusion (multivariate analysis); Whole brain restricted isotropic diffusion (multivariate analysis); Vertex-wise sulcal depth; Vertex-wise cortical thickness; Vertex-wise cortical surface area; Whole brain free water diffusion (multivariate analysis); Whole brain restricted isotro…	The genetic architecture of human cortical folding.; The genetic architecture of human cortical folding.; The genetic architecture of human cortical folding.; Multivariate genome-wide association study on tissue-sensitive diffusion metrics highlights pathways that shape the human brain.; Multivariate genome-wide association study on tissue-sensitive diffusion metrics highlights pathways that shap…	34910505; 34910505; 34910505; 35505052; 35505052; 34910505; 34910505; 34910505; 35505052; 35505052	5e-324; 1e-244; 1.0000000000000001e-159; 1.9999999999999997e-152; 3.999999999999999e-152; 5e-324; 1e-244; 1.0000000000000001e-159; 1.9999999999999997e-152; 3.999999999999999e-152	33.41; 26.92; 33.41; 26.92	C16orf95; C16orf95	0; 0	intergenic; intergenic	1.793; 0.781	7.0	1.0; 1.0	0.0; 0.0	0.0; 0.0	10
61	17:27948844:C:T	rs3760456	17	27948844	1.84756e-12	27800812	28678640	480	390	2	rs3760456;rs34388196	1	rs3760456	vit_T1	rs3760456	GIT1; ANKRD13B; CORO6; SSH2; EFCAB5; NSRP1; SLC6A4	ENSG00000108262; ENSG00000198720; ENSG00000167549; ENSG00000141298; ENSG00000176927; ENSG00000126653; ENSG00000108576	28964.0; 124930.0; 84940.0; 85464.0; 374786.0; 84081.0; 6532.0	GIT1; ANKRD13B; CORO6; SSH2; EFCAB5; NSRP1; SLC6A4	0.5613757761505014	-0.5967665457142858	538.0	22.4	1.84756e-12	Vertex-wise sulcal depth; Monocyte count; Monocyte count; Lung function (FEV1/FVC); Monocyte count	The genetic architecture of human cortical folding.; Trans-ethnic and Ancestry-Specific Blood-Cell Genetics in 746,667 Individuals from 5 Global Populations.; Trans-ethnic and Ancestry-Specific Blood-Cell Genetics in 746,667 Individuals from 5 Global Populations.; Leveraging Polygenic Functional Enrichment to Improve GWAS Power.; The Polygenic and Monogenic Basis of Blood Traits and Diseases.	34910505; 32888493; 32888493; 30595370; 32888494	2e-83; 1e-59; 7e-59; 5.9999999999999996e-55; 1e-53	19.36; 0.030635; 0.03436499	RP11-68I3.2:CORO6:RP11-68I3.10	0:0:0	ncRNA_exonic	4.159	5.0	1.0	0.0	0.0	5
35	18:57386391:A:G	rs870472	18	57386391	1.71761e-10	57253836	57529980	20	19	1	rs870472	1	rs870472	vit_T2	rs870472										Whole brain restricted isotropic diffusion (multivariate analysis); Whole brain restricted directional diffusion (multivariate analysis); Whole brain free water diffusion (multivariate analysis)	Multivariate genome-wide association study on tissue-sensitive diffusion metrics highlights pathways that shape the human brain.; Multivariate genome-wide association study on tissue-sensitive diffusion metrics highlights pathways that shape the human brain.; Multivariate genome-wide association study on tissue-sensitive diffusion metrics highlights pathways that shape the human brain.	35505052; 35505052; 35505052	2e-20; 1e-14; 2e-11		RP11-2N1.2	21746	intergenic	6.416		0.0	0.0	0.0	3
62	20:6466574:A:T	rs6085574	20	6466574	3.62644e-11	6321150	6718583	110	98	2	rs6085574;rs6054308	1	rs6085574	vit_T1	rs6085574										Heel bone mineral density; Heel bone mineral density; Waist-to-hip ratio adjusted for BMI; Waist circumference adjusted for body mass index	Identification of 613 new loci associated with heel bone mineral density and a polygenic risk score for bone mineral density, osteoporosis and fracture.; An atlas of genetic influences on osteoporosis in humans and mice.; Shared Genetic and Experimental Links between Obesity-Related Traits and Asthma Subtypes in UK Biobank.; Shared Genetic and Experimental Links between Obesity-Related Traits and…	30048462; 30598549; 31669095; 31669095	1e-19; 7e-16; 4e-10; 8e-09	0.0200385; 0.015379	CASC20	0	ncRNA_intronic	3.989	5.0	0.0	0.0	0.0	4
36	20:21880340:C:T	rs6047709	20	21880340	4.11749e-12	21648991	22162576	322	298	1	rs6047709	1	rs6047709	vit_T2	rs6047709										Balding type 1; Male-pattern baldness; Male-pattern baldness; Male-pattern baldness; Male-pattern baldness	Leveraging Polygenic Functional Enrichment to Improve GWAS Power.; Genetic prediction of male pattern baldness.; Genetic prediction of male pattern baldness.; Genetic prediction of male pattern baldness.; Genetic prediction of male pattern baldness.	30595370; 28196072; 28196072; 28196072; 28196072	5e-319; 1e-103; 1e-103; 3e-102; 1e-87	0.133999; 0.13; 0.13; 0.123564	RP5-1185K9.1	47944	intergenic	0.149	7.0	0.0	0.0	0.0	5
63	20:34019579:C:T	rs224329	20	34019579	3.50732e-16	33674280	34151139	178	146	2	rs224329;rs7280	1	rs224329	vit_T1	rs224329	EDEM2; MMP24; EIF6; FAM83C; UQCC1; GDF5OS; GDF5	ENSG00000088298; ENSG00000125966; ENSG00000242372; ENSG00000125998; ENSG00000101019; ENSG00000204183; ENSG00000125965	55741.0; 10893.0; 3692.0; 128876.0; 55245.0; 8200.0	EDEM2; MMP24; EIF6; FAM83C; UQCC1; GDF5OS; GDF5	0.2544699180856722	-0.2003124663333333	210.0	21.2	3.50732e-16	Height; Appendicular lean mass; Height; Anthropometric traits; Anthropometric traits (multi-trait analysis)	A cross-population atlas of genetic associations for 220 human phenotypes.; The genetic architecture of appendicular lean mass characterized by association analysis in the UK Biobank study.; Leveraging Polygenic Functional Enrichment to Improve GWAS Power.; Multitrait genome association analysis identifies new susceptibility genes for human anthropometric variation in the GCAT cohort.; Multitrait…	34594039; 33097823; 30595370; 30166351; 30166351	0.0; 7e-319; 1e-300; 9e-292; 1e-170	0.0573; 0.0725; 0.06411	GDF5OS	1247	intergenic	0.271	5.0	1.0	0.0	0.0	5
37	20:38552107:A:T	rs2224539	20	38552107	4.97169e-11	38324872	38695657	25	23	2	rs2224539;rs211864	1	rs2224539	vit_T2	rs2224539										High light scatter reticulocyte percentage of red cells; High light scatter reticulocyte count; Reticulocyte fraction of red cells; Reticulocyte count; Mean corpuscular volume	The Polygenic and Monogenic Basis of Blood Traits and Diseases.; The Polygenic and Monogenic Basis of Blood Traits and Diseases.; The Polygenic and Monogenic Basis of Blood Traits and Diseases.; The Polygenic and Monogenic Basis of Blood Traits and Diseases.; Trans-ethnic and Ancestry-Specific Blood-Cell Genetics in 746,667 Individuals from 5 Global Populations.	32888494; 32888494; 32888494; 32888494; 32888493	1e-41; 1e-37; 2.9999999999999998e-36; 9e-31; 1.0000000000000001e-29	0.030603474; 0.029050723; 0.02860158; 0.026235113	HSPE1P1	9456	intergenic	11.17	7.0	0.0	0.0	0.0	5
Supp Table 5 All discovered loci SM-UDIP

## Sheet: Table6-IDP Iist
UKB ID	IDP short name	Units	Type	Cat.	Category name	IDP description
25001	IDP T1 SIENAX peripheral grey normalised volume	mm3	float	1	regional and tissue volume	Volume of peripheral cortical grey matter (from T1 brain image, normalised for head size)
25002	IDP T1 SIENAX peripheral grey unnormalised volume	mm3	float	1	regional and tissue volume	Volume of peripheral cortical grey matter (from T1 brain image)
25003	IDP T1 SIENAX CSF normalised volume	mm3	float	1	regional and tissue volume	Volume of ventricular cerebrospinal fluid (from T1 brain image, normalised for head size)
25004	IDP T1 SIENAX CSF unnormalised volume	mm3	float	1	regional and tissue volume	Volume of ventricular cerebrospinal fluid (from T1 brain image)
25005	IDP T1 SIENAX grey normalised volume	mm3	float	1	regional and tissue volume	Volume of grey matter (from T1 brain image, normalised for head size)
25006	IDP T1 SIENAX grey unnormalised volume	mm3	float	1	regional and tissue volume	Volume of grey matter (from T1 brain image)
25007	IDP T1 SIENAX white normalised volume	mm3	float	1	regional and tissue volume	Volume of white matter (from T1 brain image, normalised for head size)
25008	IDP T1 SIENAX white unnormalised volume	mm3	float	1	regional and tissue volume	Volume of white matter (from T1 brain image)
25009	IDP T1 SIENAX brain-normalised volume	mm3	float	1	regional and tissue volume	Volume of brain, grey+white, from T1 brain image, normalised for head size
25010	IDP T1 SIENAX brain-unnormalised volume	mm3	float	1	regional and tissue volume	Volume of brain, grey+white, from T1 brain image
25011	IDP T1 FIRST left thalamus volume	mm3	float	1	regional and tissue volume	Volume of left thalamus (from T1 brain image)
25012	IDP T1 FIRST right thalamus volume	mm3	float	1	regional and tissue volume	Volume of right thalamus (from T1 brain image)
25013	IDP T1 FIRST left caudate volume	mm3	float	1	regional and tissue volume	Volume of left caudate (from T1 brain image)
25014	IDP T1 FIRST right caudate volume	mm3	float	1	regional and tissue volume	Volume of right caudate (from T1 brain image)
25015	IDP T1 FIRST left putamen volume	mm3	float	1	regional and tissue volume	Volume of left putamen (from T1 brain image)
25016	IDP T1 FIRST right putamen volume	mm3	float	1	regional and tissue volume	Volume of right putamen (from T1 brain image)
25017	IDP T1 FIRST left pallidum volume	mm3	float	1	regional and tissue volume	Volume of left pallidum (from T1 brain image)
25018	IDP T1 FIRST right pallidum volume	mm3	float	1	regional and tissue volume	Volume of right pallidum (from T1 brain image)
25019	IDP T1 FIRST left hippocampus volume	mm3	float	1	regional and tissue volume	Volume of left hippocampus (from T1 brain image)
25020	IDP T1 FIRST right hippocampus volume	mm3	float	1	regional and tissue volume	Volume of right hippocampus (from T1 brain image)
25021	IDP T1 FIRST left amygdala volume	mm3	float	1	regional and tissue volume	Volume of left amygdala (from T1 brain image)
25022	IDP T1 FIRST right amygdala volume	mm3	float	1	regional and tissue volume	Volume of right amygdala (from T1 brain image)
25023	IDP T1 FIRST left accumbens volume	mm3	float	1	regional and tissue volume	Volume of left accumbens (from T1 brain image)
25024	IDP T1 FIRST right accumbens volume	mm3	float	1	regional and tissue volume	Volume of right accumbens (from T1 brain image)
25025	IDP T1 FIRST brain stem+4th ventricle volume	mm3	float	1	regional and tissue volume	Volume of brain stem + 4th ventricle (from T1 brain image)
25782	IDP T1 FAST ROIs L frontal pole	mm3	float	1	regional and tissue volume	Volume of grey matter in Left Frontal Pole
25783	IDP T1 FAST ROIs R frontal pole	mm3	float	1	regional and tissue volume	Volume of grey matter in Right Frontal Pole
25784	IDP T1 FAST ROIs L insular cortex	mm3	float	1	regional and tissue volume	Volume of grey matter in Left Insular Cortex
25785	IDP T1 FAST ROIs R insular cortex	mm3	float	1	regional and tissue volume	Volume of grey matter in Right Insular Cortex
25786	IDP T1 FAST ROIs L sup front gyrus	mm3	float	1	regional and tissue volume	Volume of grey matter in Left Superior Frontal Gyrus
25787	IDP T1 FAST ROIs R sup front gyrus	mm3	float	1	regional and tissue volume	Volume of grey matter in Right Superior Frontal Gyrus
25788	IDP T1 FAST ROIs L mid front gyrus	mm3	float	1	regional and tissue volume	Volume of grey matter in Left Middle Frontal Gyrus
25789	IDP T1 FAST ROIs R mid front gyrus	mm3	float	1	regional and tissue volume	Volume of grey matter in Right Middle Frontal Gyrus
25790	IDP T1 FAST ROIs L inf front gyrus parstri	mm3	float	1	regional and tissue volume	Volume of grey matter in Left Inferior Frontal Gyrus, pars triangularis
25791	IDP T1 FAST ROIs R inf front gyrus parstri	mm3	float	1	regional and tissue volume	Volume of grey matter in Right Inferior Frontal Gyrus, pars triangularis
25792	IDP T1 FAST ROIs L inf front gyrus parsop	mm3	float	1	regional and tissue volume	Volume of grey matter in Left Inferior Frontal Gyrus, pars opercularis
25793	IDP T1 FAST ROIs R inf front gyrus parsop	mm3	float	1	regional and tissue volume	Volume of grey matter in Right Inferior Frontal Gyrus, pars opercularis
25794	IDP T1 FAST ROIs L precentral gyrus	mm3	float	1	regional and tissue volume	Volume of grey matter in Left Precentral Gyrus
25795	IDP T1 FAST ROIs R precentral gyrus	mm3	float	1	regional and tissue volume	Volume of grey matter in Right Precentral Gyrus
25796	IDP T1 FAST ROIs L temporal pole	mm3	float	1	regional and tissue volume	Volume of grey matter in Left Temporal Pole
25797	IDP T1 FAST ROIs R temporal pole	mm3	float	1	regional and tissue volume	Volume of grey matter in Right Temporal Pole
25798	IDP T1 FAST ROIs L sup temp gyrus ant	mm3	float	1	regional and tissue volume	Volume of grey matter in Left Superior Temporal Gyrus, anterior division
25799	IDP T1 FAST ROIs R sup temp gyrus ant	mm3	float	1	regional and tissue volume	Volume of grey matter in Right Superior Temporal Gyrus, anterior division
25800	IDP T1 FAST ROIs L sup temp gyrus post	mm3	float	1	regional and tissue volume	Volume of grey matter in Left Superior Temporal Gyrus, posterior division
25801	IDP T1 FAST ROIs R sup temp gyrus post	mm3	float	1	regional and tissue volume	Volume of grey matter in Right Superior Temporal Gyrus, posterior division
25802	IDP T1 FAST ROIs L mid temp gyrus ant	mm3	float	1	regional and tissue volume	Volume of grey matter in Left Middle Temporal Gyrus, anterior division
25803	IDP T1 FAST ROIs R mid temp gyrus ant	mm3	float	1	regional and tissue volume	Volume of grey matter in Right Middle Temporal Gyrus, anterior division
25804	IDP T1 FAST ROIs L mid temp gyrus post	mm3	float	1	regional and tissue volume	Volume of grey matter in Left Middle Temporal Gyrus, posterior division
25805	IDP T1 FAST ROIs R mid temp gyrus post	mm3	float	1	regional and tissue volume	Volume of grey matter in Right Middle Temporal Gyrus, posterior division
25806	IDP T1 FAST ROIs L mid temp gyrus tempocc	mm3	float	1	regional and tissue volume	Volume of grey matter in Left Middle Temporal Gyrus, temporooccipital part
25807	IDP T1 FAST ROIs R mid temp gyrus tempocc	mm3	float	1	regional and tissue volume	Volume of grey matter in Right Middle Temporal Gyrus, temporooccipital part
25808	IDP T1 FAST ROIs L inf temp gyrus ant	mm3	float	1	regional and tissue volume	Volume of grey matter in Left Inferior Temporal Gyrus, anterior division
25809	IDP T1 FAST ROIs R inf temp gyrus ant	mm3	float	1	regional and tissue volume	Volume of grey matter in Right Inferior Temporal Gyrus, anterior division
25810	IDP T1 FAST ROIs L inf temp gyrus post	mm3	float	1	regional and tissue volume	Volume of grey matter in Left Inferior Temporal Gyrus, posterior division
25811	IDP T1 FAST ROIs R inf temp gyrus post	mm3	float	1	regional and tissue volume	Volume of grey matter in Right Inferior Temporal Gyrus, posterior division
25812	IDP T1 FAST ROIs L inf temp gyrus tempocc	mm3	float	1	regional and tissue volume	Volume of grey matter in Left Inferior Temporal Gyrus, temporooccipital part
25813	IDP T1 FAST ROIs R inf temp gyrus tempocc	mm3	float	1	regional and tissue volume	Volume of grey matter in Right Inferior Temporal Gyrus, temporooccipital part
25814	IDP T1 FAST ROIs L postcent gyrus	mm3	float	1	regional and tissue volume	Volume of grey matter in Left Postcentral Gyrus
25815	IDP T1 FAST ROIs R postcent gyrus	mm3	float	1	regional and tissue volume	Volume of grey matter in Right Postcentral Gyrus
25816	IDP T1 FAST ROIs L sup parietal lobule	mm3	float	1	regional and tissue volume	Volume of grey matter in Left Superior Parietal Lobule
25817	IDP T1 FAST ROIs R sup parietal lobule	mm3	float	1	regional and tissue volume	Volume of grey matter in Right Superior Parietal Lobule
25818	IDP T1 FAST ROIs L supramarg gyrus ant	mm3	float	1	regional and tissue volume	Volume of grey matter in Left Supramarginal Gyrus, anterior division
25819	IDP T1 FAST ROIs R supramarg gyrus ant	mm3	float	1	regional and tissue volume	Volume of grey matter in Right Supramarginal Gyrus, anterior division
25820	IDP T1 FAST ROIs L supramarg gyrus post	mm3	float	1	regional and tissue volume	Volume of grey matter in Left Supramarginal Gyrus, posterior division
25821	IDP T1 FAST ROIs R supramarg gyrus post	mm3	float	1	regional and tissue volume	Volume of grey matter in Right Supramarginal Gyrus, posterior division
25822	IDP T1 FAST ROIs L angular gyrus	mm3	float	1	regional and tissue volume	Volume of grey matter in Left Angular Gyrus
25823	IDP T1 FAST ROIs R angular gyrus	mm3	float	1	regional and tissue volume	Volume of grey matter in Right Angular Gyrus
25824	IDP T1 FAST ROIs L latocc cortex sup	mm3	float	1	regional and tissue volume	Volume of grey matter in Left Lateral Occipital Cortex, superior division
25825	IDP T1 FAST ROIs R latocc cortex sup	mm3	float	1	regional and tissue volume	Volume of grey matter in Right Lateral Occipital Cortex, superior division
25826	IDP T1 FAST ROIs L latocc cortex inf	mm3	float	1	regional and tissue volume	Volume of grey matter in Left Lateral Occipital Cortex, inferior division
25827	IDP T1 FAST ROIs R latocc cortex inf	mm3	float	1	regional and tissue volume	Volume of grey matter in Right Lateral Occipital Cortex, inferior division
25828	IDP T1 FAST ROIs L intracalc cortex	mm3	float	1	regional and tissue volume	Volume of grey matter in Left Intracalcarine Cortex
25829	IDP T1 FAST ROIs R intracalc cortex	mm3	float	1	regional and tissue volume	Volume of grey matter in Right Intracalcarine Cortex
25830	IDP T1 FAST ROIs L front med cortex	mm3	float	1	regional and tissue volume	Volume of grey matter in Left Frontal Medial Cortex
25831	IDP T1 FAST ROIs R front med cortex	mm3	float	1	regional and tissue volume	Volume of grey matter in Right Frontal Medial Cortex
25832	IDP T1 FAST ROIs L juxtapos lobule cortex	mm3	float	1	regional and tissue volume	Volume of grey matter in Left Juxtapositional Lobule Cortex (formerly Supplementary Motor Cortex)
25833	IDP T1 FAST ROIs R juxtapos lobule cortex	mm3	float	1	regional and tissue volume	Volume of grey matter in Right Juxtapositional Lobule Cortex (formerly Supplementary Motor Cortex)
25834	IDP T1 FAST ROIs L subcallosal cortex	mm3	float	1	regional and tissue volume	Volume of grey matter in Left Subcallosal Cortex
25835	IDP T1 FAST ROIs R subcallosal cortex	mm3	float	1	regional and tissue volume	Volume of grey matter in Right Subcallosal Cortex
25836	IDP T1 FAST ROIs L paracing gyrus	mm3	float	1	regional and tissue volume	Volume of grey matter in Left Paracingulate Gyrus
25837	IDP T1 FAST ROIs R paracing gyrus	mm3	float	1	regional and tissue volume	Volume of grey matter in Right Paracingulate Gyrus
25838	IDP T1 FAST ROIs L cing gyrus ant	mm3	float	1	regional and tissue volume	Volume of grey matter in Left Cingulate Gyrus, anterior division
25839	IDP T1 FAST ROIs R cing gyrus ant	mm3	float	1	regional and tissue volume	Volume of grey matter in Right Cingulate Gyrus, anterior division
25840	IDP T1 FAST ROIs L cing gyrus post	mm3	float	1	regional and tissue volume	Volume of grey matter in Left Cingulate Gyrus, posterior division
25841	IDP T1 FAST ROIs R cing gyrus post	mm3	float	1	regional and tissue volume	Volume of grey matter in Right Cingulate Gyrus, posterior division
25842	IDP T1 FAST ROIs L precun cortex	mm3	float	1	regional and tissue volume	Volume of grey matter in Left Precuneous Cortex
25843	IDP T1 FAST ROIs R precun cortex	mm3	float	1	regional and tissue volume	Volume of grey matter in Right Precuneous Cortex
25844	IDP T1 FAST ROIs L cuneal cortex	mm3	float	1	regional and tissue volume	Volume of grey matter in Left Cuneal Cortex
25845	IDP T1 FAST ROIs R cuneal cortex	mm3	float	1	regional and tissue volume	Volume of grey matter in Right Cuneal Cortex
25846	IDP T1 FAST ROIs L front orb cortex	mm3	float	1	regional and tissue volume	Volume of grey matter in Left Frontal Orbital Cortex
25847	IDP T1 FAST ROIs R front orb cortex	mm3	float	1	regional and tissue volume	Volume of grey matter in Right Frontal Orbital Cortex
25848	IDP T1 FAST ROIs L parahipp gyrus ant	mm3	float	1	regional and tissue volume	Volume of grey matter in Left Parahippocampal Gyrus, anterior division
25849	IDP T1 FAST ROIs R parahipp gyrus ant	mm3	float	1	regional and tissue volume	Volume of grey matter in Right Parahippocampal Gyrus, anterior division
25850	IDP T1 FAST ROIs L parahipp gyrus post	mm3	float	1	regional and tissue volume	Volume of grey matter in Left Parahippocampal Gyrus, posterior division
25851	IDP T1 FAST ROIs R parahipp gyrus post	mm3	float	1	regional and tissue volume	Volume of grey matter in Right Parahippocampal Gyrus, posterior division
25852	IDP T1 FAST ROIs L lingual gyrus	mm3	float	1	regional and tissue volume	Volume of grey matter in Left Lingual Gyrus
25853	IDP T1 FAST ROIs R lingual gyrus	mm3	float	1	regional and tissue volume	Volume of grey matter in Right Lingual Gyrus
25854	IDP T1 FAST ROIs L temp fusif cortex ant	mm3	float	1	regional and tissue volume	Volume of grey matter in Left Temporal Fusiform Cortex, anterior division
25855	IDP T1 FAST ROIs R temp fusif cortex ant	mm3	float	1	regional and tissue volume	Volume of grey matter in Right Temporal Fusiform Cortex, anterior division
25856	IDP T1 FAST ROIs L temp fusif cortex post	mm3	float	1	regional and tissue volume	Volume of grey matter in Left Temporal Fusiform Cortex, posterior division
25857	IDP T1 FAST ROIs R temp fusif cortex post	mm3	float	1	regional and tissue volume	Volume of grey matter in Right Temporal Fusiform Cortex, posterior division
25858	IDP T1 FAST ROIs L temp occ fusif cortex	mm3	float	1	regional and tissue volume	Volume of grey matter in Left Temporal Occipital Fusiform Cortex
25859	IDP T1 FAST ROIs R temp occ fusif cortex	mm3	float	1	regional and tissue volume	Volume of grey matter in Right Temporal Occipital Fusiform Cortex
25860	IDP T1 FAST ROIs L occ fusif gyrus	mm3	float	1	regional and tissue volume	Volume of grey matter in Left Occipital Fusiform Gyrus
25861	IDP T1 FAST ROIs R occ fusif gyrus	mm3	float	1	regional and tissue volume	Volume of grey matter in Right Occipital Fusiform Gyrus
25862	IDP T1 FAST ROIs L front operc cortex	mm3	float	1	regional and tissue volume	Volume of grey matter in Left Frontal Operculum Cortex
25863	IDP T1 FAST ROIs R front operc cortex	mm3	float	1	regional and tissue volume	Volume of grey matter in Right Frontal Operculum Cortex
25864	IDP T1 FAST ROIs L cent operc cortex	mm3	float	1	regional and tissue volume	Volume of grey matter in Left Central Opercular Cortex
25865	IDP T1 FAST ROIs R cent operc cortex	mm3	float	1	regional and tissue volume	Volume of grey matter in Right Central Opercular Cortex
25866	IDP T1 FAST ROIs L parietal operc cortex	mm3	float	1	regional and tissue volume	Volume of grey matter in Left Parietal Operculum Cortex
25867	IDP T1 FAST ROIs R parietal operc cortex	mm3	float	1	regional and tissue volume	Volume of grey matter in Right Parietal Operculum Cortex
25868	IDP T1 FAST ROIs L planum polare	mm3	float	1	regional and tissue volume	Volume of grey matter in Left Planum Polare
25869	IDP T1 FAST ROIs R planum polare	mm3	float	1	regional and tissue volume	Volume of grey matter in Right Planum Polare
25870	IDP T1 FAST ROIs L heschl gyrus	mm3	float	1	regional and tissue volume	Volume of grey matter in Left Heschl's Gyrus (includes H1 and H2)
25871	IDP T1 FAST ROIs R heschl gyrus	mm3	float	1	regional and tissue volume	Volume of grey matter in Right Heschl's Gyrus (includes H1 and H2)
25872	IDP T1 FAST ROIs L planum temporale	mm3	float	1	regional and tissue volume	Volume of grey matter in Left Planum Temporale
25873	IDP T1 FAST ROIs R planum temporale	mm3	float	1	regional and tissue volume	Volume of grey matter in Right Planum Temporale
25874	IDP T1 FAST ROIs L supracalc cortex	mm3	float	1	regional and tissue volume	Volume of grey matter in Left Supracalcarine Cortex
25875	IDP T1 FAST ROIs R supracalc cortex	mm3	float	1	regional and tissue volume	Volume of grey matter in Right Supracalcarine Cortex
25876	IDP T1 FAST ROIs L occ pole	mm3	float	1	regional and tissue volume	Volume of grey matter in Left Occipital Pole
25877	IDP T1 FAST ROIs R occ pole	mm3	float	1	regional and tissue volume	Volume of grey matter in Right Occipital Pole
25878	IDP T1 FAST ROIs L thalamus	mm3	float	1	regional and tissue volume	Volume of grey matter in Left Thalamus
25879	IDP T1 FAST ROIs R thalamus	mm3	float	1	regional and tissue volume	Volume of grey matter in Right Thalamus
25880	IDP T1 FAST ROIs L caudate	mm3	float	1	regional and tissue volume	Volume of grey matter in Left Caudate
25881	IDP T1 FAST ROIs R caudate	mm3	float	1	regional and tissue volume	Volume of grey matter in Right Caudate
25882	IDP T1 FAST ROIs L putamen	mm3	float	1	regional and tissue volume	Volume of grey matter in Left Putamen
25883	IDP T1 FAST ROIs R putamen	mm3	float	1	regional and tissue volume	Volume of grey matter in Right Putamen
25884	IDP T1 FAST ROIs L pallidum	mm3	float	1	regional and tissue volume	Volume of grey matter in Left Pallidum
25885	IDP T1 FAST ROIs R pallidum	mm3	float	1	regional and tissue volume	Volume of grey matter in Right Pallidum
25886	IDP T1 FAST ROIs L hippocampus	mm3	float	1	regional and tissue volume	Volume of grey matter in Left Hippocampus
25887	IDP T1 FAST ROIs R hippocampus	mm3	float	1	regional and tissue volume	Volume of grey matter in Right Hippocampus
25888	IDP T1 FAST ROIs L amygdala	mm3	float	1	regional and tissue volume	Volume of grey matter in Left Amygdala
25889	IDP T1 FAST ROIs R amygdala	mm3	float	1	regional and tissue volume	Volume of grey matter in Right Amygdala
25890	IDP T1 FAST ROIs L ventral striatum	mm3	float	1	regional and tissue volume	Volume of grey matter in Left Ventral Striatum
25891	IDP T1 FAST ROIs R ventral striatum	mm3	float	1	regional and tissue volume	Volume of grey matter in Right Ventral Striatum
25892	IDP T1 FAST ROIs brain stem	mm3	float	1	regional and tissue volume	Volume of grey matter in Brain-Stem
25893	IDP T1 FAST ROIs L cerebellum I-IV	mm3	float	1	regional and tissue volume	Volume of grey matter in Left I-IV Cerebellum
25894	IDP T1 FAST ROIs R cerebellum I-IV	mm3	float	1	regional and tissue volume	Volume of grey matter in Right I-IV Cerebellum
25895	IDP T1 FAST ROIs L cerebellum V	mm3	float	1	regional and tissue volume	Volume of grey matter in Left V Cerebellum
25896	IDP T1 FAST ROIs R cerebellum V	mm3	float	1	regional and tissue volume	Volume of grey matter in Right V Cerebellum
25897	IDP T1 FAST ROIs L cerebellum VI	mm3	float	1	regional and tissue volume	Volume of grey matter in Left VI Cerebellum
25898	IDP T1 FAST ROIs V cerebellum VI	mm3	float	1	regional and tissue volume	Volume of grey matter in Vermis VI Cerebellum
25899	IDP T1 FAST ROIs R cerebellum VI	mm3	float	1	regional and tissue volume	Volume of grey matter in Right VI Cerebellum
25900	IDP T1 FAST ROIs L cerebellum crus I	mm3	float	1	regional and tissue volume	Volume of grey matter in Left Crus I Cerebellum
25901	IDP T1 FAST ROIs V cerebellum crus I	mm3	float	1	regional and tissue volume	Volume of grey matter in Vermis Crus I Cerebellum
25902	IDP T1 FAST ROIs R cerebellum crus I	mm3	float	1	regional and tissue volume	Volume of grey matter in Right Crus I Cerebellum
25903	IDP T1 FAST ROIs L cerebellum crus II	mm3	float	1	regional and tissue volume	Volume of grey matter in Left Crus II Cerebellum
25904	IDP T1 FAST ROIs V cerebellum crus II	mm3	float	1	regional and tissue volume	Volume of grey matter in Vermis Crus II Cerebellum
25905	IDP T1 FAST ROIs R cerebellum crus II	mm3	float	1	regional and tissue volume	Volume of grey matter in Right Crus II Cerebellum
25906	IDP T1 FAST ROIs L cerebellum VIIb	mm3	float	1	regional and tissue volume	Volume of grey matter in Left VIIb Cerebellum
25907	IDP T1 FAST ROIs V cerebellum VIIb	mm3	float	1	regional and tissue volume	Volume of grey matter in Vermis VIIb Cerebellum
25908	IDP T1 FAST ROIs R cerebellum VIIb	mm3	float	1	regional and tissue volume	Volume of grey matter in Right VIIb Cerebellum
25909	IDP T1 FAST ROIs L cerebellum VIIIa	mm3	float	1	regional and tissue volume	Volume of grey matter in Left VIIIa Cerebellum
25910	IDP T1 FAST ROIs V cerebellum VIIIa	mm3	float	1	regional and tissue volume	Volume of grey matter in Vermis VIIIa Cerebellum
25911	IDP T1 FAST ROIs R cerebellum VIIIa	mm3	float	1	regional and tissue volume	Volume of grey matter in Right VIIIa Cerebellum
25912	IDP T1 FAST ROIs L cerebellum VIIIb	mm3	float	1	regional and tissue volume	Volume of grey matter in Left VIIIb Cerebellum
25913	IDP T1 FAST ROIs V cerebellum VIIIb	mm3	float	1	regional and tissue volume	Volume of grey matter in Vermis VIIIb Cerebellum
25914	IDP T1 FAST ROIs R cerebellum VIIIb	mm3	float	1	regional and tissue volume	Volume of grey matter in Right VIIIb Cerebellum
25915	IDP T1 FAST ROIs L cerebellum IX	mm3	float	1	regional and tissue volume	Volume of grey matter in Left IX Cerebellum
25916	IDP T1 FAST ROIs V cerebellum IX	mm3	float	1	regional and tissue volume	Volume of grey matter in Vermis IX Cerebellum
25917	IDP T1 FAST ROIs R cerebellum IX	mm3	float	1	regional and tissue volume	Volume of grey matter in Right IX Cerebellum
25918	IDP T1 FAST ROIs L cerebellum X	mm3	float	1	regional and tissue volume	Volume of grey matter in Left X Cerebellum
25919	IDP T1 FAST ROIs V cerebellum X	mm3	float	1	regional and tissue volume	Volume of grey matter in Vermis X Cerebellum
25920	IDP T1 FAST ROIs R cerebellum X	mm3	float	1	regional and tissue volume	Volume of grey matter in Right X Cerebellum
25781	IDP T2 FLAIR BIANCA WMH volume	mm3	int	6	white matter hyperintensity volume	Total volume of white matter hyperintensities (from T1 and T2_FLAIR images)
25026	IDP SWI T2star left thalamus	ms	float	7	regional T2*	Median T2star in left thalamus (from SWI data)
25027	IDP SWI T2star right thalamus	ms	float	7	regional T2*	Median T2star in right thalamus (from SWI data)
25028	IDP SWI T2star left caudate	ms	float	7	regional T2*	Median T2star in left caudate (from SWI data)
25029	IDP SWI T2star right caudate	ms	float	7	regional T2*	Median T2star in right caudate (from SWI data)
25030	IDP SWI T2star left putamen	ms	float	7	regional T2*	Median T2star in left putamen (from SWI data)
25031	IDP SWI T2star right putamen	ms	float	7	regional T2*	Median T2star in right putamen (from SWI data)
25032	IDP SWI T2star left pallidum	ms	float	7	regional T2*	Median T2star in left pallidum (from SWI data)
25033	IDP SWI T2star right pallidum	ms	float	7	regional T2*	Median T2star in right pallidum (from SWI data)
25034	IDP SWI T2star left hippocampus	ms	float	7	regional T2*	Median T2star in left hippocampus (from SWI data)
25035	IDP SWI T2star right hippocampus	ms	float	7	regional T2*	Median T2star in right hippocampus (from SWI data)
25036	IDP SWI T2star left amygdala	ms	float	7	regional T2*	Median T2star in left amygdala (from SWI data)
25037	IDP SWI T2star right amygdala	ms	float	7	regional T2*	Median T2star in right amygdala (from SWI data)
25038	IDP SWI T2star left accumbens	ms	float	7	regional T2*	Median T2star in left accumbens (from SWI data)
25039	IDP SWI T2star right accumbens	ms	float	7	regional T2*	Median T2star in right accumbens (from SWI data)
Supp Table 6 IDP list

## Sheet: Table7-loci MM & ViT crossattn
GenomicLocus	uniqID	rsID	chr	pos	p	start	end	nSNPs	nGWASSNPs	nIndSigSNPs	IndSigSNPs	nLeadSNPs	LeadSNPs	SOURCE	Nearest Gene
19	7:120966790:A:G	rs3779381	7	120966790	1.19105e-93	120748257	121040782	571	475	30	rs6948725;rs2536150;rs798906;rs798903;rs17509082;rs1547960;rs2707520;rs62476338;rs2968349;rs6954210;rs17356657;rs17284876;rs798908;rs73717494;rs76042375;rs74879064;rs2110279;rs73215359;rs79162867;rs7779605;rs73217391;rs2908004;rs13247600;rs3779381;rs1541509;rs12539842;rs17143281;rs79589991;rs2952565;rs1609291	8	rs6948725;rs798908;rs73217391;rs13247600;rs3779381;rs79589991;rs2952565;rs1609291	vit_crossattn_T1_and_vit_crossattn_T2	CADM2
17	7:120994169:G:T	rs3801383	7	120994169	4.28931e-82	120748257	121040782	519	413	25	rs6948725;rs2536150;rs798906;rs10233441;rs17509082;rs2707520;rs2707518;rs2968349;rs17356657;rs17284876;rs798909;rs76042375;rs74879064;rs2110279;rs79162867;rs7779605;rs73217391;rs2536189;rs13247600;rs17143281;rs3801383;rs1541509;rs79589991;rs2952565;rs1609291	9	rs6948725;rs798909;rs73217391;rs13247600;rs17143281;rs3801383;rs79589991;rs2952565;rs1609291	vit_crossattn_T1_and_vit_crossattn_T2
18	7:120974765:A:G	rs3801387	7	120974765	1.53088e-60	120748257	121040782	250	213	18	rs4731007;rs798906;rs10233441;rs17509082;rs2707520;rs2707518;rs17356657;rs17284876;rs798908;rs76042375;rs2110279;rs79162867;rs13247600;rs9769381;rs3801387;rs1541509;rs2536189;rs2952565	6	rs4731007;rs798908;rs13247600;rs9769381;rs3801387;rs2952565	mocov2_T1_and_mocov2_T2
19	7:120974765:A:G	rs3801387	7	120974765	1.12328e-46	120748257	121040782	205	176	15	rs79162867;rs76042375;rs2140648;rs798906;rs10233441;rs17509082;rs2707520;rs2707518;rs12668590;rs17284876;rs13247600;rs12706326;rs9769381;rs3801387;rs2908004	5	rs79162867;rs2140648;rs13247600;rs9769381;rs3801387	mocov2_T1_and_mocov2_T2
7	2:71958303:A:G	rs4417739	2	71958303	1.11315e-16	71951050	72009917	71	62	2	rs4417739;rs13016025	1	rs4417739	vit_crossattn_T1_and_vit_crossattn_T2	ACVR1C
6	2:71954468:A:G	rs6760396	2	71954468	7.14924e-17	71951050	72009917	66	59	2	rs6760396;rs13033431	1	rs6760396	vit_crossattn_T1_and_vit_crossattn_T2
6	2:71961307:C:T	rs12466122	2	71961307	1.78038e-13	71951050	72009917	66	59	2	rs12466122;rs13033431	1	rs12466122	mocov2_T1_and_mocov2_T2
5	2:71961307:C:T	rs12466122	2	71961307	1.43902e-12	71951050	72009917	66	59	2	rs12466122;rs13033431	1	rs12466122	mocov2_T1_and_mocov2_T2
33	12:106476805:C:T	rs12146713	12	106476805	5.90229e-24	106476805	106510413	20	19	3	rs12146713;rs1427793;rs17038091	1	rs12146713	vit_crossattn_T1_and_vit_crossattn_T2	OAS1 OAS3
27	12:106476805:C:T	rs12146713	12	106476805	3.8601e-25	106476805	106510413	20	19	4	rs12146713;rs12369969;rs1427793;rs3741884	1	rs12146713	vit_crossattn_T1_and_vit_crossattn_T2
29	12:106476805:C:T	rs12146713	12	106476805	1.24314e-15	106476805	106510413	3	3	1	rs12146713	1	rs12146713	mocov2_T1_and_mocov2_T2
32	12:106476805:C:T	rs12146713	12	106476805	1.87509e-17	106476805	106510413	153	139	3	rs2248542;rs12146713;rs17038091	2	rs2248542;rs12146713	mocov2_T1_and_mocov2_T2
10	4:103188709:C:T	rs13107325	4	103188709	8.82769e-17	103001649	103387161	30	30	4	rs13107325;rs34333163;rs34592089;rs6855246	1	rs13107325	mocov2_T1_and_mocov2_T2	SLC39A8
10	4:103198082:A:G	rs13135092	4	103198082	1.30637e-14	103001649	103387161	25	25	2	rs13135092;rs34333163	1	rs13135092	mocov2_T1_and_mocov2_T2
12	4:103188709:C:T	rs13107325	4	103188709	3.03101e-21	103001649	103387161	30	30	4	rs13107325;rs34333163;rs34592089;rs6855246	1	rs13107325	vit_crossattn_T1_and_vit_crossattn_T2
11	4:103188709:C:T	rs13107325	4	103188709	4.94044e-16	103001649	103387161	30	30	4	rs13107325;rs34333163;rs34592089;rs6855246	1	rs13107325	vit_crossattn_T1_and_vit_crossattn_T2
10	3:190640134:A:T	rs4308324	3	190640134	7.49934e-24	190592836	190678743	245	184	4	rs4308324;rs61634624;rs113591830;rs12488471	2	rs4308324;rs113591830	vit_crossattn_T1_and_vit_crossattn_T2	IGF2BP2
9	3:190640134:A:T	rs4308324	3	190640134	5.91483e-23	190592836	190678743	245	184	4	rs4308324;rs61634624;rs113591830;rs12488471	2	rs4308324;rs113591830	vit_crossattn_T1_and_vit_crossattn_T2
9	3:190640134:A:T	rs4308324	3	190640134	4.02188e-13	190592836	190678743	169	120	1	rs4308324	1	rs4308324	mocov2_T1_and_mocov2_T2
9	3:190641068:G:T	rs58531798	3	190641068	4.72269e-14	190592836	190678743	183	131	1	rs58531798	1	rs58531798	mocov2_T1_and_mocov2_T2
14	6:151857594:A:G	rs6931664	6	151857594	6.17876e-13	151847381	151912703	98	87	3	rs6931664;rs66775662;rs4870045	1	rs6931664	mocov2_T1_and_mocov2_T2	ESR1
15	6:151872448:G:T	rs9479068	6	151872448	6.3873e-12	151847381	151912703	98	87	3	rs9479068;rs66775662;rs4870045	1	rs9479068	mocov2_T1_and_mocov2_T2
16	6:151907748:C:T	rs4869742	6	151907748	1.4969e-15	151847381	151912703	92	82	3	rs4869742;rs6923538;rs1871859	1	rs4869742	vit_crossattn_T1_and_vit_crossattn_T2
14	6:151857594:A:G	rs6931664	6	151857594	1.69773e-14	151847381	151912703	58	50	2	rs6931664;rs4869744	1	rs6931664	vit_crossattn_T1_and_vit_crossattn_T2
23	9:113665419:A:G	rs1409682	9	113665419	7.15575e-13	113648136	113776692	101	84	3	rs1409682;rs10817124;rs10817103	1	rs1409682	mocov2_T1_and_mocov2_T2	ASTN2
22	9:113665419:A:G	rs1409682	9	113665419	1.06096e-11	113648136	113776692	105	88	3	rs1409682;rs10817124;rs10980625	1	rs1409682	mocov2_T1_and_mocov2_T2
19	9:113665419:A:G	rs1409682	9	113665419	4.65982e-18	113648136	113776692	101	84	3	rs1409682;rs10817124;rs10817103	1	rs1409682	vit_crossattn_T1_and_vit_crossattn_T2
23	9:113665419:A:G	rs1409682	9	113665419	7.58589e-18	113648136	113776692	105	88	3	rs1409682;rs10817124;rs10980625	1	rs1409682	vit_crossattn_T1_and_vit_crossattn_T2
27	11:110956784:A:T	rs321414	11	110956784	1.83141e-12	110945939	111068696	59	54	1	rs321414	1	rs321414	mocov2_T1_and_mocov2_T2	DRD2
25	11:110956784:A:T	rs321414	11	110956784	2.20877e-11	110945939	111068696	59	54	1	rs321414	1	rs321414	mocov2_T1_and_mocov2_T2
24	11:110950448:A:C	rs7941114	11	110950448	1.01428e-11	110945939	111068696	61	56	2	rs7941114;rs1607232	2	rs7941114;rs1607232	vit_crossattn_T1_and_vit_crossattn_T2
31	11:111068461:G:T	rs1607232	11	111068461	9.69298e-11	110945939	111068696	2	2	1	rs1607232	1	rs1607232	vit_crossattn_T1_and_vit_crossattn_T2
34	14:54425052:A:C	rs2761887	14	54425052	9.20568e-16	54419965	54435054	26	20	2	rs2761887;rs17563	1	rs2761887	vit_crossattn_T1_and_vit_crossattn_T2	DAAM1
28	14:54422399:C:G	rs2738265	14	54422399	8.63714e-13	54419965	54435054	26	20	2	rs2738265;rs17563	1	rs2738265	vit_crossattn_T1_and_vit_crossattn_T2
33	14:54422399:C:G	rs2738265	14	54422399	7.87559e-13	54419965	54435054	16	11	1	rs2738265	1	rs2738265	mocov2_T1_and_mocov2_T2
30	14:54425052:A:C	rs2761887	14	54425052	2.88544e-10	54419965	54435054	16	11	1	rs2761887	1	rs2761887	mocov2_T1_and_mocov2_T2
26	12:28238905:A:G	rs61920200	12	28238905	1.34584e-12	28220482	28667393	877	733	4	rs61920200;rs12229872;rs6898699;rs4930826	2	rs61920200;rs4930826	mocov2_T1_and_mocov2_T2	ATXN2
29	12:28238905:A:G	rs61920200	12	28238905	4.05618e-13	28220482	28667393	993	830	7	rs61920200;rs7305790;rs7961407;rs1511548;rs10843210;rs11049546;rs1002863	2	rs61920200;rs10843210	mocov2_T1_and_mocov2_T2
32	12:28239325:A:G	rs10843091	12	28239325	2.08925e-20	28220482	28667393	704	591	9	rs10843091;rs11834117;rs899505;rs4357727;rs11615869;rs7971970;rs10843084;rs722885;rs10843090	1	rs10843091	vit_crossattn_T1_and_vit_crossattn_T2
26	12:28238905:A:G	rs61920200	12	28238905	1.93938e-19	28220482	28667393	651	546	7	rs61920200;rs11834117;rs10843100;rs7972874;rs10492361;rs722885;rs11049329	1	rs61920200	vit_crossattn_T1_and_vit_crossattn_T2
35	16:87233185:A:C	rs4843553	16	87233185	6.95585e-23	87220694	87258088	117	101	7	rs4843553;rs55807115;rs35555768;rs28655023;rs9940975;rs62056167;rs9783786	1	rs4843553	vit_crossattn_T1_and_vit_crossattn_T2	CDH13
29	16:87233185:A:C	rs4843553	16	87233185	4.88564e-22	87220694	87258088	103	89	6	rs4843553;rs1108048;rs4843229;rs62056166;rs9940970;rs11860417	1	rs4843553	vit_crossattn_T1_and_vit_crossattn_T2
31	16:87225101:A:G	rs9937293	16	87225101	3.06658e-16	87220694	87258088	83	72	4	rs9937293;rs4240789;rs1108048;rs10863183	1	rs9937293	mocov2_T1_and_mocov2_T2
35	16:87225101:A:G	rs9937293	16	87225101	4.29416e-16	87220694	87258088	77	67	4	rs9937293;rs4240791;rs1108048;rs12919133	1	rs9937293	mocov2_T1_and_mocov2_T2
15	6:126819699:G:T	rs4418209	6	126819699	3.26024e-26	126659043	127080700	338	285	6	rs4418209;rs1337736;rs9398812;rs35848181;rs9401874;rs34539692	1	rs4418209	vit_crossattn_T1_and_vit_crossattn_T2	GRM1
13	6:126819699:G:T	rs4418209	6	126819699	1.00199e-25	126659043	127080700	321	269	5	rs4418209;rs1337736;rs35848181;rs9718171;rs34539692	1	rs4418209	vit_crossattn_T1_and_vit_crossattn_T2
13	6:126851160:C:T	rs1490384	6	126851160	5.03317e-14	126659043	127080700	255	208	2	rs1490384;rs58321169	1	rs1490384	mocov2_T1_and_mocov2_T2
12	6:126751921:C:T	rs9401881	6	126751921	5.05279e-11	126659043	127080700	252	205	1	rs9401881	1	rs9401881	mocov2_T1_and_mocov2_T2
16	7:2863574:A:G	rs2107964	7	2863574	3.53786e-21	2752152	2912928	230	186	5	rs2107964;rs1713913;rs1183079;rs798512;rs7790322	1	rs2107964	mocov2_T1_and_mocov2_T2	SDK1
15	7:2863574:A:G	rs2107964	7	2863574	3.0693e-18	2752152	2912928	222	180	3	rs2107964;rs1713913;rs798512	1	rs2107964	mocov2_T1_and_mocov2_T2
17	7:2883006:C:G	rs2533871	7	2883006	1.78037e-22	2752152	2912928	261	210	9	rs2533871;rs1182156;rs10257934;rs4719647;rs798561;rs798551;rs798531;rs7790322;rs1182197	1	rs2533871	vit_crossattn_T1_and_vit_crossattn_T2
15	7:2777825:A:G	rs798518	7	2777825	2.19143e-24	2752152	2912928	261	210	8	rs798518;rs7790322;rs1182156;rs1182151;rs10257934;rs4719647;rs798561;rs709282	1	rs798518	vit_crossattn_T1_and_vit_crossattn_T2
24	11:27301437:A:G	rs7115024	11	27301437	6.57185e-11	27265644	27629645	127	109	1	rs7115024	1	rs7115024	mocov2_T1_and_mocov2_T2	-
26	11:27301437:A:G	rs7115024	11	27301437	1.42081e-10	27265644	27629645	127	109	1	rs7115024	1	rs7115024	mocov2_T1_and_mocov2_T2
30	11:27502675:C:G	rs7938467	11	27502675	8.22636e-12	27265644	27629645	50	42	1	rs7938467	1	rs7938467	vit_crossattn_T1_and_vit_crossattn_T2
23	11:27502675:C:G	rs7938467	11	27502675	6.43274e-11	27265644	27629645	50	42	1	rs7938467	1	rs7938467	vit_crossattn_T1_and_vit_crossattn_T2
Supp Table 7- 14 loci that are consistently identified by two independent multimodal deep learning approaches (MoCo v2 and the ViT autoencoder with cross-attention), arising from 28 loci in the ViT cross-attention overlap set and 23 loci in the MoCo v2 overlap set.
